# Supplementary material for: Interpreting Metabolomic Profiles using Unbiased Pathway Models
Source: PLoS Comput Biol. 2010 Feb 26;6(2):e1000692. doi: 10.1371/journal.pcbi.1000692 (PMC2829050; doi:10.1371/journal.pcbi.1000692)
Supplement: Table S2 — Manually curated transport reactions used in addition to Recon 1 reactions to derive Metabolite Reaction networks. The first tab corresponds to 190 reactions already described in Recon 1 - a column was added that makes explicit the mapping to a single solute transporter. The second tab corresponds to 737 additional transport reactions identified by manual literature curation - these have also each been mapped to a single transporter. (0.22 MB XLS) [file pcbi.1000692.s002.xls]

## Sheet: Assigned transporter for Recon1
Reaction ID	Description	Equation	Pathway	Location	Reversibility	Enzyme/Transporter	Reference (PMID)
CHOLATEt3	ABC bile acid transporter	atp[c] + cholate[c] + h2o[c] --> adp[c] + cholate[e] + h[c] + pi[c]	Transport, Extracellular	Cytosol, Extra-organism	Irreversible	ABCB11	17404808
GCHOLAt3	ABC bile acid transporter	atp[c] + gchola[c] + h2o[c] --> adp[c] + gchola[e] + h[c] + pi[c]	Transport, Extracellular	Cytosol, Extra-organism	Irreversible	ABCB11	17404808
TCHOLAt3	ABC bile acid transporter	atp[c] + h2o[c] + tchola[c] --> adp[c] + h[c] + pi[c] + tchola[e]	Transport, Extracellular	Cytosol, Extra-organism	Irreversible	ABCB11	17404808
CHOLATEt2	cholate transport via sodium cotransport	cholate[e] + (2) na1[e] --> cholate[c] + (2) na1[c]	Transport, Extracellular	Cytosol, Extra-organism	Irreversible	SLC10A1	12851823
GCHOLAt2	glycocholate transport via sodium cotransport	gchola[e] + (2) na1[e] --> gchola[c] + (2) na1[c]	Transport, Extracellular	Cytosol, Extra-organism	Irreversible	SLC10A1	12851823
TCHOLAt2	taurocholate transport via sodium cotransport	(2) na1[e] + tchola[e] --> (2) na1[c] + tchola[c]	Transport, Extracellular	Cytosol, Extra-organism	Irreversible	SLC10A1	12851823
ESTRONESt2	estrone-3-sulfate transport via sodium cotransport	estrones[e] + (2) na1[e] --> estrones[c] + (2) na1[c]	Transport, Extracellular	Cytosol, Extra-organism	Irreversible	SLC10A6	16541252
SELt4_3	selenate transport via sodium symport	(3) na1[e] + sel[e] <==> (3) na1[c] + sel[c]	Transport, Extracellular	Cytosol, Extra-organism	Reversible	SLC13A1	12915942
SO4t4_3	sulfate transport via sodium symport	(3) na1[e] + so4[e] <==> (3) na1[c] + so4[c]	Transport, Extracellular	Cytosol, Extra-organism	Reversible	SLC13A1	12915942
TSULt4_3	thiosulfate transport via sodium symport	(3) na1[e] + tsul[e] <==> (3) na1[c] + tsul[c]	Transport, Extracellular	Cytosol, Extra-organism	Reversible	SLC13A1	12915942
CITt4_2	citrate transport via sodium symport	cit[e] + (2) na1[e] <==> cit[c] + (2) na1[c]	Transport, Extracellular	Cytosol, Extra-organism	Reversible	SLC13A2	12915942
SUCCt4_2	succinate transport via sodium symport	(2) na1[e] + succ[e] <==> (2) na1[c] + succ[c]	Transport, Extracellular	Cytosol, Extra-organism	Reversible	SLC13A2	12915942
AKGt4_3	AKG transport via sodium symport	akg[e] + (3) na1[e] <==> akg[c] + (3) na1[c]	Transport, Extracellular	Cytosol, Extra-organism	Reversible	SLC13A3	12915942
SUCCt4_3	succinate transport via sodium symport	(3) na1[e] + succ[e] <==> (3) na1[c] + succ[c]	Transport, Extracellular	Cytosol, Extra-organism	Reversible	SLC13A3	12915942
SO4t4_2	sulfate transport via sodium symport	(2) na1[e] + so4[e] <==> (2) na1[c] + so4[c]	Transport, Extracellular	Cytosol, Extra-organism	Reversible	SLC13A4	12915942
CITt4_4	citrate transport via sodium symport	cit[e] + (4) na1[e] <==> cit[c] + (4) na1[c]	Transport, Extracellular	Cytosol, Extra-organism	Reversible	SLC13A5	12915942
2HBt2	2-hydroxybutyrate cotransport with proton	2hb[e] + h[e] <==> 2hb[c] + h[c]	Transport, Extracellular	Cytosol, Extra-organism	Reversible	SLC16A1	12739169
ACACt2	acetoacetate transport via proton symport	acac[e] + h[e] <==> acac[c] + h[c]	Transport, Extracellular	Cytosol, Extra-organism	Reversible	SLC16A1	12739169
ACETONEt2	acetone transport via proton symport	acetone[e] + h[e] <==> acetone[c] + h[c]	Transport, Extracellular	Cytosol, Extra-organism	Reversible	SLC16A1	12739169
ACt2r	acetate reversible transport via proton symport	ac[e] + h[e] <==> ac[c] + h[c]	Transport, Extracellular	Cytosol, Extra-organism	Reversible	SLC16A1	12739169
BTNt2	Biotin reversible transport via proton symport	btn[e] + h[e] <==> btn[c] + h[c]	Transport, Extracellular	Cytosol, Extra-organism	Reversible	SLC16A1	12739169
BUTt2r	Butyrate transport via proton symport, reversible	but[e] + h[e] <==> but[c] + h[c]	Transport, Extracellular	Cytosol, Extra-organism	Reversible	SLC16A1	12739169
D-LACt2	D-lactate transport via proton symport	h[e] + lac-D[e] <==> h[c] + lac-D[c]	Transport, Extracellular	Cytosol, Extra-organism	Reversible	SLC16A1	12739169
L-LACt2r	L-lactate reversible transport via proton symport	h[e] + lac-L[e] <==> h[c] + lac-L[c]	Transport, Extracellular	Cytosol, Extra-organism	Reversible	SLC16A1	12739169
PYRt2r	pyruvate reversible transport via proton symport	h[e] + pyr[e] <==> h[c] + pyr[c]	Transport, Extracellular	Cytosol, Extra-organism	Reversible	SLC16A1	12739169
34DHPHEt	3,4-Dihydroxy-L-phenylalanine transport	34dhphe[e] <==> 34dhphe[c]	Transport, Extracellular	Cytosol, Extra-organism	Reversible	SLC16A10	12739169
TRPt	L-tryptophan transport	trp-L[e] <==> trp-L[c]	Transport, Extracellular	Cytosol, Extra-organism	Reversible	SLC16A10	12739169
TYRt	L-tyrosine transport	tyr-L[e] <==> tyr-L[c]	Transport, Extracellular	Cytosol, Extra-organism	Reversible	SLC16A10	12739169
FOLt2	folate transport via anion exchange	fol[e] + oh1[c] <==> fol[c] + oh1[e]	Transport, Extracellular	Cytosol, Extra-organism	Reversible	SLC19A1	14770311
THFt2	tetrahydrofolate transport via anion exchange	oh1[c] + thf[e] <==> oh1[e] + thf[c]	Transport, Extracellular	Cytosol, Extra-organism	Reversible	SLC19A1	14770311
THMt3	Thiamine transport in via proton antiport	h[c] + thm[e] <==> h[e] + thm[c]	Transport, Extracellular	Cytosol, Extra-organism	Reversible	SLC19A2	14770311
ASPDt6	D-aspartate transport via Na, H symport and K antiport	asp-D[e] + h[e] + k[c] + (3) na1[e] --> asp-D[c] + h[c] + k[e] + (3) na1[c]	Transport, Extracellular	Cytosol, Extra-organism	Irreversible	SLC1A1	14530974
ASPt6	L-aspartate transport via Na, H symport and K antiport	asp-L[e] + h[e] + k[c] + (3) na1[e] --> asp-L[c] + h[c] + k[e] + (3) na1[c]	Transport, Extracellular	Cytosol, Extra-organism	Irreversible	SLC1A1	14530974
GLUt6	Glutamate transport via Na, H symport and K antiport	glu-L[e] + h[e] + k[c] + (3) na1[e] --> glu-L[c] + h[c] + k[e] + (3) na1[c]	Transport, Extracellular	Cytosol, Extra-organism	Irreversible	SLC1A1	14530974
ALACYSNaEx	L-alanine/L-cysteine Na-dependent exchange (Ala-L in)	ala-L[e] + cys-L[c] + na1[e] --> ala-L[c] + cys-L[e] + na1[c]	Transport, Extracellular	Cytosol, Extra-organism	Irreversible	SLC1A4	14530974
ALASERNaEx	L-alanine/L-serine Na-dependent exchange (Ala-L in)	ala-L[e] + na1[e] + ser-L[c] --> ala-L[c] + na1[c] + ser-L[e]	Transport, Extracellular	Cytosol, Extra-organism	Irreversible	SLC1A4	14530974
ALAt4	Alanine-Sodium symporter	ala-L[e] + na1[e] --> ala-L[c] + na1[c]	Transport, Extracellular	Cytosol, Extra-organism	Irreversible	SLC1A4	14530974
ALATHRNaEx	L-alanine/L-threonine Na-dependent exchange (Ala-L in)	ala-L[e] + na1[e] + thr-L[c] --> ala-L[c] + na1[c] + thr-L[e]	Transport, Extracellular	Cytosol, Extra-organism	Irreversible	SLC1A4	14530974
CYSALANaEx	L-alanine/L-cysteine Na-dependent exchange (Cys-L in)	ala-L[c] + cys-L[e] + na1[e] --> ala-L[e] + cys-L[c] + na1[c]	Transport, Extracellular	Cytosol, Extra-organism	Irreversible	SLC1A4	14530974
CYSSERNaEx	L-serine/L-cysteine Na-dependent exchange (Cys-L in)	cys-L[e] + na1[e] + ser-L[c] --> cys-L[c] + na1[c] + ser-L[e]	Transport, Extracellular	Cytosol, Extra-organism	Irreversible	SLC1A4	14530974
CYSTHRNaEx	L-cysteine/L-threonine Na-dependent exchange (Cys-L in)	cys-L[e] + na1[e] + thr-L[c] --> cys-L[c] + na1[c] + thr-L[e]	Transport, Extracellular	Cytosol, Extra-organism	Irreversible	SLC1A4	14530974
SERALANaEx	L-alanine/L-serine Na-dependent exchange (Ser-L in)	ala-L[c] + na1[e] + ser-L[e] --> ala-L[e] + na1[c] + ser-L[c]	Transport, Extracellular	Cytosol, Extra-organism	Irreversible	SLC1A4	14530974
SERCYSNaEx	L-serine/L-cysteine Na-dependent exchange (Ser-L in)	cys-L[c] + na1[e] + ser-L[e] --> cys-L[e] + na1[c] + ser-L[c]	Transport, Extracellular	Cytosol, Extra-organism	Irreversible	SLC1A4	14530974
SERTHRNaEx	L-serine/L-threonine Na-dependent exchange (Ser-L in)	na1[e] + ser-L[e] + thr-L[c] --> na1[c] + ser-L[c] + thr-L[e]	Transport, Extracellular	Cytosol, Extra-organism	Irreversible	SLC1A4	14530974
THRALANaEx	L-alanine/L-threonine Na-dependent exchange (Thr-L in)	ala-L[c] + na1[e] + thr-L[e] --> ala-L[e] + na1[c] + thr-L[c]	Transport, Extracellular	Cytosol, Extra-organism	Irreversible	SLC1A4	14530974
THRCYSNaEx	L-cysteine/L-threonine Na-dependent exchange (Thr-L in)	cys-L[c] + na1[e] + thr-L[e] --> cys-L[e] + na1[c] + thr-L[c]	Transport, Extracellular	Cytosol, Extra-organism	Irreversible	SLC1A4	14530974
THRSERNaEx	L-serine/L-threonine Na-dependent exchange (Thr-L in)	na1[e] + ser-L[c] + thr-L[e] --> na1[c] + ser-L[e] + thr-L[c]	Transport, Extracellular	Cytosol, Extra-organism	Irreversible	SLC1A4	14530974
ALAASNNaEx	L-alanine/L-asparagine Na-dependent exchange (Ala-L in)	ala-L[e] + asn-L[c] + na1[e] --> ala-L[c] + asn-L[e] + na1[c]	Transport, Extracellular	Cytosol, Extra-organism	Irreversible	SLC1A5	14530974
ALAGLNNaEx	L-alanine/L-glutamine Na-dependent exchange (Ala-L in)	ala-L[e] + gln-L[c] + na1[e] --> ala-L[c] + gln-L[e] + na1[c]	Transport, Extracellular	Cytosol, Extra-organism	Irreversible	SLC1A5	14530974
ASNALANaEx	L-alanine/L-asparagine Na-dependent exchange (Asn-L in)	ala-L[c] + asn-L[e] + na1[e] --> ala-L[e] + asn-L[c] + na1[c]	Transport, Extracellular	Cytosol, Extra-organism	Irreversible	SLC1A5	14530974
ASNCYSNaEx	L-cysteine/L-asparagine Na-dependent exchange (Asn-L in)	asn-L[e] + cys-L[c] + na1[e] --> asn-L[c] + cys-L[e] + na1[c]	Transport, Extracellular	Cytosol, Extra-organism	Irreversible	SLC1A5	14530974
ASNGLNNaEx	L-glutamine/L-asparagine Na-dependent exchange (Asn-L in)	asn-L[e] + gln-L[c] + na1[e] --> asn-L[c] + gln-L[e] + na1[c]	Transport, Extracellular	Cytosol, Extra-organism	Irreversible	SLC1A5	14530974
ASNSERNaEx	L-serine/L-asparagine Na-dependent exchange (Asn-L in)	asn-L[e] + na1[e] + ser-L[c] --> asn-L[c] + na1[c] + ser-L[e]	Transport, Extracellular	Cytosol, Extra-organism	Irreversible	SLC1A5	14530974
ASNTHRNaEx	L-threonine/L-asparagine Na-dependent exchange (Asn-L in)	asn-L[e] + na1[e] + thr-L[c] --> asn-L[c] + na1[c] + thr-L[e]	Transport, Extracellular	Cytosol, Extra-organism	Irreversible	SLC1A5	14530974
CYSASNNaEx	L-cysteine/L-asparagine Na-dependent exchange (Cys-L in)	asn-L[c] + cys-L[e] + na1[e] --> asn-L[e] + cys-L[c] + na1[c]	Transport, Extracellular	Cytosol, Extra-organism	Irreversible	SLC1A5	14530974
CYSGLNNaEx	L-cysteine/L-glutamine Na-dependent exchange (Cys-L in)	cys-L[e] + gln-L[c] + na1[e] --> cys-L[c] + gln-L[e] + na1[c]	Transport, Extracellular	Cytosol, Extra-organism	Irreversible	SLC1A5	14530974
GLNALANaEx	L-alanine/L-glutamine Na-dependent exchange (Gln-L in)	ala-L[c] + gln-L[e] + na1[e] --> ala-L[e] + gln-L[c] + na1[c]	Transport, Extracellular	Cytosol, Extra-organism	Irreversible	SLC1A5	14530974
GLNASNNaEx	L-glutamine/L-asparagine Na-dependent exchange (Gln-L in)	asn-L[c] + gln-L[e] + na1[e] --> asn-L[e] + gln-L[c] + na1[c]	Transport, Extracellular	Cytosol, Extra-organism	Irreversible	SLC1A5	14530974
GLNCYSNaEx	L-cysteine/L-glutamine Na-dependent exchange (Gln-L in)	cys-L[c] + gln-L[e] + na1[e] --> cys-L[e] + gln-L[c] + na1[c]	Transport, Extracellular	Cytosol, Extra-organism	Irreversible	SLC1A5	14530974
GLNSERNaEx	L-serine/L-glutamine Na-dependent exchange (Gln-L in)	gln-L[e] + na1[e] + ser-L[c] --> gln-L[c] + na1[c] + ser-L[e]	Transport, Extracellular	Cytosol, Extra-organism	Irreversible	SLC1A5	14530974
GLNTHRNaEx	L-threonine/L-glutamine Na-dependent exchange (Gln-L in)	gln-L[e] + na1[e] + thr-L[c] --> gln-L[c] + na1[c] + thr-L[e]	Transport, Extracellular	Cytosol, Extra-organism	Irreversible	SLC1A5	14530974
SERASNNaEx	L-serine/L-asparagine Na-dependent exchange (Ser-L in)	asn-L[c] + na1[e] + ser-L[e] --> asn-L[e] + na1[c] + ser-L[c]	Transport, Extracellular	Cytosol, Extra-organism	Irreversible	SLC1A5	14530974
SERGLNNaEx	L-serine/L-glutamine Na-dependent exchange (Ser-L in)	gln-L[c] + na1[e] + ser-L[e] --> gln-L[e] + na1[c] + ser-L[c]	Transport, Extracellular	Cytosol, Extra-organism	Irreversible	SLC1A5	14530974
THRASNNaEx	L-threonine/L-asparagine Na-dependent exchange (Thr-L in)	asn-L[c] + na1[e] + thr-L[e] --> asn-L[e] + na1[c] + thr-L[c]	Transport, Extracellular	Cytosol, Extra-organism	Irreversible	SLC1A5	14530974
THRGLNNaEx	L-threonine/L-glutamine Na-dependent exchange (Thr-L in)	gln-L[c] + na1[e] + thr-L[e] --> gln-L[e] + na1[c] + thr-L[c]	Transport, Extracellular	Cytosol, Extra-organism	Irreversible	SLC1A5	14530974
CHOLtu	Choline uniport	chol[e] <==> chol[c]	Transport, Extracellular	Cytosol, Extra-organism	Reversible	SLC22A2	17473959
DOPAtu	Dopamine uniport	dopa[e] <==> dopa[c]	Transport, Extracellular	Cytosol, Extra-organism	Reversible	SLC22A2	17473959
HISTAtu	Histamine uniport	hista[e] <==> hista[c]	Transport, Extracellular	Cytosol, Extra-organism	Reversible	SLC22A2	17473959
NRPPHRtu	Norepinephrine uniport	nrpphr[e] <==> nrpphr[c]	Transport, Extracellular	Cytosol, Extra-organism	Reversible	SLC22A2	17473959
SRTNtu	Serotonin uniport	srtn[e] <==> srtn[c]	Transport, Extracellular	Cytosol, Extra-organism	Reversible	SLC22A2	17473959
CRNtHa	L-carnitine outward transport (H+ antiport)	crn[c] + h[e] --> crn[e] + h[c]	Transport, Extracellular	Cytosol, Extra-organism	Irreversible	SLC22A4	17473959
CRNtuIR	L-carnitine inward uniport	crn[e] --> crn[c]	Transport, Extracellular	Cytosol, Extra-organism	Irreversible	SLC22A4	17473959
CRNtuNa	L-carnitine inward transport by Na+ symport	crn[e] + na1[e] --> crn[c] + na1[c]	Transport, Extracellular	Cytosol, Extra-organism	Irreversible	SLC22A5	17473959
ASCBt4	L-ascorbate transport via sodium symport	ascb-L[e] + na1[e] <==> ascb-L[c] + na1[c]	Transport, Extracellular	Cytosol, Extra-organism	Reversible	SLC23A1	12845532
OXAHCOtex	oxalate transport via bicarbonate countertransport	(2) hco3[c] + oxa[e] --> (2) hco3[e] + oxa[c]	Transport, Extracellular	Cytosol, Extra-organism	Irreversible	SLC26A1	12759755
CYTDt4	cytidine transport in via sodium symport	cytd[e] + na1[e] --> cytd[c] + na1[c]	Transport, Extracellular	Cytosol, Extra-organism	Irreversible	SLC28A1	12856181
THMDt4	thymidine transport in via sodium symport	na1[e] + thymd[e] --> na1[c] + thymd[c]	Transport, Extracellular	Cytosol, Extra-organism	Irreversible	SLC28A1	12856181
URIt4	uridine transport in via sodium symport	na1[e] + uri[e] --> na1[c] + uri[c]	Transport, Extracellular	Cytosol, Extra-organism	Irreversible	SLC28A1	12856181
GSNt4	guanosine transport in via sodium symport	gsn[e] + na1[e] --> gsn[c] + na1[c]	Transport, Extracellular	Cytosol, Extra-organism	Irreversible	SLC28A2	12856181
INSt4	inosine transport in via sodium symport	ins[e] + na1[e] --> ins[c] + na1[c]	Transport, Extracellular	Cytosol, Extra-organism	Irreversible	SLC28A2	12856181
ADNt5	adenosine transport (1:2 Na/Adn cotransport)	adn[e] + (2) na1[e] --> adn[c] + (2) na1[c]	Transport, Extracellular	Cytosol, Extra-organism	Irreversible	SLC28A3	12856181
CYTDt5	cytidine transport (1:2 Na/cytd cotransport)	cytd[e] + (2) na1[e] --> cytd[c] + (2) na1[c]	Transport, Extracellular	Cytosol, Extra-organism	Irreversible	SLC28A3	12856181
GSNt5	guanosine transport in via sodium (1:2) symport	gsn[e] + (2) na1[e] --> gsn[c] + (2) na1[c]	Transport, Extracellular	Cytosol, Extra-organism	Irreversible	SLC28A3	12856181
INSt5	inosine transport in via sodium (1:2) symport	ins[e] + (2) na1[e] --> ins[c] + (2) na1[c]	Transport, Extracellular	Cytosol, Extra-organism	Irreversible	SLC28A3	12856181
THMDt5	thymidine transport (1:2 Na/Thymd cotransport)	(2) na1[e] + thymd[e] --> (2) na1[c] + thymd[c]	Transport, Extracellular	Cytosol, Extra-organism	Irreversible	SLC28A3	12856181
URIt5	uridine transport in via sodium symport (1:2)	(2) na1[e] + uri[e] --> (2) na1[c] + uri[c]	Transport, Extracellular	Cytosol, Extra-organism	Irreversible	SLC28A3	12856181
ADNt	adenosine facilated transport in cytosol	adn[e] <==> adn[c]	Transport, Extracellular	Cytosol, Extra-organism	Reversible	SLC29A1	12838422
CYTDt	cytidine facilated transport in cytosol	cytd[e] <==> cytd[c]	Transport, Extracellular	Cytosol, Extra-organism	Reversible	SLC29A1	12838422
GSNt	guanosine facilated transport in cytosol	gsn[e] <==> gsn[c]	Transport, Extracellular	Cytosol, Extra-organism	Reversible	SLC29A1	12838422
INSt	Inosine transport (diffusion)	ins[e] <==> ins[c]	Transport, Extracellular	Cytosol, Extra-organism	Reversible	SLC29A1	12838422
URIt	uridine facilated transport in cytosol	uri[e] <==> uri[c]	Transport, Extracellular	Cytosol, Extra-organism	Reversible	SLC29A1	12838422
ADEt	adenine reversible transport, cytosol	ade[e] <==> ade[c]	Transport, Extracellular	Cytosol, Extra-organism	Reversible	SLC29A2	12838422
CSNt	cytosine transport via facilated diffusion	csn[e] <==> csn[c]	Transport, Extracellular	Cytosol, Extra-organism	Reversible	SLC29A2	12838422
DCYTt	deoxycytidine transport via diffusion	dcyt[e] <==> dcyt[c]	Transport, Extracellular	Cytosol, Extra-organism	Reversible	SLC29A2	12838422
DGSNt	deoyguanosine transport via diffusion	dgsn[e] <==> dgsn[c]	Transport, Extracellular	Cytosol, Extra-organism	Reversible	SLC29A2	12838422
DINt	deoxyinosine transport via diffusion	din[e] <==> din[c]	Transport, Extracellular	Cytosol, Extra-organism	Reversible	SLC29A2	12838422
DURIt	deoxyuridine transport via diffusion	duri[e] <==> duri[c]	Transport, Extracellular	Cytosol, Extra-organism	Reversible	SLC29A2	12838422
GUAt	Guanine transport	gua[e] <==> gua[c]	Transport, Extracellular	Cytosol, Extra-organism	Reversible	SLC29A2	12838422
HYXNt	Hypoxanthine transport	hxan[e] <==> hxan[c]	Transport, Extracellular	Cytosol, Extra-organism	Reversible	SLC29A2	12838422
THYMt	thymine reversible transport via facilated diffusion	thym[e] <==> thym[c]	Transport, Extracellular	Cytosol, Extra-organism	Reversible	SLC29A2	12838422
URAt	uracil transport via facilated diffusion	ura[e] <==> ura[c]	Transport, Extracellular	Cytosol, Extra-organism	Reversible	SLC29A2	12838422
GALt1r	galactose transport (uniport)	gal[e] <==> gal[c]	Transport, Extracellular	Cytosol, Extra-organism	Reversible	SLC2A1	12750891
GAMt1r	glucosamine transport (uniport)	gam[e] <==> gam[c]	Transport, Extracellular	Cytosol, Extra-organism	Reversible	SLC2A1	12750891
MANt1r	mannose transport (uniport)	man[e] <==> man[c]	Transport, Extracellular	Cytosol, Extra-organism	Reversible	SLC2A1	12750891
INSTt2r	inositol transport in via proton symport	h[e] + inost[e] <==> h[c] + inost[c]	Transport, Extracellular	Cytosol, Extra-organism	Reversible	SLC2A13	12750891
FRUt1r	D-fructose transport in via uniport	fru[e] <==> fru[c]	Transport, Extracellular	Cytosol, Extra-organism	Reversible	SLC2A2	12750891
DHAAt1r	dehydroascorbate transport (uniport)	dhdascb[e] <==> dhdascb[c]	Transport, Extracellular	Cytosol, Extra-organism	Reversible	SLC2A3	12750891
MALTt1r	maltose transport (uniport)	malt[e] <==> malt[c]	Transport, Extracellular	Cytosol, Extra-organism	Reversible	SLC2A3	12750891
XYLt	D-xylose reversible transport	xyl-D[e] <==> xyl-D[c]	Transport, Extracellular	Cytosol, Extra-organism	Reversible	SLC2A3	12750891
3AIBt	3-amino-isobutyrate transport	3aib[c] --> 3aib[e]	Transport, Extracellular	Cytosol, Extra-organism	Irreversible	SLC38A2	8943955
HISt4	L-histidine transport in via sodium symport	his-L[e] + na1[e] --> his-L[c] + na1[c]	Transport, Extracellular	Cytosol, Extra-organism	Irreversible	SLC38A2	18195088
METt4	L-methionine transport in via sodium symport	met-L[e] + na1[e] --> met-L[c] + na1[c]	Transport, Extracellular	Cytosol, Extra-organism	Irreversible	SLC38A2	18195088
SERt4	L-serine via sodium symport	na1[e] + ser-L[e] --> na1[c] + ser-L[c]	Transport, Extracellular	Cytosol, Extra-organism	Irreversible	SLC38A2	18195088
THRt4	L-threonine via sodium symport	na1[e] + thr-L[e] --> na1[c] + thr-L[c]	Transport, Extracellular	Cytosol, Extra-organism	Irreversible	SLC38A2	18195088
ASNt4	L-asparagine transport in via sodium symport	asn-L[e] + na1[e] --> asn-L[c] + na1[c]	Transport, Extracellular	Cytosol, Extra-organism	Irreversible	SLC38A4	18195088
GLNt4	L-glutamine reversible transport via sodium symport	gln-L[e] + na1[e] --> gln-L[c] + na1[c]	Transport, Extracellular	Cytosol, Extra-organism	Irreversible	SLC38A4	18195088
GLYt4	glycine transport via sodium symport	gly[e] + na1[e] --> gly[c] + na1[c]	Transport, Extracellular	Cytosol, Extra-organism	Irreversible	SLC38A4	18195088
ILEtec	L-isoleucine transport via diffusion (extracellular to cytosol)	ile-L[e] <==> ile-L[c]	Transport, Extracellular	Cytosol, Extra-organism	Reversible	SLC43A1	18195088
LEUtec	L-leucine transport via diffusion (extracellular to cytosol)	leu-L[e] <==> leu-L[c]	Transport, Extracellular	Cytosol, Extra-organism	Reversible	SLC43A1	18195088
METtec	L-methionine transport via diffusion (extracellular to cytosol)	met-L[e] <==> met-L[c]	Transport, Extracellular	Cytosol, Extra-organism	Reversible	SLC43A1	18195088
PHEtec	L-phenylalanine transport via diffusion (extracellular to cytosol)	phe-L[e] <==> phe-L[c]	Transport, Extracellular	Cytosol, Extra-organism	Reversible	SLC43A1	18195088
VALtec	L-valine transport via diffusion (extracellular to cytosol)	val-L[e] <==> val-L[c]	Transport, Extracellular	Cytosol, Extra-organism	Reversible	SLC43A1	18195088
GALt2_2	D-galactose transport via proton symport	gal[e] + (2) h[e] <==> gal[c] + (2) h[c]	Transport, Extracellular	Cytosol, Extra-organism	Reversible	SLC5A1	12748858
GALt4_2	galactose transport via sodium symport	gal[e] + (2) na1[e] <==> gal[c] + (2) na1[c]	Transport, Extracellular	Cytosol, Extra-organism	Reversible	SLC5A1	12748858
GLCt2_2	D-glucose transport in via proton symport	glc-D[e] + (2) h[e] <==> glc-D[c] + (2) h[c]	Transport, Extracellular	Cytosol, Extra-organism	Reversible	SLC5A1	12748858
GLCt4_2	glucose transport via sodium symport	glc-D[e] + (2) na1[e] <==> glc-D[c] + (2) na1[c]	Transport, Extracellular	Cytosol, Extra-organism	Reversible	SLC5A1	12748858
H2Ot	H2O transport via diffusion	h2o[e] <==> h2o[c]	Transport, Extracellular	Cytosol, Extra-organism	Reversible	SLC5A1	12748858
NAt	sodium transport (uniport)	na1[e] <==> na1[c]	Transport, Extracellular	Cytosol, Extra-organism	Reversible	SLC5A1	12748858
UREAt	Urea transport via facilitate diffusion	urea[e] <==> urea[c]	Transport, Extracellular	Cytosol, Extra-organism	Reversible	SLC5A1	12748858
UREAt5	urea, water cotransport	h2o[e] + urea[e] <==> h2o[c] + urea[c]	Transport, Extracellular	Cytosol, Extra-organism	Reversible	SLC5A1	12748858
INSTt4_2	inositol transport via sodium symport	inost[e] + (2) na1[e] <==> inost[c] + (2) na1[c]	Transport, Extracellular	Cytosol, Extra-organism	Reversible	SLC5A11	12748858
GLCt4	glucose transport via sodium symport	glc-D[e] + na1[e] <==> glc-D[c] + na1[c]	Transport, Extracellular	Cytosol, Extra-organism	Reversible	SLC5A2	12748858
INSTt4	inositol transport via sodium symport	inost[e] + na1[e] <==> inost[c] + na1[c]	Transport, Extracellular	Cytosol, Extra-organism	Reversible	SLC5A3	12748858
NAIt	Na+ / iodide cotransport	i[e] + (2) na1[e] <==> i[c] + (2) na1[c]	Transport, Extracellular	Cytosol, Extra-organism	Reversible	SLC5A5	12748858
BTNt3i	Biotin transport via sodium symport	atp[c] + btn[e] + h2o[c] + (2) na1[e] --> adp[c] + btn[c] + h[c] + (2) na1[c] + pi[c]	Transport, Extracellular	Cytosol, Extra-organism	Irreversible	SLC5A6	12748858
LIPOti	Lipoate transport via sodium symport	atp[c] + h2o[c] + lipoate[e] + (2) na1[e] --> adp[c] + h[c] + lipoate[c] + (2) na1[c] + pi[c]	Transport, Extracellular	Cytosol, Extra-organism	Irreversible	SLC5A6	12748858
PNTOt5	Pantothenate sodium symporter II	atp[c] + h2o[c] + (2) na1[e] + pnto-R[e] --> adp[c] + h[c] + (2) na1[c] + pi[c] + pnto-R[c]	Transport, Extracellular	Cytosol, Extra-organism	Irreversible	SLC5A6	12748858
CHOLt4	choline, sodium cotransport	chol[e] + na1[e] <==> chol[c] + na1[c]	Transport, Extracellular	Cytosol, Extra-organism	Reversible	SLC5A7	12748858
FRUt4	D-fructose transport via sodium cotransport	fru[e] + na1[e] <==> fru[c] + na1[c]	Transport, Extracellular	Cytosol, Extra-organism	Reversible	SLC5A9	15607332
GALt4	galactose transport via sodium symport	gal[e] + na1[e] <==> gal[c] + na1[c]	Transport, Extracellular	Cytosol, Extra-organism	Reversible	SLC5A9	15607332
MANt4	D-mannose transport via sodium cotransport	man[e] + na1[e] <==> man[c] + na1[c]	Transport, Extracellular	Cytosol, Extra-organism	Reversible	SLC5A9	15607332
ABUTt4(2)r	4-aminobutyrate reversible transport in via sodium symport (1:2)	4abut[e] + (2) na1[e] <==> 4abut[c] + (2) na1[c]	Transport, Extracellular	Cytosol, Extra-organism	Reversible	SLC6A1	12719981
GLYBt4(2)r	Betaine transport (sodium symport) (2:1)	glyb[e] + (2) na1[e] <==> glyb[c] + (2) na1[c]	Transport, Extracellular	Cytosol, Extra-organism	Reversible	SLC6A12	12719981
CYSt4	L-cysteine reversible transport via sodium symport	cys-L[e] + na1[e] --> cys-L[c] + na1[c]	Transport, Extracellular	Cytosol, Extra-organism	Irreversible	SLC6A14	18599538
ILEt4	L-isoleucine transport in via sodium symport	ile-L[e] + na1[e] --> ile-L[c] + na1[c]	Transport, Extracellular	Cytosol, Extra-organism	Irreversible	SLC6A14	18599538
LYSt4	L-lysine transport in via sodium symport	lys-L[e] + na1[e] --> lys-L[c] + na1[c]	Transport, Extracellular	Cytosol, Extra-organism	Irreversible	SLC6A14	18599538
TRPt4	L-tryptophan transport in via sodium symport	na1[e] + trp-L[e] --> na1[c] + trp-L[c]	Transport, Extracellular	Cytosol, Extra-organism	Irreversible	SLC6A14	18599538
TYRt4	L-tyrosine transport in via sodium symport	na1[e] + tyr-L[e] --> na1[c] + tyr-L[c]	Transport, Extracellular	Cytosol, Extra-organism	Irreversible	SLC6A14	18599538
VALt4	L-valine transport in via sodium symport	na1[e] + val-L[e] --> na1[c] + val-L[c]	Transport, Extracellular	Cytosol, Extra-organism	Irreversible	SLC6A14	18599538
NRPPHRt4(2)r	Norepinephrine reversible transport in via sodium symport (1:2)	(2) na1[e] + nrpphr[e] <==> (2) na1[c] + nrpphr[c]	Transport, Extracellular	Cytosol, Extra-organism	Reversible	SLC6A2	12719981
DOPAt4(2)r	Dopamine reversible transport in via sodium symport (1:2)	dopa[e] + (2) na1[e] <==> dopa[c] + (2) na1[c]	Transport, Extracellular	Cytosol, Extra-organism	Reversible	SLC6A3	12719981
SRTNt6(2)r	Seratonin reversible transport in via sodium symport/potassium antiport (1:2)	(2) k[c] + (2) na1[e] + srtn[e] <==> (2) k[e] + (2) na1[c] + srtn[c]	Transport, Extracellular	Cytosol, Extra-organism	Reversible	SLC6A4	12719981
ala-Bt7(211)r	glycine reversible transport via sodium and chloride symport (2:1:1)	cl[e] + gly[e] + (2) na1[e] <==> cl[c] + gly[c] + (2) na1[c]	Transport, Extracellular	Cytosol, Extra-organism	Reversible	SLC6A5	12719981
TAURt4(2)r	taurine transport (sodium symport) (2:1)	(2) na1[e] + taur[e] <==> (2) na1[c] + taur[c]	Transport, Extracellular	Cytosol, Extra-organism	Reversible	SLC6A6	12719981
PROt4(2)r	Proline transport (sodium symport) (2:1)	(2) na1[e] + pro-L[e] <==> (2) na1[c] + pro-L[c]	Transport, Extracellular	Cytosol, Extra-organism	Reversible	SLC6A7	12719981
CREATt4(2)r	Creatine transport (sodium symport) (2:1)	creat[e] + (2) na1[e] <==> creat[c] + (2) na1[c]	Transport, Extracellular	Cytosol, Extra-organism	Reversible	SLC6A8	12719981
GLYt7(311)r	glycine reversible transport via sodium and chloride symport (3:1:1)	cl[e] + gly[e] + (3) na1[e] <==> cl[c] + gly[c] + (3) na1[c]	Transport, Extracellular	Cytosol, Extra-organism	Reversible	SLC6A9	12719981
ARGtiDF	L-arginine transport via diffusion (extracellular to cytosol)	arg-L[e] --> arg-L[c]	Transport, Extracellular	Cytosol, Extra-organism	Irreversible	SLC7A1	18195088
HIStiDF	L-histidine transport via diffusion (extracellular to cytosol)	his-L[e] --> his-L[c]	Transport, Extracellular	Cytosol, Extra-organism	Irreversible	SLC7A1	18195088
LYStiDF	L-lysine transport via diffusion (extracellular to cytosol)	lys-L[e] --> lys-L[c]	Transport, Extracellular	Cytosol, Extra-organism	Irreversible	SLC7A1	18195088
ORNtiDF	ornithine transport via diffusion (extracellular to cytosol)	orn[e] --> orn[c]	Transport, Extracellular	Cytosol, Extra-organism	Irreversible	SLC7A1	18195088
ALADGLNexR	L-alanine/glutamine reversible exchange	ala-D[e] + gln-L[c] <==> ala-D[c] + gln-L[e]	Transport, Extracellular	Cytosol, Extra-organism	Reversible	SLC7A10	18195088
ALADGLYexR	D-alanine/glycine reversible exchange	ala-D[e] + gly[c] <==> ala-D[c] + gly[e]	Transport, Extracellular	Cytosol, Extra-organism	Reversible	SLC7A10	18195088
ALAGLNexR	L-alanine/glutamine reversible exchange	ala-L[e] + gln-L[c] <==> ala-L[c] + gln-L[e]	Transport, Extracellular	Cytosol, Extra-organism	Reversible	SLC7A10	18195088
ALAGLYexR	L-alanine/glycine reversible exchange	ala-L[e] + gly[c] <==> ala-L[c] + gly[e]	Transport, Extracellular	Cytosol, Extra-organism	Reversible	SLC7A10	18195088
CYSGLUexR	L-cysteine/L-glutamine reversible exchanger	cys-L[e] + gln-L[c] <==> cys-L[c] + gln-L[e]	Transport, Extracellular	Cytosol, Extra-organism	Reversible	SLC7A10	18195088
CYSGLYexR	L-cysteine/glycine reversible exchanger	cys-L[c] + gly[e] <==> cys-L[e] + gly[c]	Transport, Extracellular	Cytosol, Extra-organism	Reversible	SLC7A10	18195088
SERDGLNexR	D-Serine/Glutamine reversible exchange	gln-L[c] + ser-D[e] <==> gln-L[e] + ser-D[c]	Transport, Extracellular	Cytosol, Extra-organism	Reversible	SLC7A10	18195088
SERDGLYexR	D-Serine/Glycine reversible exchange	gly[c] + ser-D[e] <==> gly[e] + ser-D[c]	Transport, Extracellular	Cytosol, Extra-organism	Reversible	SLC7A10	18195088
SERGLNexR	L-Serine/Glutamine reversible exchange	gln-L[c] + ser-L[e] <==> gln-L[e] + ser-L[c]	Transport, Extracellular	Cytosol, Extra-organism	Reversible	SLC7A10	18195088
SERGLYexR	L-Serine/Glycine reversible exchange	gly[c] + ser-L[e] <==> gly[e] + ser-L[c]	Transport, Extracellular	Cytosol, Extra-organism	Reversible	SLC7A10	18195088
THRGLNexR	L-threonine/glycine reversible exchange	gln-L[c] + thr-L[e] <==> gln-L[e] + thr-L[c]	Transport, Extracellular	Cytosol, Extra-organism	Reversible	SLC7A10	18195088
THRGLYexR	L-threonine/glycine reversible exchange	gly[c] + thr-L[e] <==> gly[e] + thr-L[c]	Transport, Extracellular	Cytosol, Extra-organism	Reversible	SLC7A10	18195088
CYSTGLUex	L-cystine/L-glutamate exchanger	Lcystin[e] + glu-L[c] --> Lcystin[c] + glu-L[e]	Transport, Extracellular	Cytosol, Extra-organism	Irreversible	SLC7A11	18195088
NAt3_1	sodium proton antiporter (H:NA is 1:1)	h[e] + na1[c] <==> h[c] + na1[e]	Transport, Extracellular	Cytosol, Extra-organism	Reversible	SLC9A1	12845533
NAt5	sodium/ammonium proton antiporter	na1[c] + nh4[e] <==> na1[e] + nh4[c]	Transport, Extracellular	Cytosol, Extra-organism	Reversible	SLC9A1	12845533
GCHOLAt	glycocholate transport via bicarbonate countertransport	gchola[e] + hco3[c] <==> gchola[c] + hco3[e]	Transport, Extracellular	Cytosol, Extra-organism	Reversible	SLCO1A2	14579113
PROSTGE2t	prostaglandin transport via bicarbonate countertransport	hco3[c] + prostge2[e] <==> hco3[e] + prostge2[c]	Transport, Extracellular	Cytosol, Extra-organism	Reversible	SLCO1A2	14579113
TCHOLAt	taurocholate transport via bicarbonate countertransport	hco3[c] + tchola[e] <==> hco3[e] + tchola[c]	Transport, Extracellular	Cytosol, Extra-organism	Reversible	SLCO1A2	14579113
THYOXt	T4 transport via bicarbonate countertransport	hco3[c] + thyox-L[e] <==> hco3[e] + thyox-L[c]	Transport, Extracellular	Cytosol, Extra-organism	Reversible	SLCO1A2	14579113
TRIODTHYt	T3 transport via bicarbonate countertransport	hco3[c] + triodthy[e] <==> hco3[e] + triodthy[c]	Transport, Extracellular	Cytosol, Extra-organism	Reversible	SLCO1A2	14579113
BILDGLCURt	bilirubin beta-diglucuronide transport via bicarbonate countertransport	bildglcur[e] + hco3[c] <==> bildglcur[c] + hco3[e]	Transport, Extracellular	Cytosol, Extra-organism	Reversible	SLCO1B1	14579113
BILGLCURt	bilirubin monoglucuronide transport via bicarbonate countertransport	bilglcur[e] + hco3[c] <==> bilglcur[c] + hco3[e]	Transport, Extracellular	Cytosol, Extra-organism	Reversible	SLCO1B1	14579113
BILIRUBt2	bilirubin transport via bicarbonate countertransport	bilirub[e] + hco3[c] <==> bilirub[c] + hco3[e]	Transport, Extracellular	Cytosol, Extra-organism	Reversible	SLCO1B1	14579113
LEUKTRC4t	leukotriene C4 transport via bicarbonate countertransport	hco3[c] + leuktrC4[e] <==> hco3[e] + leuktrC4[c]	Transport, Extracellular	Cytosol, Extra-organism	Reversible	SLCO1B3	14579113
ESTRADIOLGLCt	estradiol glucuronide transport via bicarbonate countertransport	estradiolglc[e] + hco3[c] <==> estradiolglc[c] + hco3[e]	Transport, Extracellular	Cytosol, Extra-organism	Reversible	SLCO1C1	14579113
ESTRONESt	estrone-3-sulfate transport via bicarbonate countertransport	estrones[e] + hco3[c] <==> estrones[c] + hco3[e]	Transport, Extracellular	Cytosol, Extra-organism	Reversible	SLCO1C1	14579113
PROSTGD2t	prostaglandin transport via bicarbonate countertransport	hco3[c] + prostgd2[e] <==> hco3[e] + prostgd2[c]	Transport, Extracellular	Cytosol, Extra-organism	Reversible	SLCO2A1	14579113
PROSTGE1t	prostaglandin transport via bicarbonate countertransport	hco3[c] + prostge1[e] <==> hco3[e] + prostge1[c]	Transport, Extracellular	Cytosol, Extra-organism	Reversible	SLCO2A1	14579113
DHEASt	dehydroepiandrosterone sulfate transport via bicarbonate countertransport	dheas[e] + hco3[c] <==> dheas[c] + hco3[e]	Transport, Extracellular	Cytosol, Extra-organism	Reversible	SLCO2B1	14579113

## Sheet: Additional Curated Reactions
Reaction ID	Description	Equation	Pathway	Location	Reversibility	Enzyme/Transporter	Reference (PMID)
1	3,4-Dihydroxy-L-phenylalanine/L-citrulline exchange (34dhphe in)	34dhphe[e] + citr-L[c] --> citr-L[e] + 34dhphe[c]	Transport, Extracellular	Cytosol, Extra-organism	Irreversible	SLC7A5	14770310
2	3,4-Dihydroxy-L-phenylalanine/L-histidine exchange (34dhphe in)	34dhphe[e] + his-L[c] --> his-L[e] + 34dhphe[c]	Transport, Extracellular	Cytosol, Extra-organism	Irreversible	SLC7A5	14770310
3	3,4-Dihydroxy-L-phenylalanine/L-isoleucine exchange (34dhphe in)	34dhphe[e] + ile-L[c] --> ile-L[e] + 34dhphe[c]	Transport, Extracellular	Cytosol, Extra-organism	Irreversible	SLC7A5	14770310
4	3,4-Dihydroxy-L-phenylalanine/L-leucine exchange (34dhphe in)	34dhphe[e] + leu-L[c] --> leu-L[e] + 34dhphe[c]	Transport, Extracellular	Cytosol, Extra-organism	Irreversible	SLC7A5	14770310
5	3,4-Dihydroxy-L-phenylalanine/L-methionine exchange (34dhphe in)	34dhphe[e] + met-L[c] --> met-L[e] + 34dhphe[c]	Transport, Extracellular	Cytosol, Extra-organism	Irreversible	SLC7A5	14770310
6	3,4-Dihydroxy-L-phenylalanine/L-phenylalanine exchange (34dhphe in)	34dhphe[e] + phe-L[c] --> phe-L[e] + 34dhphe[c]	Transport, Extracellular	Cytosol, Extra-organism	Irreversible	SLC7A5	14770310
7	3,4-Dihydroxy-L-phenylalanine/T4 exchange (34dhphe in)	34dhphe[e] + thyox-L[c] --> thyox-L[e] + 34dhphe[c]	Transport, Extracellular	Cytosol, Extra-organism	Irreversible	SLC7A5	14770310
8	3,4-Dihydroxy-L-phenylalanine/T3 exchange (34dhphe in)	34dhphe[e] + triodthy[c] --> triodthy[e] + 34dhphe[c]	Transport, Extracellular	Cytosol, Extra-organism	Irreversible	SLC7A5	14770310
9	3,4-Dihydroxy-L-phenylalanine/L-tryptophan exchange (34dhphe in)	34dhphe[e] + trp-L[c] --> trp-L[e] + 34dhphe[c]	Transport, Extracellular	Cytosol, Extra-organism	Irreversible	SLC7A5	14770310
10	3,4-Dihydroxy-L-phenylalanine/L-tyrosine exchange (34dhphe in)	34dhphe[e] + tyr-L[c] --> tyr-L[e] + 34dhphe[c]	Transport, Extracellular	Cytosol, Extra-organism	Irreversible	SLC7A5	14770310
11	3,4-Dihydroxy-L-phenylalanine/L-valine exchange (34dhphe in)	34dhphe[e] + val-L[c] --> val-L[e] + 34dhphe[c]	Transport, Extracellular	Cytosol, Extra-organism	Irreversible	SLC7A5	14770310
12	4-aminobutyrat transport in via proton symport	4abut[e] + h[e] --> 4abut[c] + h[c]	Transport, Extracellular	Cytosol, Extra-organism	Irreversible	SLC36A2	18195088
13	L-alanine/L-arginine exchange (ala-L in)	ala-L[e] + arg-L[c] + na1[e] --> arg-L[e] + ala-L[c] + na1[c]	Transport, Extracellular	Cytosol, Extra-organism	Irreversible	SLC7A6	18195088
14	L-alanine/L-asparagine exchange (ala-L in)	ala-L[e] + asn-L[c] --> asn-L[e] + ala-L[c]	Transport, Extracellular	Cytosol, Extra-organism	Irreversible	SLC7A8	18195088
15	L-alanine/L-citrulline exchange (ala-L in)	ala-L[e] + citr-L[c] --> citr-L[e] + ala-L[c]	Transport, Extracellular	Cytosol, Extra-organism	Irreversible	SLC7A8	18195088
16	L-alanine/L-cysteine exchange (ala-L in)	ala-L[e] + cys-L[c] --> cys-L[e] + ala-L[c]	Transport, Extracellular	Cytosol, Extra-organism	Irreversible	SLC7A8	18195088
17	L-alanine/L-cysteine Na-dependent exchange (Ala-L in)	ala-L[e] + cys-L[c] + na1[e] --> ala-L[c] + cys-L[e] + na1[c]	Transport, Extracellular	Cytosol, Extra-organism	Irreversible	SLC1A5	14530974
18	L-alanine/L-glutamine exchange (ala-L in)	ala-L[e] + gln-L[c] --> gln-L[e] + ala-L[c]	Transport, Extracellular	Cytosol, Extra-organism	Irreversible	SLC7A8	18195088
19	L-alanine/glycine exchange (ala-L in)	ala-L[e] + gly[c] --> gly[e] + ala-L[c]	Transport, Extracellular	Cytosol, Extra-organism	Irreversible	SLC7A8	18195088
20	L-alanine/L-histidine exchange (ala-L in)	ala-L[e] + his-L[c] + na1[e] --> his-L[e] + ala-L[c] + na1[c]	Transport, Extracellular	Cytosol, Extra-organism	Irreversible	SLC7A6	18195088
21	L-alanine/L-homoserine NA-dependent exchange (ala-L in)	ala-L[e] + hom-L[c] + na1[e] --> hom-L[e] + ala-L[c] + na1[c]	Transport, Extracellular	Cytosol, Extra-organism	Irreversible	SLC1A4	8419338
22	L-alanine/L-homoserine NA-dependent exchange (ala-L in)	ala-L[e] + hom-L[c] + na1[e] --> hom-L[e] + ala-L[c] + na1[c]	Transport, Extracellular	Cytosol, Extra-organism	Irreversible	SLC1A5	8419338
23	L-alanine/L-homoserine reversible exchange	ala-L[e] + hom-L[c] <==> hom-L[e] + ala-L[c]	Transport, Extracellular	Cytosol, Extra-organism	Reversible	SLC7A10	18195088
24	L-alanine/L-homoserine exchange (ala-L in)	ala-L[e] + hom-L[c] --> hom-L[e] + ala-L[c]	Transport, Extracellular	Cytosol, Extra-organism	Irreversible	SLC7A8	18195088
25	L-alanine/L-isoleucine exchange (ala-L in)	ala-L[e] + ile-L[c] --> ile-L[e] + ala-L[c]	Transport, Extracellular	Cytosol, Extra-organism	Irreversible	SLC7A8	18195088
26	L-alanine/L-leucine exchange (ala-L in)	ala-L[e] + leu-L[c] --> leu-L[e] + ala-L[c]	Transport, Extracellular	Cytosol, Extra-organism	Irreversible	SLC7A8	18195088
27	L-alanine/L-lysine exchange (ala-L in)	ala-L[e] + lys-L[c] + na1[e] --> lys-L[e] + ala-L[c] + na1[c]	Transport, Extracellular	Cytosol, Extra-organism	Irreversible	SLC7A6	18195088
28	L-alanine/L-methionine exchange (ala-L in)	ala-L[e] + met-L[c] --> met-L[e] + ala-L[c]	Transport, Extracellular	Cytosol, Extra-organism	Irreversible	SLC7A8	18195088
29	L-alanine/ornithine exchange (ala-L in)	ala-L[e] + orn[c] + na1[e] --> orn[e] + ala-L[c] + na1[c]	Transport, Extracellular	Cytosol, Extra-organism	Irreversible	SLC7A6	18195088
30	L-alanine/L-phenylalanine exchange (ala-L in)	ala-L[e] + phe-L[c] --> phe-L[e] + ala-L[c]	Transport, Extracellular	Cytosol, Extra-organism	Irreversible	SLC7A8	18195088
31	L-alanine/L-serine exchange (ala-L in)	ala-L[e] + ser-L[c] --> ser-L[e] + ala-L[c]	Transport, Extracellular	Cytosol, Extra-organism	Irreversible	SLC7A8	18195088
32	L-alanine/L-serine Na-dependent exchange (Ala-L in)	ala-L[e] + na1[e] + ser-L[c] --> ala-L[c] + na1[c] + ser-L[e]	Transport, Extracellular	Cytosol, Extra-organism	Irreversible	SLC1A5	14530974
33	L-alanine transport in via proton symport	ala-L[e] + h[e] --> ala-L[c] + h[c]	Transport, Extracellular	Cytosol, Extra-organism	Irreversible	SLC36A1	18195088
34	L-alanine transport in via proton symport	ala-L[e] + h[e] --> ala-L[c] + h[c]	Transport, Extracellular	Cytosol, Extra-organism	Irreversible	SLC36A2	18195088
35	L-alanine transport in via sodium symport	ala-L[e] + na1[e] --> ala-L[c] + na1[c]	Transport, Extracellular	Cytosol, Extra-organism	Irreversible	SLC38A2	14530974
36	L-alanine transport in via sodium symport	ala-L[e] + na1[e] --> ala-L[c] + na1[c]	Transport, Extracellular	Cytosol, Extra-organism	Irreversible	SLC38A4	14530974
37	L-alanine transport in via sodium symport	ala-L[e] + na1[e] --> ala-L[c] + na1[c]	Transport, Extracellular	Cytosol, Extra-organism	Irreversible	SLC38A4	14530974
38	L-alanine transport in via sodium symport	ala-L[e] + na1[e] --> ala-L[c] + na1[c]	Transport, Extracellular	Cytosol, Extra-organism	Irreversible	SLC6A14	14530974
39	L-alanine transport in via sodium symport	ala-L[e] + na1[e] --> ala-L[c] + na1[c]	Transport, Extracellular	Cytosol, Extra-organism	Irreversible	SLC6A19	14530974
40	L-alanine/L-threonine exchange (ala-L in)	ala-L[e] + thr-L[c] --> thr-L[e] + ala-L[c]	Transport, Extracellular	Cytosol, Extra-organism	Irreversible	SLC7A8	18195088
41	L-alanine/L-threonine Na-dependent exchange (Ala-L in)	ala-L[e] + na1[e] + thr-L[c] --> ala-L[c] + na1[c] + thr-L[e]	Transport, Extracellular	Cytosol, Extra-organism	Irreversible	SLC1A5	14530974
42	L-alanine/L-tryptophan exchange (ala-L in)	ala-L[e] + trp-L[c] --> trp-L[e] + ala-L[c]	Transport, Extracellular	Cytosol, Extra-organism	Irreversible	SLC7A8	18195088
43	L-alanine/L-tyrosine exchange (ala-L in)	ala-L[e] + tyr-L[c] --> tyr-L[e] + ala-L[c]	Transport, Extracellular	Cytosol, Extra-organism	Irreversible	SLC7A8	18195088
44	L-alanine/L-valine exchange (ala-L in)	ala-L[e] + val-L[c] --> val-L[e] + ala-L[c]	Transport, Extracellular	Cytosol, Extra-organism	Irreversible	SLC7A8	18195088
45	L-arginine/L-citrulline exchange (arg-L in)	arg-L[e] + citr-L[c] + na1[e] --> citr-L[e] + arg-L[c] + na1[c]	Transport, Extracellular	Cytosol, Extra-organism	Irreversible	SLC7A9	18195088
46	L-arginine/L-isoleucine exchange (arg-L in)	arg-L[e] + ile-L[c] + na1[e] --> ile-L[e] + arg-L[c] + na1[c]	Transport, Extracellular	Cytosol, Extra-organism	Irreversible	SLC7A9	18195088
47	L-arginine/L-leucine exchange (arg-L in)	arg-L[e] + leu-L[c] + na1[e] --> leu-L[e] + arg-L[c] + na1[c]	Transport, Extracellular	Cytosol, Extra-organism	Irreversible	SLC7A9	18195088
48	L-arginine/L-methionine exchange (arg-L in)	arg-L[e] + met-L[c] + na1[e] --> met-L[e] + arg-L[c] + na1[c]	Transport, Extracellular	Cytosol, Extra-organism	Irreversible	SLC7A9	18195088
49	L-arginine/L-phenylalanine exchange (arg-L in)	arg-L[e] + phe-L[c] + na1[e] --> phe-L[e] + arg-L[c] + na1[c]	Transport, Extracellular	Cytosol, Extra-organism	Irreversible	SLC7A9	18195088
50	L-arginine transport in	arg-L[e] + na1[e] --> arg-L[c] + na1[c]	Transport, Extracellular	Cytosol, Extra-organism	Irreversible	SLC38A4	18195088
51	L-arginine transport in via sodium symport	arg-L[e] + na1[e] --> arg-L[c] + na1[c]	Transport, Extracellular	Cytosol, Extra-organism	Reversible	SLC6A14	18195088
52	L-lysine transport via diffusion (extracellular to cytosol)	lys-L[e] --> lys-L[c]	Transport, Extracellular	Cytosol, Extra-organism	Irreversible	SLC7A2	18195088
53	L-lysine transport via diffusion (extracellular to cytosol)	lys-L[e] --> lys-L[c]	Transport, Extracellular	Cytosol, Extra-organism	Irreversible	SLC7A3	18195088
54	L-arginine/L-tryptophan exchange (arg-L in)	arg-L[e] + trp-L[c] + na1[e] --> trp-L[e] + arg-L[c] + na1[c]	Transport, Extracellular	Cytosol, Extra-organism	Irreversible	SLC7A9	18195088
55	L-arginine/L-tyrosine exchange (arg-L in)	arg-L[e] + tyr-L[c] + na1[e] --> tyr-L[e] + arg-L[c] + na1[c]	Transport, Extracellular	Cytosol, Extra-organism	Irreversible	SLC7A9	18195088
56	L-arginine/L-valine exchange (arg-L in)	arg-L[e] + val-L[c] + na1[e] --> val-L[e] + arg-L[c] + na1[c]	Transport, Extracellular	Cytosol, Extra-organism	Irreversible	SLC7A9	18195088
57	ascorbic acid in	ascb-L[e] --> ascb-L[c]	Transport, Extracellular	Cytosol, Extra-organism	Irreversible	SLC22A7	17245646
58	L-asparagine/L-alanine exchange (asn-L in)	asn-L[e] + ala-L[c] --> ala-L[e] + asn-L[c]	Transport, Extracellular	Cytosol, Extra-organism	Irreversible	SLC7A8	18195088
59	L-asparagine/L-citrulline exchange (asn-L in)	asn-L[e] + citr-L[c] --> citr-L[e] + asn-L[c]	Transport, Extracellular	Cytosol, Extra-organism	Irreversible	SLC7A8	18195088
60	L-asparagine/L-cysteine exchange (asn-L in)	asn-L[e] + cys-L[c] --> cys-L[e] + asn-L[c]	Transport, Extracellular	Cytosol, Extra-organism	Irreversible	SLC7A8	18195088
61	L-asparagine/L-glutamine exchange (asn-L in)	asn-L[e] + gln-L[c] --> gln-L[e] + asn-L[c]	Transport, Extracellular	Cytosol, Extra-organism	Irreversible	SLC7A8	18195088
62	L-asparagine/glycine exchange (asn-L in)	asn-L[e] + gly[c] --> gly[e] + asn-L[c]	Transport, Extracellular	Cytosol, Extra-organism	Irreversible	SLC7A8	18195088
63	L-asparagine/L-homoserine NA-dependent exchange (asn-L in)	asn-L[e] + hom-L[c] + na1[e] --> hom-L[e] + asn-L[c] + na1[c]	Transport, Extracellular	Cytosol, Extra-organism	Irreversible	SLC1A5	8419338
64	L-asparagine/L-homoserine exchange (asn-L in)	asn-L[e] + hom-L[c] --> hom-L[e] + asn-L[c]	Transport, Extracellular	Cytosol, Extra-organism	Irreversible	SLC7A8	18195088
65	L-asparagine/L-isoleucine exchange (asn-L in)	asn-L[e] + ile-L[c] --> ile-L[e] + asn-L[c]	Transport, Extracellular	Cytosol, Extra-organism	Irreversible	SLC7A8	18195088
66	L-asparagine/L-leucine exchange (asn-L in)	asn-L[e] + leu-L[c] --> leu-L[e] + asn-L[c]	Transport, Extracellular	Cytosol, Extra-organism	Irreversible	SLC7A8	18195088
67	L-asparagine/L-methionine exchange (asn-L in)	asn-L[e] + met-L[c] --> met-L[e] + asn-L[c]	Transport, Extracellular	Cytosol, Extra-organism	Irreversible	SLC7A8	18195088
68	L-asparagine/L-phenylalanine exchange (asn-L in)	asn-L[e] + phe-L[c] --> phe-L[e] + asn-L[c]	Transport, Extracellular	Cytosol, Extra-organism	Irreversible	SLC7A8	18195088
69	L-asparagine/L-serine exchange (asn-L in)	asn-L[e] + ser-L[c] --> ser-L[e] + asn-L[c]	Transport, Extracellular	Cytosol, Extra-organism	Irreversible	SLC7A8	18195088
70	L-asparagine transport in via sodium symport	asn-L[e] + na1[e] --> asn-L[c] + na1[c]	Transport, Extracellular	Cytosol, Extra-organism	Irreversible	SLC38A1	18195088
71	L-asparagine transport in via sodium symport	asn-L[e] + na1[e] --> asn-L[c] + na1[c]	Transport, Extracellular	Cytosol, Extra-organism	Irreversible	SLC38A2	18195088
72	L-asparagine transport in via sodium symport and proton antiport	asn-L[e] + na1[e] + h[c] <==> asn-L[c] + na1[c] + h[e]	Transport, Extracellular	Cytosol, Extra-organism	Reversible	SLC38A5	18195088
73	L-asparagine transport in via sodium symport	asn-L[e] + na1[e] --> asn-L[c] + na1[c]	Transport, Extracellular	Cytosol, Extra-organism	Reversible	SLC6A14	18195088
74	L-asparagine transport in via sodium symport	asn-L[e] + na1[e] --> asn-L[c] + na1[c]	Transport, Extracellular	Cytosol, Extra-organism	Irreversible	SLC6A19	18195088
75	L-asparagine/L-threonine exchange (asn-L in)	asn-L[e] + thr-L[c] --> thr-L[e] + asn-L[c]	Transport, Extracellular	Cytosol, Extra-organism	Irreversible	SLC7A8	18195088
76	L-asparagine/L-tryptophan exchange (asn-L in)	asn-L[e] + trp-L[c] --> trp-L[e] + asn-L[c]	Transport, Extracellular	Cytosol, Extra-organism	Irreversible	SLC7A8	18195088
77	L-asparagine/L-tyrosine exchange (asn-L in)	asn-L[e] + tyr-L[c] --> tyr-L[e] + asn-L[c]	Transport, Extracellular	Cytosol, Extra-organism	Irreversible	SLC7A8	18195088
78	L-asparagine/L-valine exchange (asn-L in)	asn-L[e] + val-L[c] --> val-L[e] + asn-L[c]	Transport, Extracellular	Cytosol, Extra-organism	Irreversible	SLC7A8	18195088
79	L-aspartate transport via Na, H symport and K antiport	asp-L[e] + h[e] + k[c] + (3) na1[e] --> asp-L[c] + h[c] + k[e] + (3) na1[c]	Transport, Extracellular	Cytosol, Extra-organism	Irreversible	SLC1A2	14530974
80	L-aspartate transport via Na, H symport and K antiport	asp-L[e] + h[e] + k[c] + (3) na1[e] --> asp-L[c] + h[c] + k[e] + (3) na1[c]	Transport, Extracellular	Cytosol, Extra-organism	Irreversible	SLC1A3	14530974
81	L-aspartate transport via Na, H symport and K antiport	asp-L[e] + h[e] + k[c] + (3) na1[e] --> asp-L[c] + h[c] + k[e] + (3) na1[c]	Transport, Extracellular	Cytosol, Extra-organism	Irreversible	SLC1A6	14530974
82	L-aspartate transport via Na, H symport and K antiport	asp-L[e] + h[e] + k[c] + (3) na1[e] --> asp-L[c] + h[c] + k[e] + (3) na1[c]	Transport, Extracellular	Cytosol, Extra-organism	Irreversible	SLC1A7	14530974
83	B-alanine/L-alanine reversible exchange	ala-B[e] + ala-L[c] <==> ala-L[e] + ala-B[c]	Transport, Extracellular	Cytosol, Extra-organism	Reversible	SLC7A10	18195088
84	B-alanine/L-homoserine reversible exchange	ala-B[e] + hom-L[c] <==> hom-L[e] + ala-B[c]	Transport, Extracellular	Cytosol, Extra-organism	Reversible	SLC7A10	18195088
85	B-alanine transport in via sodium symport	ala-B[e] + na1[e] --> ala-B[c] + na1[c]	Transport, Extracellular	Cytosol, Extra-organism	Reversible	SLC6A14	18599538
86	cyclic AMP/alpha-ketoglutarate exchange (camp in)	camp[e] + akg[c] --> akg[e] + camp[c]	Transport, Extracellular	Cytosol, Extra-organism	Irreversible	SLC22A6	17245646
87	L-citrulline/3,4-Dihydroxy-L-phenylalanine exchange (citr-L in)	citr-L[e] + 34dhphe[c] --> 34dhphe[e] + citr-L[c]	Transport, Extracellular	Cytosol, Extra-organism	Irreversible	SLC7A5	18195088
88	L-citrulline/L-alanine exchange (citr-L in)	citr-L[e] + ala-L[c] --> ala-L[e] + citr-L[c]	Transport, Extracellular	Cytosol, Extra-organism	Irreversible	SLC7A8	18195088
89	L-citrulline/L-asparagine exchange (citr-L in)	citr-L[e] + asn-L[c] --> asn-L[e] + citr-L[c]	Transport, Extracellular	Cytosol, Extra-organism	Irreversible	SLC7A8	18195088
90	L-citrulline/L-cysteine exchange (citr-L in)	citr-L[e] + cys-L[c] --> cys-L[e] + citr-L[c]	Transport, Extracellular	Cytosol, Extra-organism	Irreversible	SLC7A8	18195088
91	L-citrulline/L-glutamine exchange (citr-L in)	citr-L[e] + gln-L[c] --> gln-L[e] + citr-L[c]	Transport, Extracellular	Cytosol, Extra-organism	Irreversible	SLC7A8	18195088
92	L-citrulline/glycine exchange (citr-L in)	citr-L[e] + gly[c] --> gly[e] + citr-L[c]	Transport, Extracellular	Cytosol, Extra-organism	Irreversible	SLC7A8	18195088
93	L-citrulline/L-histidine exchange (citr-L in)	citr-L[e] + his-L[c] --> his-L[e] + citr-L[c]	Transport, Extracellular	Cytosol, Extra-organism	Irreversible	SLC7A5	18195088
94	L-citrulline/L-homoserine exchange (citr-L in)	citr-L[e] + hom-L[c] --> hom-L[e] + citr-L[c]	Transport, Extracellular	Cytosol, Extra-organism	Irreversible	SLC7A8	18195088
95	L-citrulline/L-isoleucine exchange (citr-L in)	citr-L[e] + ile-L[c] --> ile-L[e] + citr-L[c]	Transport, Extracellular	Cytosol, Extra-organism	Irreversible	SLC7A5	18195088
96	L-citrulline/L-isoleucine exchange (citr-L in)	citr-L[e] + ile-L[c] --> ile-L[e] + citr-L[c]	Transport, Extracellular	Cytosol, Extra-organism	Irreversible	SLC7A8	18195088
97	L-citrulline/L-isoleucine exchange (citr-L in)	citr-L[e] + ile-L[c] + na1[e] --> ile-L[e] + citr-L[c] + na1[c]	Transport, Extracellular	Cytosol, Extra-organism	Irreversible	SLC7A9	18195088
98	L-citrulline/L-leucine exchange (citr-L in)	citr-L[e] + leu-L[c] --> leu-L[e] + citr-L[c]	Transport, Extracellular	Cytosol, Extra-organism	Irreversible	SLC7A5	18195088
99	L-citrulline/L-leucine exchange (citr-L in)	citr-L[e] + leu-L[c] --> leu-L[e] + citr-L[c]	Transport, Extracellular	Cytosol, Extra-organism	Irreversible	SLC7A8	18195088
100	L-citrulline/L-leucine exchange (citr-L in)	citr-L[e] + leu-L[c] + na1[e] --> leu-L[e] + citr-L[c] + na1[c]	Transport, Extracellular	Cytosol, Extra-organism	Irreversible	SLC7A9	18195088
101	L-citrulline/L-methionine exchange (citr-L in)	citr-L[e] + met-L[c] --> met-L[e] + citr-L[c]	Transport, Extracellular	Cytosol, Extra-organism	Irreversible	SLC7A5	18195088
102	L-citrulline/L-methionine exchange (citr-L in)	citr-L[e] + met-L[c] --> met-L[e] + citr-L[c]	Transport, Extracellular	Cytosol, Extra-organism	Irreversible	SLC7A8	18195088
103	L-citrulline/L-methionine exchange (citr-L in)	citr-L[e] + met-L[c] + na1[e] --> met-L[e] + citr-L[c] + na1[c]	Transport, Extracellular	Cytosol, Extra-organism	Irreversible	SLC7A9	18195088
104	L-citrulline/L-phenylalanine exchange (citr-L in)	citr-L[e] + phe-L[c] --> phe-L[e] + citr-L[c]	Transport, Extracellular	Cytosol, Extra-organism	Irreversible	SLC7A5	18195088
105	L-citrulline/L-phenylalanine exchange (citr-L in)	citr-L[e] + phe-L[c] --> phe-L[e] + citr-L[c]	Transport, Extracellular	Cytosol, Extra-organism	Irreversible	SLC7A8	18195088
106	L-citrulline/L-phenylalanine exchange (citr-L in)	citr-L[e] + phe-L[c] + na1[e] --> phe-L[e] + citr-L[c] + na1[c]	Transport, Extracellular	Cytosol, Extra-organism	Irreversible	SLC7A9	18195088
107	L-citrulline/L-serine exchange (citr-L in)	citr-L[e] + ser-L[c] --> ser-L[e] + citr-L[c]	Transport, Extracellular	Cytosol, Extra-organism	Irreversible	SLC7A8	18195088
108	L-citrulline transport in via sodium symport	citr-L[e] + na1[e] --> citr-L[c] + na1[c]	Transport, Extracellular	Cytosol, Extra-organism	Reversible	SLC6A14	12719981
109	L-citrulline transport in via sodium symport	citr-L[e] + na1[e] --> citr-L[c] + na1[c]	Transport, Extracellular	Cytosol, Extra-organism	Irreversible	SLC6A19	12719981
110	L-citrulline/L-threonine exchange (citr-L in)	citr-L[e] + thr-L[c] --> thr-L[e] + citr-L[c]	Transport, Extracellular	Cytosol, Extra-organism	Irreversible	SLC7A8	18195088
111	L-citrulline/T4 exchange (citr-L in)	citr-L[e] + thyox-L[c] --> thyox-L[e] + citr-L[c]	Transport, Extracellular	Cytosol, Extra-organism	Irreversible	SLC7A5	18195088
112	L-citrulline/T3 exchange (citr-L in)	citr-L[e] + triodthy[c] --> triodthy[e] + citr-L[c]	Transport, Extracellular	Cytosol, Extra-organism	Irreversible	SLC7A5	18195088
113	L-citrulline/L-tryptophan exchange (citr-L in)	citr-L[e] + trp-L[c] --> trp-L[e] + citr-L[c]	Transport, Extracellular	Cytosol, Extra-organism	Irreversible	SLC7A5	18195088
114	L-citrulline/L-tryptophan exchange (citr-L in)	citr-L[e] + trp-L[c] --> trp-L[e] + citr-L[c]	Transport, Extracellular	Cytosol, Extra-organism	Irreversible	SLC7A8	18195088
115	L-citrulline/L-tryptophan exchange (citr-L in)	citr-L[e] + trp-L[c] + na1[e] --> trp-L[e] + citr-L[c] + na1[c]	Transport, Extracellular	Cytosol, Extra-organism	Irreversible	SLC7A9	18195088
116	L-citrulline/L-tyrosine exchange (citr-L in)	citr-L[e] + tyr-L[c] --> tyr-L[e] + citr-L[c]	Transport, Extracellular	Cytosol, Extra-organism	Irreversible	SLC7A5	18195088
117	L-citrulline/L-tyrosine exchange (citr-L in)	citr-L[e] + tyr-L[c] --> tyr-L[e] + citr-L[c]	Transport, Extracellular	Cytosol, Extra-organism	Irreversible	SLC7A8	18195088
118	L-citrulline/L-tyrosine exchange (citr-L in)	citr-L[e] + tyr-L[c] + na1[e] --> tyr-L[e] + citr-L[c] + na1[c]	Transport, Extracellular	Cytosol, Extra-organism	Irreversible	SLC7A9	18195088
119	L-citrulline/L-valine exchange (citr-L in)	citr-L[e] + val-L[c] --> val-L[e] + citr-L[c]	Transport, Extracellular	Cytosol, Extra-organism	Irreversible	SLC7A5	18195088
120	L-citrulline/L-valine exchange (citr-L in)	citr-L[e] + val-L[c] --> val-L[e] + citr-L[c]	Transport, Extracellular	Cytosol, Extra-organism	Irreversible	SLC7A8	18195088
121	L-citrulline/L-valine exchange (citr-L in)	citr-L[e] + val-L[c] + na1[e] --> val-L[e] + citr-L[c] + na1[c]	Transport, Extracellular	Cytosol, Extra-organism	Irreversible	SLC7A9	18195088
122	L-carnitine transport in via sodium symport	crn[e] + na1[e] --> crn[c] + na1[c]	Transport, Extracellular	Cytosol, Extra-organism	Reversible	SLC6A14	17473959
123	cortisol/alpha-ketoglutarate exchange (crtsl in)	crtsl[e] + akg[c] --> akg[e] + crtsl[c]	Transport, Extracellular	Cytosol, Extra-organism	Irreversible	SLC22A8	17245646
124	L-cysteine/L-alanine reversible exchange	cys-L[e] + ala-L[c] <==> ala-L[e] + cys-L[c]	Transport, Extracellular	Cytosol, Extra-organism	Reversible	SLC7A10	18195088
125	L-cysteine/L-alanine exchange (cys-L in)	cys-L[e] + ala-L[c] --> ala-L[e] + cys-L[c]	Transport, Extracellular	Cytosol, Extra-organism	Irreversible	SLC7A8	18195088
126	L-alanine/L-cysteine Na-dependent exchange (Cys-L in)	ala-L[c] + cys-L[e] + na1[e] --> ala-L[e] + cys-L[c] + na1[c]	Transport, Extracellular	Cytosol, Extra-organism	Irreversible	SLC1A5	14530974
127	L-cysteine/L-arginine exchange (cys-L in)	cys-L[e] + arg-L[c] + na1[e] --> arg-L[e] + cys-L[c] + na1[c]	Transport, Extracellular	Cytosol, Extra-organism	Irreversible	SLC7A6	18195088
128	L-cysteine/L-asparagine exchange (cys-L in)	cys-L[e] + asn-L[c] --> asn-L[e] + cys-L[c]	Transport, Extracellular	Cytosol, Extra-organism	Irreversible	SLC7A8	18195088
129	L-cysteine/B-alanine reversible exchange	cys-L[e] + ala-B[c] <==> ala-B[e] + cys-L[c]	Transport, Extracellular	Cytosol, Extra-organism	Reversible	SLC7A10	18195088
130	L-cysteine/L-citrulline exchange (cys-L in)	cys-L[e] + citr-L[c] --> citr-L[e] + cys-L[c]	Transport, Extracellular	Cytosol, Extra-organism	Irreversible	SLC7A8	18195088
131	L-cysteine/L-glutamine exchange (cys-L in)	cys-L[e] + gln-L[c] --> gln-L[e] + cys-L[c]	Transport, Extracellular	Cytosol, Extra-organism	Irreversible	SLC7A8	18195088
132	L-cysteine/glycine exchange (cys-L in)	cys-L[e] + gly[c] --> gly[e] + cys-L[c]	Transport, Extracellular	Cytosol, Extra-organism	Irreversible	SLC7A8	18195088
133	L-cysteine/L-histidine exchange (cys-L in)	cys-L[e] + his-L[c] + na1[e] --> his-L[e] + cys-L[c] + na1[c]	Transport, Extracellular	Cytosol, Extra-organism	Irreversible	SLC7A6	18195088
134	L-cysteine/L-homoserine NA-dependent exchange (cys-L in)	cys-L[e] + hom-L[c] + na1[e] --> hom-L[e] + cys-L[c] + na1[c]	Transport, Extracellular	Cytosol, Extra-organism	Irreversible	SLC1A4	8419338
135	L-cysteine/L-homoserine NA-dependent exchange (cys-L in)	cys-L[e] + hom-L[c] + na1[e] --> hom-L[e] + cys-L[c] + na1[c]	Transport, Extracellular	Cytosol, Extra-organism	Irreversible	SLC1A5	8419338
136	L-cysteine/L-homoserine reversible exchange	cys-L[e] + hom-L[c] <==> hom-L[e] + cys-L[c]	Transport, Extracellular	Cytosol, Extra-organism	Reversible	SLC7A10	18195088
137	L-cysteine/L-homoserine exchange (cys-L in)	cys-L[e] + hom-L[c] --> hom-L[e] + cys-L[c]	Transport, Extracellular	Cytosol, Extra-organism	Irreversible	SLC7A8	18195088
138	L-cysteine/L-isoleucine exchange (cys-L in)	cys-L[e] + ile-L[c] --> ile-L[e] + cys-L[c]	Transport, Extracellular	Cytosol, Extra-organism	Irreversible	SLC7A8	18195088
139	L-cysteine/L-leucine exchange (cys-L in)	cys-L[e] + leu-L[c] --> leu-L[e] + cys-L[c]	Transport, Extracellular	Cytosol, Extra-organism	Irreversible	SLC7A8	18195088
140	L-cysteine/L-lysine exchange (cys-L in)	cys-L[e] + lys-L[c] + na1[e] --> lys-L[e] + cys-L[c] + na1[c]	Transport, Extracellular	Cytosol, Extra-organism	Irreversible	SLC7A6	18195088
141	L-cysteine/L-methionine exchange (cys-L in)	cys-L[e] + met-L[c] --> met-L[e] + cys-L[c]	Transport, Extracellular	Cytosol, Extra-organism	Irreversible	SLC7A8	18195088
142	L-cysteine/ornithine exchange (cys-L in)	cys-L[e] + orn[c] + na1[e] --> orn[e] + cys-L[c] + na1[c]	Transport, Extracellular	Cytosol, Extra-organism	Irreversible	SLC7A6	18195088
143	L-cysteine/L-phenylalanine exchange (cys-L in)	cys-L[e] + phe-L[c] --> phe-L[e] + cys-L[c]	Transport, Extracellular	Cytosol, Extra-organism	Irreversible	SLC7A8	18195088
144	L-cysteine/L-serine reversible exchange	cys-L[e] + ser-L[c] <==> ser-L[e] + cys-L[c]	Transport, Extracellular	Cytosol, Extra-organism	Reversible	SLC7A10	18195088
145	L-cysteine/L-serine exchange (cys-L in)	cys-L[e] + ser-L[c] --> ser-L[e] + cys-L[c]	Transport, Extracellular	Cytosol, Extra-organism	Irreversible	SLC7A8	18195088
146	L-serine/L-cysteine Na-dependent exchange (Cys-L in)	cys-L[e] + na1[e] + ser-L[c] --> cys-L[c] + na1[c] + ser-L[e]	Transport, Extracellular	Cytosol, Extra-organism	Irreversible	SLC1A5	14530974
147	L-cysteine transport in via sodium symport	cys-L[e] + na1[e] --> cys-L[c] + na1[c]	Transport, Extracellular	Cytosol, Extra-organism	Irreversible	SLC38A1	18599538
148	L-cysteine transport in via sodium symport	cys-L[e] + na1[e] --> cys-L[c] + na1[c]	Transport, Extracellular	Cytosol, Extra-organism	Irreversible	SLC38A2	18599538
149	L-cysteine transport in via sodium symport	cys-L[e] + na1[e] --> cys-L[c] + na1[c]	Transport, Extracellular	Cytosol, Extra-organism	Irreversible	SLC38A4	18599538
150	L-cysteine transport in via sodium symport	cys-L[e] + na1[e] --> cys-L[c] + na1[c]	Transport, Extracellular	Cytosol, Extra-organism	Irreversible	SLC6A19	18599538
151	L-cystine/L-citrulline exchange (Lcystin in)	Lcystin[e] + citr-L[c] + na1[e] --> citr-L[e] + Lcystin[c] + na1[c]	Transport, Extracellular	Cytosol, Extra-organism	Irreversible	SLC7A9	18195088
152	L-cysteine/L-threonine reversible exchange	cys-L[e] + thr-L[c] <==> thr-L[e] + cys-L[c]	Transport, Extracellular	Cytosol, Extra-organism	Reversible	SLC7A10	18195088
153	L-cysteine/L-threonine exchange (cys-L in)	cys-L[e] + thr-L[c] --> thr-L[e] + cys-L[c]	Transport, Extracellular	Cytosol, Extra-organism	Irreversible	SLC7A8	18195088
154	L-cysteine/L-threonine Na-dependent exchange (Cys-L in)	cys-L[e] + na1[e] + thr-L[c] --> cys-L[c] + na1[c] + thr-L[e]	Transport, Extracellular	Cytosol, Extra-organism	Irreversible	SLC1A5	14530974
155	L-cystine/L-isoleucine exchange (Lcystin in)	Lcystin[e] + ile-L[c] + na1[e] --> ile-L[e] + Lcystin[c] + na1[c]	Transport, Extracellular	Cytosol, Extra-organism	Irreversible	SLC7A9	18195088
156	L-cystine/L-leucine exchange (Lcystin in)	Lcystin[e] + leu-L[c] + na1[e] --> leu-L[e] + Lcystin[c] + na1[c]	Transport, Extracellular	Cytosol, Extra-organism	Irreversible	SLC7A9	18195088
157	L-cystine/L-methionine exchange (Lcystin in)	Lcystin[e] + met-L[c] + na1[e] --> met-L[e] + Lcystin[c] + na1[c]	Transport, Extracellular	Cytosol, Extra-organism	Irreversible	SLC7A9	18195088
158	L-cystine/L-phenylalanine exchange (Lcystin in)	Lcystin[e] + phe-L[c] + na1[e] --> phe-L[e] + Lcystin[c] + na1[c]	Transport, Extracellular	Cytosol, Extra-organism	Irreversible	SLC7A9	18195088
159	L-cysteine/L-tryptophan exchange (cys-L in)	cys-L[e] + trp-L[c] --> trp-L[e] + cys-L[c]	Transport, Extracellular	Cytosol, Extra-organism	Irreversible	SLC7A8	18195088
160	L-cystine/L-tryptophan exchange (Lcystin in)	Lcystin[e] + trp-L[c] + na1[e] --> trp-L[e] + Lcystin[c] + na1[c]	Transport, Extracellular	Cytosol, Extra-organism	Irreversible	SLC7A9	18195088
161	L-cystine/L-tyrosine exchange (Lcystin in)	Lcystin[e] + tyr-L[c] + na1[e] --> tyr-L[e] + Lcystin[c] + na1[c]	Transport, Extracellular	Cytosol, Extra-organism	Irreversible	SLC7A9	18195088
162	L-cystine/L-valine exchange (Lcystin in)	Lcystin[e] + val-L[c] + na1[e] --> val-L[e] + Lcystin[c] + na1[c]	Transport, Extracellular	Cytosol, Extra-organism	Irreversible	SLC7A9	18195088
163	L-cysteine/L-tyrosine exchange (cys-L in)	cys-L[e] + tyr-L[c] --> tyr-L[e] + cys-L[c]	Transport, Extracellular	Cytosol, Extra-organism	Irreversible	SLC7A8	18195088
164	L-cysteine/L-valine exchange (cys-L in)	cys-L[e] + val-L[c] --> val-L[e] + cys-L[c]	Transport, Extracellular	Cytosol, Extra-organism	Irreversible	SLC7A8	18195088
165	dehydroepiandrosterone sulfate/alpha-ketoglutarate exchange (dheas in)	dheas[e] + akg[c] --> akg[e] + dheas[c]	Transport, Extracellular	Cytosol, Extra-organism	Irreversible	SLC22A8	17245646
166	estradiol glucuronide/alpha-ketoglutarate exchange (estradiolglc in)	estradiolglc[e] + akg[c] --> akg[e] + estradiolglc[c]	Transport, Extracellular	Cytosol, Extra-organism	Irreversible	SLC22A8	17245646
167	estrone-3-sulfate/alpha-ketoglutarate exchange (estrones in)	estrones[e] + akg[c] --> akg[e] + estrones[c]	Transport, Extracellular	Cytosol, Extra-organism	Irreversible	SLC22A8	17245646
168	folate/alpha-ketoglutarate exchange (fol in)	fol[e] + akg[c] --> akg[e] + fol[c]	Transport, Extracellular	Cytosol, Extra-organism	Irreversible	SLC22A6	17245646
169	L-glutamine/L-alanine exchange (gln-L in)	gln-L[e] + ala-L[c] --> ala-L[e] + gln-L[c]	Transport, Extracellular	Cytosol, Extra-organism	Irreversible	SLC7A8	18195088
170	L-glutamine/L-arginine exchange (gln-L in)	gln-L[e] + arg-L[c] + na1[e] --> arg-L[e] + gln-L[c] + na1[c]	Transport, Extracellular	Cytosol, Extra-organism	Irreversible	SLC7A6	18195088
171	L-glutamine/L-arginine exchange (gln-L in)	gln-L[e] + arg-L[c] + na1[e] --> arg-L[e] + gln-L[c] + na1[c]	Transport, Extracellular	Cytosol, Extra-organism	Irreversible	SLC7A7	18195088
172	L-glutamine/L-asparagine exchange (gln-L in)	gln-L[e] + asn-L[c] --> asn-L[e] + gln-L[c]	Transport, Extracellular	Cytosol, Extra-organism	Irreversible	SLC7A8	18195088
173	L-glutamine/L-citrulline exchange (gln-L in)	gln-L[e] + citr-L[c] --> citr-L[e] + gln-L[c]	Transport, Extracellular	Cytosol, Extra-organism	Irreversible	SLC7A8	18195088
174	L-glutamine/L-cysteine exchange (gln-L in)	gln-L[e] + cys-L[c] --> cys-L[e] + gln-L[c]	Transport, Extracellular	Cytosol, Extra-organism	Irreversible	SLC7A8	18195088
175	L-glutamine/glycine exchange (gln-L in)	gln-L[e] + gly[c] --> gly[e] + gln-L[c]	Transport, Extracellular	Cytosol, Extra-organism	Irreversible	SLC7A8	18195088
176	L-glutamine/L-histidine exchange (gln-L in)	gln-L[e] + his-L[c] + na1[e] --> his-L[e] + gln-L[c] + na1[c]	Transport, Extracellular	Cytosol, Extra-organism	Irreversible	SLC7A6	18195088
177	L-glutamine/L-histidine exchange (gln-L in)	gln-L[e] + his-L[c] + na1[e] --> his-L[e] + gln-L[c] + na1[c]	Transport, Extracellular	Cytosol, Extra-organism	Irreversible	SLC7A7	18195088
178	L-glutamine/L-homoserine NA-dependent exchange (gln-L in)	gln-L[e] + hom-L[c] + na1[e] --> hom-L[e] + gln-L[c] + na1[c]	Transport, Extracellular	Cytosol, Extra-organism	Irreversible	SLC1A5	8419338
179	L-glutamine/L-homoserine exchange (gln-L in)	gln-L[e] + hom-L[c] --> hom-L[e] + gln-L[c]	Transport, Extracellular	Cytosol, Extra-organism	Irreversible	SLC7A8	8419338
180	L-glutamine/L-isoleucine exchange (gln-L in)	gln-L[e] + ile-L[c] --> ile-L[e] + gln-L[c]	Transport, Extracellular	Cytosol, Extra-organism	Irreversible	SLC7A8	18195088
181	L-glutamine/L-leucine exchange (gln-L in)	gln-L[e] + leu-L[c] --> leu-L[e] + gln-L[c]	Transport, Extracellular	Cytosol, Extra-organism	Irreversible	SLC7A8	18195088
182	L-glutamine/L-lysine exchange (gln-L in)	gln-L[e] + lys-L[c] + na1[e] --> lys-L[e] + gln-L[c] + na1[c]	Transport, Extracellular	Cytosol, Extra-organism	Irreversible	SLC7A6	18195088
183	L-glutamine/L-lysine exchange (gln-L in)	gln-L[e] + lys-L[c] + na1[e] --> lys-L[e] + gln-L[c] + na1[c]	Transport, Extracellular	Cytosol, Extra-organism	Irreversible	SLC7A7	18195088
184	L-glutamine/L-methionine exchange (gln-L in)	gln-L[e] + met-L[c] --> met-L[e] + gln-L[c]	Transport, Extracellular	Cytosol, Extra-organism	Irreversible	SLC7A8	18195088
185	L-glutamine/ornithine exchange (gln-L in)	gln-L[e] + orn[c] + na1[e] --> orn[e] + gln-L[c] + na1[c]	Transport, Extracellular	Cytosol, Extra-organism	Irreversible	SLC7A6	18195088
186	L-glutamine/ornithine exchange (gln-L in)	gln-L[e] + orn[c] + na1[e] --> orn[e] + gln-L[c] + na1[c]	Transport, Extracellular	Cytosol, Extra-organism	Irreversible	SLC7A7	18195088
187	L-glutamine/L-phenylalanine exchange (gln-L in)	gln-L[e] + phe-L[c] --> phe-L[e] + gln-L[c]	Transport, Extracellular	Cytosol, Extra-organism	Irreversible	SLC7A8	18195088
188	L-glutamine/L-serine exchange (gln-L in)	gln-L[e] + ser-L[c] --> ser-L[e] + gln-L[c]	Transport, Extracellular	Cytosol, Extra-organism	Irreversible	SLC7A8	18195088
189	L-glutamine transport in via sodium symport	gln-L[e] + na1[e] --> gln-L[c] + na1[c]	Transport, Extracellular	Cytosol, Extra-organism	Irreversible	SLC38A1	18195088
190	L-glutamine transport in via sodium symport	gln-L[e] + na1[e] --> gln-L[c] + na1[c]	Transport, Extracellular	Cytosol, Extra-organism	Irreversible	SLC38A2	18195088
191	L-glutamine transport in via sodium symport and proton antiport	gln-L[e] + na1[e] + h[c] <==> gln-L[c] + na1[c] + h[e]	Transport, Extracellular	Cytosol, Extra-organism	Reversible	SLC38A3	18195088
192	L-glutamine transport in via sodium symport and proton antiport	gln-L[e] + na1[e] + h[c] <==> gln-L[c] + na1[c] + h[e]	Transport, Extracellular	Cytosol, Extra-organism	Reversible	SLC38A5	18195088
193	L-glutamine transport in via sodium symport	gln-L[e] + na1[e] --> gln-L[c] + na1[c]	Transport, Extracellular	Cytosol, Extra-organism	Reversible	SLC6A14	18195088
194	L-glutamine transport in via sodium symport	gln-L[e] + na1[e] --> gln-L[c] + na1[c]	Transport, Extracellular	Cytosol, Extra-organism	Irreversible	SLC6A19	18195088
195	L-glutamine/L-threonine exchange (gln-L in)	gln-L[e] + thr-L[c] --> thr-L[e] + gln-L[c]	Transport, Extracellular	Cytosol, Extra-organism	Irreversible	SLC7A8	18195088
196	L-glutamine/L-tryptophan exchange (gln-L in)	gln-L[e] + trp-L[c] --> trp-L[e] + gln-L[c]	Transport, Extracellular	Cytosol, Extra-organism	Irreversible	SLC7A8	18195088
197	L-glutamine/L-tyrosine exchange (gln-L in)	gln-L[e] + tyr-L[c] --> tyr-L[e] + gln-L[c]	Transport, Extracellular	Cytosol, Extra-organism	Irreversible	SLC7A8	18195088
198	L-glutamine/L-valine exchange (gln-L in)	gln-L[e] + val-L[c] --> val-L[e] + gln-L[c]	Transport, Extracellular	Cytosol, Extra-organism	Irreversible	SLC7A8	18195088
199	Glutamate transport via Na, H symport and K antiport	glu-L[e] + h[e] + k[c] + (3) na1[e] --> glu-L[c] + h[c] + k[e] + (3) na1[c]	Transport, Extracellular	Cytosol, Extra-organism	Irreversible	SLC1A2	14530974
200	Glutamate transport via Na, H symport and K antiport	glu-L[e] + h[e] + k[c] + (3) na1[e] --> glu-L[c] + h[c] + k[e] + (3) na1[c]	Transport, Extracellular	Cytosol, Extra-organism	Irreversible	SLC1A3	14530974
201	Glutamate transport via Na, H symport and K antiport	glu-L[e] + h[e] + k[c] + (3) na1[e] --> glu-L[c] + h[c] + k[e] + (3) na1[c]	Transport, Extracellular	Cytosol, Extra-organism	Irreversible	SLC1A6	14530974
202	Glutamate transport via Na, H symport and K antiport	glu-L[e] + h[e] + k[c] + (3) na1[e] --> glu-L[c] + h[c] + k[e] + (3) na1[c]	Transport, Extracellular	Cytosol, Extra-organism	Irreversible	SLC1A7	14530974
203	glycine/L-alanine reversible exchange	gly[e] + ala-L[c] <==> ala-L[e] + gly[c]	Transport, Extracellular	Cytosol, Extra-organism	Reversible	SLC7A10	18195088
204	glycine/L-alanine exchange (gly in)	gly[e] + ala-L[c] --> ala-L[e] + gly[c]	Transport, Extracellular	Cytosol, Extra-organism	Irreversible	SLC7A8	18195088
205	glycine/L-asparagine exchange (gly in)	gly[e] + asn-L[c] --> asn-L[e] + gly[c]	Transport, Extracellular	Cytosol, Extra-organism	Irreversible	SLC7A8	18195088
206	glycine/B-alanine reversible exchange	gly[e] + ala-B[c] <==> ala-B[e] + gly[c]	Transport, Extracellular	Cytosol, Extra-organism	Reversible	SLC7A10	18195088
207	betaine transport in via proton symport	glyb[e] + h[e] --> glyb[c] + h[c]	Transport, Extracellular	Cytosol, Extra-organism	Irreversible	SLC36A2	18195088
208	betaine transport in via sodium and chloride symport	glyb[e] + na1[e] + cl[e] --> glyb[c] + na1[c] + cl[c]	Transport, Extracellular	Cytosol, Extra-organism	Irreversible	SLC6A20	18195088
209	glycine/L-citrulline exchange (gly in)	gly[e] + citr-L[c] --> citr-L[e] + gly[c]	Transport, Extracellular	Cytosol, Extra-organism	Irreversible	SLC7A8	18195088
210	glycine/L-cysteine reversible exchange	gly[e] + cys-L[c] <==> cys-L[e] + gly[c]	Transport, Extracellular	Cytosol, Extra-organism	Reversible	SLC7A10	18195088
211	glycine/L-cysteine exchange (gly in)	gly[e] + cys-L[c] --> cys-L[e] + gly[c]	Transport, Extracellular	Cytosol, Extra-organism	Irreversible	SLC7A8	18195088
212	glycine/L-glutamine exchange (gly in)	gly[e] + gln-L[c] --> gln-L[e] + gly[c]	Transport, Extracellular	Cytosol, Extra-organism	Irreversible	SLC7A8	18195088
213	glycine/L-homoserine reversible exchange	gly[e] + hom-L[c] <==> hom-L[e] + gly[c]	Transport, Extracellular	Cytosol, Extra-organism	Reversible	SLC7A10	18195088
214	glycine/L-homoserine exchange (gly in)	gly[e] + hom-L[c] --> hom-L[e] + gly[c]	Transport, Extracellular	Cytosol, Extra-organism	Irreversible	SLC7A8	18195088
215	glycine/L-isoleucine exchange (gly in)	gly[e] + ile-L[c] --> ile-L[e] + gly[c]	Transport, Extracellular	Cytosol, Extra-organism	Irreversible	SLC7A8	18195088
216	glycine/L-leucine exchange (gly in)	gly[e] + leu-L[c] --> leu-L[e] + gly[c]	Transport, Extracellular	Cytosol, Extra-organism	Irreversible	SLC7A8	18195088
217	glycine/L-methionine exchange (gly in)	gly[e] + met-L[c] --> met-L[e] + gly[c]	Transport, Extracellular	Cytosol, Extra-organism	Irreversible	SLC7A8	18195088
218	glycine/L-phenylalanine exchange (gly in)	gly[e] + phe-L[c] --> phe-L[e] + gly[c]	Transport, Extracellular	Cytosol, Extra-organism	Irreversible	SLC7A8	18195088
219	glycine/L-serine reversible exchange	gly[e] + ser-L[c] <==> ser-L[e] + gly[c]	Transport, Extracellular	Cytosol, Extra-organism	Reversible	SLC7A10	18195088
220	glycine/L-serine exchange (gly in)	gly[e] + ser-L[c] --> ser-L[e] + gly[c]	Transport, Extracellular	Cytosol, Extra-organism	Irreversible	SLC7A8	18195088
221	glycine transport in via proton symport	gly[e] + h[e] --> gly[c] + h[c]	Transport, Extracellular	Cytosol, Extra-organism	Irreversible	SLC36A1	18195088
222	glycine transport in via proton symport	gly[e] + h[e] --> gly[c] + h[c]	Transport, Extracellular	Cytosol, Extra-organism	Irreversible	SLC36A2	18195088
223	glycine transport in via sodium symport	gly[e] + na1[e] --> gly[c] + na1[c]	Transport, Extracellular	Cytosol, Extra-organism	Irreversible	SLC38A2	18195088
224	glycine transport in via sodium symport	gly[e] + na1[e] --> gly[c] + na1[c]	Transport, Extracellular	Cytosol, Extra-organism	Reversible	SLC6A14	18195088
225	glycine transport in via sodium symport	gly[e] + na1[e] --> gly[c] + na1[c]	Transport, Extracellular	Cytosol, Extra-organism	Irreversible	SLC6A19	18195088
226	glycine/L-threonine reversible exchange	gly[e] + thr-L[c] <==> thr-L[e] + gly[c]	Transport, Extracellular	Cytosol, Extra-organism	Reversible	SLC7A10	18195088
227	glycine/L-threonine exchange (gly in)	gly[e] + thr-L[c] --> thr-L[e] + gly[c]	Transport, Extracellular	Cytosol, Extra-organism	Irreversible	SLC7A8	18195088
228	glycine/L-tryptophan exchange (gly in)	gly[e] + trp-L[c] --> trp-L[e] + gly[c]	Transport, Extracellular	Cytosol, Extra-organism	Irreversible	SLC7A8	18195088
229	glycine/L-tyrosine exchange (gly in)	gly[e] + tyr-L[c] --> tyr-L[e] + gly[c]	Transport, Extracellular	Cytosol, Extra-organism	Irreversible	SLC7A8	18195088
230	glycine/L-valine exchange (gly in)	gly[e] + val-L[c] --> val-L[e] + gly[c]	Transport, Extracellular	Cytosol, Extra-organism	Irreversible	SLC7A8	18195088
231	L-histidine/3,4-Dihydroxy-L-phenylalanine exchange (his-L in)	his-L[e] + 34dhphe[c] --> 34dhphe[e] + his-L[c]	Transport, Extracellular	Cytosol, Extra-organism	Irreversible	SLC7A5	14770310
232	L-histidine/L-citrulline exchange (his-L in)	his-L[e] + citr-L[c] --> citr-L[e] + his-L[c]	Transport, Extracellular	Cytosol, Extra-organism	Irreversible	SLC7A5	19322909
233	L-histidine/L-citrulline exchange (his-L in)	his-L[e] + citr-L[c] + na1[e] --> citr-L[e] + his-L[c] + na1[c]	Transport, Extracellular	Cytosol, Extra-organism	Irreversible	SLC7A9	19322909
234	L-histidine/L-isoleucine exchange (his-L in)	his-L[e] + ile-L[c] --> ile-L[e] + his-L[c]	Transport, Extracellular	Cytosol, Extra-organism	Irreversible	SLC7A5	18195088
235	L-histidine/L-isoleucine exchange (his-L in)	his-L[e] + ile-L[c] + na1[e] --> ile-L[e] + his-L[c] + na1[c]	Transport, Extracellular	Cytosol, Extra-organism	Irreversible	SLC7A9	18195088
236	L-histidine/L-leucine exchange (his-L in)	his-L[e] + leu-L[c] --> leu-L[e] + his-L[c]	Transport, Extracellular	Cytosol, Extra-organism	Irreversible	SLC7A5	18195088
237	L-histidine/L-leucine exchange (his-L in)	his-L[e] + leu-L[c] + na1[e] --> leu-L[e] + his-L[c] + na1[c]	Transport, Extracellular	Cytosol, Extra-organism	Irreversible	SLC7A9	18195088
238	L-histidine/L-methionine exchange (his-L in)	his-L[e] + met-L[c] --> met-L[e] + his-L[c]	Transport, Extracellular	Cytosol, Extra-organism	Irreversible	SLC7A5	18195088
239	L-histidine/L-methionine exchange (his-L in)	his-L[e] + met-L[c] + na1[e] --> met-L[e] + his-L[c] + na1[c]	Transport, Extracellular	Cytosol, Extra-organism	Irreversible	SLC7A9	18195088
240	L-histidine/L-phenylalanine exchange (his-L in)	his-L[e] + phe-L[c] --> phe-L[e] + his-L[c]	Transport, Extracellular	Cytosol, Extra-organism	Irreversible	SLC7A5	18195088
241	L-histidine/L-phenylalanine exchange (his-L in)	his-L[e] + phe-L[c] + na1[e] --> phe-L[e] + his-L[c] + na1[c]	Transport, Extracellular	Cytosol, Extra-organism	Irreversible	SLC7A9	18195088
242	L-histidine transport in via sodium symport	his-L[e] + na1[e] --> his-L[c] + na1[c]	Transport, Extracellular	Cytosol, Extra-organism	Irreversible	SLC38A1	18195088
243	L-histidine transport in via sodium symport and proton antiport	his-L[e] + na1[e] + h[c] <==> his-L[c] + na1[c] + h[e]	Transport, Extracellular	Cytosol, Extra-organism	Reversible	SLC38A3	18195088
244	L-histidine transport in via sodium symport	his-L[e] + na1[e] --> his-L[c] + na1[c]	Transport, Extracellular	Cytosol, Extra-organism	Irreversible	SLC38A4	18195088
245	L-histidine transport in via sodium symport and proton antiport	his-L[e] + na1[e] + h[c] <==> his-L[c] + na1[c] + h[e]	Transport, Extracellular	Cytosol, Extra-organism	Reversible	SLC38A5	18195088
246	L-histidine transport in via sodium symport	his-L[e] + na1[e] --> his-L[c] + na1[c]	Transport, Extracellular	Cytosol, Extra-organism	Reversible	SLC6A14	18195088
247	L-histidine transport in via sodium symport	his-L[e] + na1[e] --> his-L[c] + na1[c]	Transport, Extracellular	Cytosol, Extra-organism	Irreversible	SLC6A19	18195088
248	L-histidine transport via diffusion (extracellular to cytosol)	his-L[e] --> his-L[c]	Transport, Extracellular	Cytosol, Extra-organism	Irreversible	SLC7A2	18195088
249	L-histidine transport via diffusion (extracellular to cytosol)	his-L[e] --> his-L[c]	Transport, Extracellular	Cytosol, Extra-organism	Irreversible	SLC7A3	18195088
250	L-histidine/T4 exchange (his-L in)	his-L[e] + thyox-L[c] --> thyox-L[e] + his-L[c]	Transport, Extracellular	Cytosol, Extra-organism	Irreversible	SLC7A5	18195088
251	L-histidine/T3 exchange (his-L in)	his-L[e] + triodthy[c] --> triodthy[e] + his-L[c]	Transport, Extracellular	Cytosol, Extra-organism	Irreversible	SLC7A5	18195088
252	L-histidine/L-tryptophan exchange (his-L in)	his-L[e] + trp-L[c] --> trp-L[e] + his-L[c]	Transport, Extracellular	Cytosol, Extra-organism	Irreversible	SLC7A5	18195088
253	L-histidine/L-tryptophan exchange (his-L in)	his-L[e] + trp-L[c] + na1[e] --> trp-L[e] + his-L[c] + na1[c]	Transport, Extracellular	Cytosol, Extra-organism	Irreversible	SLC7A9	18195088
254	L-histidine/L-tyrosine exchange (his-L in)	his-L[e] + tyr-L[c] --> tyr-L[e] + his-L[c]	Transport, Extracellular	Cytosol, Extra-organism	Irreversible	SLC7A5	18195088
255	L-histidine/L-tyrosine exchange (his-L in)	his-L[e] + tyr-L[c] + na1[e] --> tyr-L[e] + his-L[c] + na1[c]	Transport, Extracellular	Cytosol, Extra-organism	Irreversible	SLC7A9	18195088
256	L-histidine/L-valine exchange (his-L in)	his-L[e] + val-L[c] --> val-L[e] + his-L[c]	Transport, Extracellular	Cytosol, Extra-organism	Irreversible	SLC7A5	18195088
257	L-histidine/L-valine exchange (his-L in)	his-L[e] + val-L[c] + na1[e] --> val-L[e] + his-L[c] + na1[c]	Transport, Extracellular	Cytosol, Extra-organism	Irreversible	SLC7A9	18195088
258	L-homoserine/L-alanine NA-dependent exchange (hom-L in)	hom-L[e] + ala-L[c] + na1[e] --> ala-L[e] + hom-L[c] + na1[c]	Transport, Extracellular	Cytosol, Extra-organism	Irreversible	SLC1A4	8419338
259	L-homoserine/L-alanine NA-dependent exchange (hom-L in)	hom-L[e] + ala-L[c] + na1[e] --> ala-L[e] + hom-L[c] + na1[c]	Transport, Extracellular	Cytosol, Extra-organism	Irreversible	SLC1A5	8419338
260	L-homoserine/L-alanine reversible exchange	hom-L[e] + ala-L[c] <==> ala-L[e] + hom-L[c]	Transport, Extracellular	Cytosol, Extra-organism	Reversible	SLC7A10	18195088
261	L-homoserine/L-alanine exchange (hom-L in)	hom-L[e] + ala-L[c] --> ala-L[e] + hom-L[c]	Transport, Extracellular	Cytosol, Extra-organism	Irreversible	SLC7A8	8419338
262	L-homoserine/L-asparagine NA-dependent exchange (hom-L in)	hom-L[e] + asn-L[c] + na1[e] --> asn-L[e] + hom-L[c] + na1[c]	Transport, Extracellular	Cytosol, Extra-organism	Irreversible	SLC1A5	8419338
263	L-homoserine/L-asparagine exchange (hom-L in)	hom-L[e] + asn-L[c] --> asn-L[e] + hom-L[c]	Transport, Extracellular	Cytosol, Extra-organism	Irreversible	SLC7A8	8419338
264	L-homoserine/B-alanine reversible exchange	hom-L[e] + ala-B[c] <==> ala-B[e] + hom-L[c]	Transport, Extracellular	Cytosol, Extra-organism	Reversible	SLC7A10	18195088
265	L-homoserine/L-citrulline exchange (hom-L in)	hom-L[e] + citr-L[c] --> citr-L[e] + hom-L[c]	Transport, Extracellular	Cytosol, Extra-organism	Irreversible	SLC7A8	19322909
266	L-homoserine/L-cysteine NA-dependent exchange (hom-L in)	hom-L[e] + cys-L[c] + na1[e] --> cys-L[e] + hom-L[c] + na1[c]	Transport, Extracellular	Cytosol, Extra-organism	Irreversible	SLC1A4	8419338
267	L-homoserine/L-cysteine NA-dependent exchange (hom-L in)	hom-L[e] + cys-L[c] + na1[e] --> cys-L[e] + hom-L[c] + na1[c]	Transport, Extracellular	Cytosol, Extra-organism	Irreversible	SLC1A5	8419338
268	L-homoserine/L-cysteine reversible exchange	hom-L[e] + cys-L[c] <==> cys-L[e] + hom-L[c]	Transport, Extracellular	Cytosol, Extra-organism	Reversible	SLC7A10	18195088
269	L-homoserine/L-cysteine exchange (hom-L in)	hom-L[e] + cys-L[c] --> cys-L[e] + hom-L[c]	Transport, Extracellular	Cytosol, Extra-organism	Irreversible	SLC7A8	18195088
270	L-homoserine/L-glutamine NA-dependent exchange (hom-L in)	hom-L[e] + gln-L[c] + na1[e] --> gln-L[e] + hom-L[c] + na1[c]	Transport, Extracellular	Cytosol, Extra-organism	Irreversible	SLC1A5	8419338
271	L-homoserine/L-glutamine exchange (hom-L in)	hom-L[e] + gln-L[c] --> gln-L[e] + hom-L[c]	Transport, Extracellular	Cytosol, Extra-organism	Irreversible	SLC7A8	18195088
272	L-homoserine/glycine exchange (hom-L in)	hom-L[e] + gly[c] --> gly[e] + hom-L[c]	Transport, Extracellular	Cytosol, Extra-organism	Irreversible	SLC7A8	18195088
273	L-homoserine/glycine reversible exchange	hom-L[e] + gly[c] <==> gly[e] + hom-L[c]	Transport, Extracellular	Cytosol, Extra-organism	Reversible	SLC7A8	8419338
274	L-homoserine/L-isoleucine exchange (hom-L in)	hom-L[e] + ile-L[c] --> ile-L[e] + hom-L[c]	Transport, Extracellular	Cytosol, Extra-organism	Irreversible	SLC7A8	18195088
275	L-homoserine/L-leucine exchange (hom-L in)	hom-L[e] + leu-L[c] --> leu-L[e] + hom-L[c]	Transport, Extracellular	Cytosol, Extra-organism	Irreversible	SLC7A8	18195088
276	L-homoserine/L-methionine exchange (hom-L in)	hom-L[e] + met-L[c] --> met-L[e] + hom-L[c]	Transport, Extracellular	Cytosol, Extra-organism	Irreversible	SLC7A8	18195088
277	L-homoserine/L-phenylalanine exchange (hom-L in)	hom-L[e] + phe-L[c] --> phe-L[e] + hom-L[c]	Transport, Extracellular	Cytosol, Extra-organism	Irreversible	SLC7A8	18195088
278	L-homoserine/L-serine NA-dependent exchange (hom-L in)	hom-L[e] + ser-L[c] + na1[e] --> ser-L[e] + hom-L[c] + na1[c]	Transport, Extracellular	Cytosol, Extra-organism	Irreversible	SLC1A4	8419338
279	L-homoserine/L-serine NA-dependent exchange (hom-L in)	hom-L[e] + ser-L[c] + na1[e] --> ser-L[e] + hom-L[c] + na1[c]	Transport, Extracellular	Cytosol, Extra-organism	Irreversible	SLC1A5	8419338
280	L-homoserine/L-serine reversible exchange	hom-L[e] + ser-L[c] <==> ser-L[e] + hom-L[c]	Transport, Extracellular	Cytosol, Extra-organism	Reversible	SLC7A10	18195088
281	L-homoserine/L-serine exchange (hom-L in)	hom-L[e] + ser-L[c] --> ser-L[e] + hom-L[c]	Transport, Extracellular	Cytosol, Extra-organism	Irreversible	SLC7A8	18195088
282	L-homoserine/L-threonine NA-dependent exchange (hom-L in)	hom-L[e] + thr-L[c] + na1[e] --> thr-L[e] + hom-L[c] + na1[c]	Transport, Extracellular	Cytosol, Extra-organism	Irreversible	SLC1A4	8419338
283	L-homoserine/L-threonine NA-dependent exchange (hom-L in)	hom-L[e] + thr-L[c] + na1[e] --> thr-L[e] + hom-L[c] + na1[c]	Transport, Extracellular	Cytosol, Extra-organism	Irreversible	SLC1A5	8419338
284	L-homoserine/L-threonine reversible exchange	hom-L[e] + thr-L[c] <==> thr-L[e] + hom-L[c]	Transport, Extracellular	Cytosol, Extra-organism	Reversible	SLC7A10	18195088
285	L-homoserine/L-threonine exchange (hom-L in)	hom-L[e] + thr-L[c] --> thr-L[e] + hom-L[c]	Transport, Extracellular	Cytosol, Extra-organism	Irreversible	SLC7A8	18195088
286	L-homoserine/L-tryptophan exchange (hom-L in)	hom-L[e] + trp-L[c] --> trp-L[e] + hom-L[c]	Transport, Extracellular	Cytosol, Extra-organism	Irreversible	SLC7A8	18195088
287	L-homoserine/L-tyrosine exchange (hom-L in)	hom-L[e] + tyr-L[c] --> tyr-L[e] + hom-L[c]	Transport, Extracellular	Cytosol, Extra-organism	Irreversible	SLC7A8	18195088
288	L-homoserine/L-valine exchange (hom-L in)	hom-L[e] + val-L[c] --> val-L[e] + hom-L[c]	Transport, Extracellular	Cytosol, Extra-organism	Irreversible	SLC7A8	18195088
289	L-hydroxyproline transport in via sodium and chloride symport	4hpro-LT[e] + na1[e] + cl[e] --> 4hpro-LT[c] + na1[c] + cl[c]	Transport, Extracellular	Cytosol, Extra-organism	Irreversible	SLC6A20	18195088
290	L-isoleucine/3,4-Dihydroxy-L-phenylalanine exchange (ile-L in)	ile-L[e] + 34dhphe[c] --> 34dhphe[e] + ile-L[c]	Transport, Extracellular	Cytosol, Extra-organism	Irreversible	SLC7A5	18195088
291	L-isoleucine/L-alanine exchange (ile-L in)	ile-L[e] + ala-L[c] --> ala-L[e] + ile-L[c]	Transport, Extracellular	Cytosol, Extra-organism	Irreversible	SLC7A8	18195088
292	L-isoleucine/L-asparagine exchange (ile-L in)	ile-L[e] + asn-L[c] --> asn-L[e] + ile-L[c]	Transport, Extracellular	Cytosol, Extra-organism	Irreversible	SLC7A8	18195088
293	L-isoleucine/L-citrulline exchange (ile-L in)	ile-L[e] + citr-L[c] --> citr-L[e] + ile-L[c]	Transport, Extracellular	Cytosol, Extra-organism	Irreversible	SLC7A5	18195088
294	L-isoleucine/L-citrulline exchange (ile-L in)	ile-L[e] + citr-L[c] --> citr-L[e] + ile-L[c]	Transport, Extracellular	Cytosol, Extra-organism	Irreversible	SLC7A8	18195088
295	L-isoleucine/L-cysteine exchange (ile-L in)	ile-L[e] + cys-L[c] --> cys-L[e] + ile-L[c]	Transport, Extracellular	Cytosol, Extra-organism	Irreversible	SLC7A8	18195088
296	L-isoleucine/L-glutamine exchange (ile-L in)	ile-L[e] + gln-L[c] --> gln-L[e] + ile-L[c]	Transport, Extracellular	Cytosol, Extra-organism	Irreversible	SLC7A8	18195088
297	L-isoleucine/glycine exchange (ile-L in)	ile-L[e] + gly[c] --> gly[e] + ile-L[c]	Transport, Extracellular	Cytosol, Extra-organism	Irreversible	SLC7A8	18195088
298	L-isoleucine/L-histidine exchange (ile-L in)	ile-L[e] + his-L[c] --> his-L[e] + ile-L[c]	Transport, Extracellular	Cytosol, Extra-organism	Irreversible	SLC7A5	18195088
299	L-isoleucine/L-homoserine exchange (ile-L in)	ile-L[e] + hom-L[c] --> hom-L[e] + ile-L[c]	Transport, Extracellular	Cytosol, Extra-organism	Irreversible	SLC7A8	18195088
300	L-isoleucine/L-leucine exchange (ile-L in)	ile-L[e] + leu-L[c] --> leu-L[e] + ile-L[c]	Transport, Extracellular	Cytosol, Extra-organism	Irreversible	SLC7A5	18195088
301	L-isoleucine/L-leucine exchange (ile-L in)	ile-L[e] + leu-L[c] --> leu-L[e] + ile-L[c]	Transport, Extracellular	Cytosol, Extra-organism	Irreversible	SLC7A8	18195088
302	L-isoleucine/L-methionine exchange (ile-L in)	ile-L[e] + met-L[c] --> met-L[e] + ile-L[c]	Transport, Extracellular	Cytosol, Extra-organism	Irreversible	SLC7A5	18195088
303	L-isoleucine/L-methionine exchange (ile-L in)	ile-L[e] + met-L[c] --> met-L[e] + ile-L[c]	Transport, Extracellular	Cytosol, Extra-organism	Irreversible	SLC7A8	18195088
304	L-isoleucine/L-phenylalanine exchange (ile-L in)	ile-L[e] + phe-L[c] --> phe-L[e] + ile-L[c]	Transport, Extracellular	Cytosol, Extra-organism	Irreversible	SLC7A5	18195088
305	L-isoleucine/L-phenylalanine exchange (ile-L in)	ile-L[e] + phe-L[c] --> phe-L[e] + ile-L[c]	Transport, Extracellular	Cytosol, Extra-organism	Irreversible	SLC7A8	18195088
306	L-isoleucine/L-serine exchange (ile-L in)	ile-L[e] + ser-L[c] --> ser-L[e] + ile-L[c]	Transport, Extracellular	Cytosol, Extra-organism	Irreversible	SLC7A8	18195088
307	L-isoleucine transport in via sodium symport	ile-L[e] + na1[e] --> ile-L[c] + na1[c]	Transport, Extracellular	Cytosol, Extra-organism	Irreversible	SLC6A19	18599538
308	L-isoleucine/L-threonine exchange (ile-L in)	ile-L[e] + thr-L[c] --> thr-L[e] + ile-L[c]	Transport, Extracellular	Cytosol, Extra-organism	Irreversible	SLC7A8	18195088
309	L-isoleucine/T4 exchange (ile-L in)	ile-L[e] + thyox-L[c] --> thyox-L[e] + ile-L[c]	Transport, Extracellular	Cytosol, Extra-organism	Irreversible	SLC7A5	18195088
310	L-isoleucine/T3 exchange (ile-L in)	ile-L[e] + triodthy[c] --> triodthy[e] + ile-L[c]	Transport, Extracellular	Cytosol, Extra-organism	Irreversible	SLC7A5	18195088
311	L-isoleucine/L-tryptophan exchange (ile-L in)	ile-L[e] + trp-L[c] --> trp-L[e] + ile-L[c]	Transport, Extracellular	Cytosol, Extra-organism	Irreversible	SLC7A5	18195088
312	L-isoleucine/L-tryptophan exchange (ile-L in)	ile-L[e] + trp-L[c] --> trp-L[e] + ile-L[c]	Transport, Extracellular	Cytosol, Extra-organism	Irreversible	SLC7A8	18195088
313	L-isoleucine/L-tyrosine exchange (ile-L in)	ile-L[e] + tyr-L[c] --> tyr-L[e] + ile-L[c]	Transport, Extracellular	Cytosol, Extra-organism	Irreversible	SLC7A5	18195088
314	L-isoleucine/L-tyrosine exchange (ile-L in)	ile-L[e] + tyr-L[c] --> tyr-L[e] + ile-L[c]	Transport, Extracellular	Cytosol, Extra-organism	Irreversible	SLC7A8	18195088
315	L-isoleucine/L-valine exchange (ile-L in)	ile-L[e] + val-L[c] --> val-L[e] + ile-L[c]	Transport, Extracellular	Cytosol, Extra-organism	Irreversible	SLC7A5	18195088
316	L-isoleucine/L-valine exchange (ile-L in)	ile-L[e] + val-L[c] --> val-L[e] + ile-L[c]	Transport, Extracellular	Cytosol, Extra-organism	Irreversible	SLC7A8	18195088
317	L-amino-adipate/L-glutamate exchanger	L2aadp[e] + glu-L[c] --> L2aadp[c] + glu-L[e]	Transport, Extracellular	Cytosol, Extra-organism	Irreversible	SLC7A11	9001719
318	L-leucine/3,4-Dihydroxy-L-phenylalanine exchange (leu-L in)	leu-L[e] + 34dhphe[c] --> 34dhphe[e] + leu-L[c]	Transport, Extracellular	Cytosol, Extra-organism	Irreversible	SLC7A5	18195088
319	L-leucine/L-alanine exchange (leu-L in)	leu-L[e] + ala-L[c] --> ala-L[e] + leu-L[c]	Transport, Extracellular	Cytosol, Extra-organism	Irreversible	SLC7A8	18195088
320	L-leucine/L-arginine exchange (leu-L in)	leu-L[e] + arg-L[c] + na1[e] --> arg-L[e] + leu-L[c] + na1[c]	Transport, Extracellular	Cytosol, Extra-organism	Irreversible	SLC7A6	18195088
321	L-leucine/L-arginine exchange (leu-L in)	leu-L[e] + arg-L[c] + na1[e] --> arg-L[e] + leu-L[c] + na1[c]	Transport, Extracellular	Cytosol, Extra-organism	Irreversible	SLC7A7	18195088
322	L-leucine/L-asparagine exchange (leu-L in)	leu-L[e] + asn-L[c] --> asn-L[e] + leu-L[c]	Transport, Extracellular	Cytosol, Extra-organism	Irreversible	SLC7A8	18195088
323	L-leucine/L-citrulline exchange (leu-L in)	leu-L[e] + citr-L[c] --> citr-L[e] + leu-L[c]	Transport, Extracellular	Cytosol, Extra-organism	Irreversible	SLC7A5	18195088
324	L-leucine/L-citrulline exchange (leu-L in)	leu-L[e] + citr-L[c] --> citr-L[e] + leu-L[c]	Transport, Extracellular	Cytosol, Extra-organism	Irreversible	SLC7A8	18195088
325	L-leucine/L-cysteine exchange (leu-L in)	leu-L[e] + cys-L[c] --> cys-L[e] + leu-L[c]	Transport, Extracellular	Cytosol, Extra-organism	Irreversible	SLC7A8	18195088
326	L-leucine/L-glutamine exchange (leu-L in)	leu-L[e] + gln-L[c] --> gln-L[e] + leu-L[c]	Transport, Extracellular	Cytosol, Extra-organism	Irreversible	SLC7A8	18195088
327	L-leucine/glycine exchange (leu-L in)	leu-L[e] + gly[c] --> gly[e] + leu-L[c]	Transport, Extracellular	Cytosol, Extra-organism	Irreversible	SLC7A8	18195088
328	L-leucine/L-histidine exchange (leu-L in)	leu-L[e] + his-L[c] --> his-L[e] + leu-L[c]	Transport, Extracellular	Cytosol, Extra-organism	Irreversible	SLC7A5	18195088
329	L-leucine/L-histidine exchange (leu-L in)	leu-L[e] + his-L[c] + na1[e] --> his-L[e] + leu-L[c] + na1[c]	Transport, Extracellular	Cytosol, Extra-organism	Irreversible	SLC7A6	18195088
330	L-leucine/L-histidine exchange (leu-L in)	leu-L[e] + his-L[c] + na1[e] --> his-L[e] + leu-L[c] + na1[c]	Transport, Extracellular	Cytosol, Extra-organism	Irreversible	SLC7A7	18195088
331	L-leucine/L-homoserine exchange (leu-L in)	leu-L[e] + hom-L[c] --> hom-L[e] + leu-L[c]	Transport, Extracellular	Cytosol, Extra-organism	Irreversible	SLC7A8	18195088
332	L-leucine/L-isoleucine exchange (leu-L in)	leu-L[e] + ile-L[c] --> ile-L[e] + leu-L[c]	Transport, Extracellular	Cytosol, Extra-organism	Irreversible	SLC7A5	18195088
333	L-leucine/L-isoleucine exchange (leu-L in)	leu-L[e] + ile-L[c] --> ile-L[e] + leu-L[c]	Transport, Extracellular	Cytosol, Extra-organism	Irreversible	SLC7A8	18195088
334	L-leucine/L-lysine exchange (leu-L in)	leu-L[e] + lys-L[c] + na1[e] --> lys-L[e] + leu-L[c] + na1[c]	Transport, Extracellular	Cytosol, Extra-organism	Irreversible	SLC7A6	18195088
335	L-leucine/L-lysine exchange (leu-L in)	leu-L[e] + lys-L[c] + na1[e] --> lys-L[e] + leu-L[c] + na1[c]	Transport, Extracellular	Cytosol, Extra-organism	Irreversible	SLC7A7	18195088
336	L-leucine/L-methionine exchange (leu-L in)	leu-L[e] + met-L[c] --> met-L[e] + leu-L[c]	Transport, Extracellular	Cytosol, Extra-organism	Irreversible	SLC7A5	18195088
337	L-leucine/L-methionine exchange (leu-L in)	leu-L[e] + met-L[c] --> met-L[e] + leu-L[c]	Transport, Extracellular	Cytosol, Extra-organism	Irreversible	SLC7A8	18195088
338	L-leucine/ornithine exchange (leu-L in)	leu-L[e] + orn[c] + na1[e] --> orn[e] + leu-L[c] + na1[c]	Transport, Extracellular	Cytosol, Extra-organism	Irreversible	SLC7A7	18195088
339	L-leucine/ornithine exchange (leu-L in)	leu-L[e] + orn[c] + na1[e] --> orn[e] + leu-L[c] + na1[c]	Transport, Extracellular	Cytosol, Extra-organism	Irreversible	SLC7A7	18195088
340	L-leucine/L-phenylalanine exchange (leu-L in)	leu-L[e] + phe-L[c] --> phe-L[e] + leu-L[c]	Transport, Extracellular	Cytosol, Extra-organism	Irreversible	SLC7A5	18195088
341	L-leucine/L-phenylalanine exchange (leu-L in)	leu-L[e] + phe-L[c] --> phe-L[e] + leu-L[c]	Transport, Extracellular	Cytosol, Extra-organism	Irreversible	SLC7A8	18195088
342	L-leucine/L-serine exchange (leu-L in)	leu-L[e] + ser-L[c] --> ser-L[e] + leu-L[c]	Transport, Extracellular	Cytosol, Extra-organism	Irreversible	SLC7A8	18195088
343	L-leucine transport in via sodium symport	leu-L[e] + na1[e] --> leu-L[c] + na1[c]	Transport, Extracellular	Cytosol, Extra-organism	Reversible	SLC6A14	18599538
344	L-leucine transport in via sodium symport	leu-L[e] + na1[e] --> leu-L[c] + na1[c]	Transport, Extracellular	Cytosol, Extra-organism	Reversible	SLC6A15	18599538
345	L-leucine transport in via sodium symport	leu-L[e] + na1[e] --> leu-L[c] + na1[c]	Transport, Extracellular	Cytosol, Extra-organism	Irreversible	SLC6A19	18599538
346	L-leucine/L-threonine exchange (leu-L in)	leu-L[e] + thr-L[c] --> thr-L[e] + leu-L[c]	Transport, Extracellular	Cytosol, Extra-organism	Irreversible	SLC7A8	18195088
347	L-leucine/T4 exchange (leu-L in)	leu-L[e] + thyox-L[c] --> thyox-L[e] + leu-L[c]	Transport, Extracellular	Cytosol, Extra-organism	Irreversible	SLC7A5	18195088
348	L-leucine/T3 exchange (leu-L in)	leu-L[e] + triodthy[c] --> triodthy[e] + leu-L[c]	Transport, Extracellular	Cytosol, Extra-organism	Irreversible	SLC7A5	18195088
349	L-leucine/L-tryptophan exchange (leu-L in)	leu-L[e] + trp-L[c] --> trp-L[e] + leu-L[c]	Transport, Extracellular	Cytosol, Extra-organism	Irreversible	SLC7A5	18195088
350	L-leucine/L-tryptophan exchange (leu-L in)	leu-L[e] + trp-L[c] --> trp-L[e] + leu-L[c]	Transport, Extracellular	Cytosol, Extra-organism	Irreversible	SLC7A8	18195088
351	L-leucine/L-tyrosine exchange (leu-L in)	leu-L[e] + tyr-L[c] --> tyr-L[e] + leu-L[c]	Transport, Extracellular	Cytosol, Extra-organism	Irreversible	SLC7A5	18195088
352	L-leucine/L-tyrosine exchange (leu-L in)	leu-L[e] + tyr-L[c] --> tyr-L[e] + leu-L[c]	Transport, Extracellular	Cytosol, Extra-organism	Irreversible	SLC7A8	18195088
353	L-leucine/L-valine exchange (leu-L in)	leu-L[e] + val-L[c] --> val-L[e] + leu-L[c]	Transport, Extracellular	Cytosol, Extra-organism	Irreversible	SLC7A5	18195088
354	L-leucine/L-valine exchange (leu-L in)	leu-L[e] + val-L[c] --> val-L[e] + leu-L[c]	Transport, Extracellular	Cytosol, Extra-organism	Irreversible	SLC7A8	18195088
355	L-lysine/L-citrulline exchange (lys-L in)	lys-L[e] + citr-L[c] + na1[e] --> citr-L[e] + lys-L[c] + na1[c]	Transport, Extracellular	Cytosol, Extra-organism	Irreversible	SLC7A9	18195088
356	L-lysine/L-isoleucine exchange (lys-L in)	lys-L[e] + ile-L[c] + na1[e] --> ile-L[e] + lys-L[c] + na1[c]	Transport, Extracellular	Cytosol, Extra-organism	Irreversible	SLC7A9	18195088
357	L-lysine/L-leucine exchange (lys-L in)	lys-L[e] + leu-L[c] + na1[e] --> leu-L[e] + lys-L[c] + na1[c]	Transport, Extracellular	Cytosol, Extra-organism	Irreversible	SLC7A9	18195088
358	L-lysine/L-methionine exchange (lys-L in)	lys-L[e] + met-L[c] + na1[e] --> met-L[e] + lys-L[c] + na1[c]	Transport, Extracellular	Cytosol, Extra-organism	Irreversible	SLC7A9	18195088
359	L-lysine/L-phenylalanine exchange (lys-L in)	lys-L[e] + phe-L[c] + na1[e] --> phe-L[e] + lys-L[c] + na1[c]	Transport, Extracellular	Cytosol, Extra-organism	Irreversible	SLC7A9	18195088
360	L-lysine transport in	lys-L[e] --> lys-L[c]	Transport, Extracellular	Cytosol, Extra-organism	Irreversible	SLC38A4	18195088
361	L-arginine transport via diffusion (extracellular to cytosol)	arg-L[e] --> arg-L[c]	Transport, Extracellular	Cytosol, Extra-organism	Irreversible	SLC7A2	18195088
362	L-arginine transport via diffusion (extracellular to cytosol)	arg-L[e] --> arg-L[c]	Transport, Extracellular	Cytosol, Extra-organism	Irreversible	SLC7A3	18195088
363	L-lysine/L-tryptophan exchange (lys-L in)	lys-L[e] + trp-L[c] + na1[e] --> trp-L[e] + lys-L[c] + na1[c]	Transport, Extracellular	Cytosol, Extra-organism	Irreversible	SLC7A9	18195088
364	L-lysine/L-tyrosine exchange (lys-L in)	lys-L[e] + tyr-L[c] + na1[e] --> tyr-L[e] + lys-L[c] + na1[c]	Transport, Extracellular	Cytosol, Extra-organism	Irreversible	SLC7A9	18195088
365	L-lysine/L-valine exchange (lys-L in)	lys-L[e] + val-L[c] + na1[e] --> val-L[e] + lys-L[c] + na1[c]	Transport, Extracellular	Cytosol, Extra-organism	Irreversible	SLC7A9	18195088
366	L-methionine/3,4-Dihydroxy-L-phenylalanine exchange (met-L in)	met-L[e] + 34dhphe[c] --> 34dhphe[e] + met-L[c]	Transport, Extracellular	Cytosol, Extra-organism	Irreversible	SLC7A5	18195088
367	L-methionine/L-alanine exchange (met-L in)	met-L[e] + ala-L[c] --> ala-L[e] + met-L[c]	Transport, Extracellular	Cytosol, Extra-organism	Irreversible	SLC7A8	18195088
368	L-methionine/L-arginine exchange (met-L in)	met-L[e] + arg-L[c] + na1[e] --> arg-L[e] + met-L[c] + na1[c]	Transport, Extracellular	Cytosol, Extra-organism	Irreversible	SLC7A6	18195088
369	L-methionine/L-arginine exchange (met-L in)	met-L[e] + arg-L[c] + na1[e] --> arg-L[e] + met-L[c] + na1[c]	Transport, Extracellular	Cytosol, Extra-organism	Irreversible	SLC7A7	18195088
370	L-methionine/L-asparagine exchange (met-L in)	met-L[e] + asn-L[c] --> asn-L[e] + met-L[c]	Transport, Extracellular	Cytosol, Extra-organism	Irreversible	SLC7A8	18195088
371	L-methionine/L-citrulline exchange (met-L in)	met-L[e] + citr-L[c] --> citr-L[e] + met-L[c]	Transport, Extracellular	Cytosol, Extra-organism	Irreversible	SLC7A5	18195088
372	L-methionine/L-citrulline exchange (met-L in)	met-L[e] + citr-L[c] --> citr-L[e] + met-L[c]	Transport, Extracellular	Cytosol, Extra-organism	Irreversible	SLC7A8	18195088
373	L-methionine/L-cysteine exchange (met-L in)	met-L[e] + cys-L[c] --> cys-L[e] + met-L[c]	Transport, Extracellular	Cytosol, Extra-organism	Irreversible	SLC7A8	18195088
374	L-methionine/L-glutamine exchange (met-L in)	met-L[e] + gln-L[c] --> gln-L[e] + met-L[c]	Transport, Extracellular	Cytosol, Extra-organism	Irreversible	SLC7A8	18195088
375	L-methionine/glycine exchange (met-L in)	met-L[e] + gly[c] --> gly[e] + met-L[c]	Transport, Extracellular	Cytosol, Extra-organism	Irreversible	SLC7A8	18195088
376	L-methionine/L-histidine exchange (met-L in)	met-L[e] + his-L[c] --> his-L[e] + met-L[c]	Transport, Extracellular	Cytosol, Extra-organism	Irreversible	SLC7A5	18195088
377	L-methionine/L-histidine exchange (met-L in)	met-L[e] + his-L[c] + na1[e] --> his-L[e] + met-L[c] + na1[c]	Transport, Extracellular	Cytosol, Extra-organism	Irreversible	SLC7A6	18195088
378	L-methionine/L-histidine exchange (met-L in)	met-L[e] + his-L[c] + na1[e] --> his-L[e] + met-L[c] + na1[c]	Transport, Extracellular	Cytosol, Extra-organism	Irreversible	SLC7A7	18195088
379	L-methionine/L-homoserine exchange (met-L in)	met-L[e] + hom-L[c] --> hom-L[e] + met-L[c]	Transport, Extracellular	Cytosol, Extra-organism	Irreversible	SLC7A8	18195088
380	L-methionine/L-isoleucine exchange (met-L in)	met-L[e] + ile-L[c] --> ile-L[e] + met-L[c]	Transport, Extracellular	Cytosol, Extra-organism	Irreversible	SLC7A5	18195088
381	L-methionine/L-isoleucine exchange (met-L in)	met-L[e] + ile-L[c] --> ile-L[e] + met-L[c]	Transport, Extracellular	Cytosol, Extra-organism	Irreversible	SLC7A8	18195088
382	L-methionine/L-leucine exchange (met-L in)	met-L[e] + leu-L[c] --> leu-L[e] + met-L[c]	Transport, Extracellular	Cytosol, Extra-organism	Irreversible	SLC7A5	18195088
383	L-methionine/L-leucine exchange (met-L in)	met-L[e] + leu-L[c] --> leu-L[e] + met-L[c]	Transport, Extracellular	Cytosol, Extra-organism	Irreversible	SLC7A8	18195088
384	L-methionine/L-lysine exchange (met-L in)	met-L[e] + lys-L[c] + na1[e] --> lys-L[e] + met-L[c] + na1[c]	Transport, Extracellular	Cytosol, Extra-organism	Irreversible	SLC7A6	18195088
385	L-methionine/L-lysine exchange (met-L in)	met-L[e] + lys-L[c] + na1[e] --> lys-L[e] + met-L[c] + na1[c]	Transport, Extracellular	Cytosol, Extra-organism	Irreversible	SLC7A7	18195088
386	L-methionine/ornithine exchange (met-L in)	met-L[e] + orn[c] + na1[e] --> orn[e] + met-L[c] + na1[c]	Transport, Extracellular	Cytosol, Extra-organism	Irreversible	SLC7A6	18195088
387	L-methionine/ornithine exchange (met-L in)	met-L[e] + orn[c] + na1[e] --> orn[e] + met-L[c] + na1[c]	Transport, Extracellular	Cytosol, Extra-organism	Irreversible	SLC7A7	18195088
388	L-methionine/L-phenylalanine exchange (met-L in)	met-L[e] + phe-L[c] --> phe-L[e] + met-L[c]	Transport, Extracellular	Cytosol, Extra-organism	Irreversible	SLC7A5	18195088
389	L-methionine/L-phenylalanine exchange (met-L in)	met-L[e] + phe-L[c] --> phe-L[e] + met-L[c]	Transport, Extracellular	Cytosol, Extra-organism	Irreversible	SLC7A8	18195088
390	L-methionine/L-serine exchange (met-L in)	met-L[e] + ser-L[c] --> ser-L[e] + met-L[c]	Transport, Extracellular	Cytosol, Extra-organism	Irreversible	SLC7A8	18195088
391	L-methioinine transport in via sodium symport	met-L[e] + na1[e] --> met-L[c] + na1[c]	Transport, Extracellular	Cytosol, Extra-organism	Irreversible	SLC38A4	18195088
392	L-methioinine transport in via sodium symport	met-L[e] + na1[e] --> met-L[c] + na1[c]	Transport, Extracellular	Cytosol, Extra-organism	Reversible	SLC6A14	18195088
393	L-methioinine transport in via sodium symport	met-L[e] + na1[e] --> met-L[c] + na1[c]	Transport, Extracellular	Cytosol, Extra-organism	Reversible	SLC6A15	18195088
394	L-methioinine transport in via sodium symport	met-L[e] + na1[e] --> met-L[c] + na1[c]	Transport, Extracellular	Cytosol, Extra-organism	Irreversible	SLC6A19	18195088
395	L-methionine/L-threonine exchange (met-L in)	met-L[e] + thr-L[c] --> thr-L[e] + met-L[c]	Transport, Extracellular	Cytosol, Extra-organism	Irreversible	SLC7A8	18195088
396	L-methionine/T4 exchange (met-L in)	met-L[e] + thyox-L[c] --> thyox-L[e] + met-L[c]	Transport, Extracellular	Cytosol, Extra-organism	Irreversible	SLC7A5	18195088
397	L-methionine/T3 exchange (met-L in)	met-L[e] + triodthy[c] --> triodthy[e] + met-L[c]	Transport, Extracellular	Cytosol, Extra-organism	Irreversible	SLC7A5	18195088
398	L-methionine/L-tryptophan exchange (met-L in)	met-L[e] + trp-L[c] --> trp-L[e] + met-L[c]	Transport, Extracellular	Cytosol, Extra-organism	Irreversible	SLC7A5	18195088
399	L-methionine/L-tryptophan exchange (met-L in)	met-L[e] + trp-L[c] --> trp-L[e] + met-L[c]	Transport, Extracellular	Cytosol, Extra-organism	Irreversible	SLC7A8	18195088
400	L-methionine/L-tyrosine exchange (met-L in)	met-L[e] + tyr-L[c] --> tyr-L[e] + met-L[c]	Transport, Extracellular	Cytosol, Extra-organism	Irreversible	SLC7A5	18195088
401	L-methionine/L-tyrosine exchange (met-L in)	met-L[e] + tyr-L[c] --> tyr-L[e] + met-L[c]	Transport, Extracellular	Cytosol, Extra-organism	Irreversible	SLC7A8	18195088
402	L-methionine/L-valine exchange (met-L in)	met-L[e] + val-L[c] --> val-L[e] + met-L[c]	Transport, Extracellular	Cytosol, Extra-organism	Irreversible	SLC7A5	18195088
403	L-methionine/L-valine exchange (met-L in)	met-L[e] + val-L[c] --> val-L[e] + met-L[c]	Transport, Extracellular	Cytosol, Extra-organism	Irreversible	SLC7A8	18195088
404	ornithine/L-citrulline exchange (orn in)	orn[e] + citr-L[c] + na1[e] --> citr-L[e] + orn[c] + na1[c]	Transport, Extracellular	Cytosol, Extra-organism	Irreversible	SLC7A9	18195088
405	ornithine/L-isoleucine exchange (orn in)	orn[e] + ile-L[c] + na1[e] --> ile-L[e] + orn[c] + na1[c]	Transport, Extracellular	Cytosol, Extra-organism	Irreversible	SLC7A9	18195088
406	ornithine/L-leucine exchange (orn in)	orn[e] + leu-L[c] + na1[e] --> leu-L[e] + orn[c] + na1[c]	Transport, Extracellular	Cytosol, Extra-organism	Irreversible	SLC7A9	18195088
407	ornithine/L-methionine exchange (orn in)	orn[e] + met-L[c] + na1[e] --> met-L[e] + orn[c] + na1[c]	Transport, Extracellular	Cytosol, Extra-organism	Irreversible	SLC7A9	18195088
408	ornithine/L-phenylalanine exchange (orn in)	orn[e] + phe-L[c] + na1[e] --> phe-L[e] + orn[c] + na1[c]	Transport, Extracellular	Cytosol, Extra-organism	Irreversible	SLC7A9	18195088
409	L-ornithine transport in via sodium symport	orn[e] + na1[e] --> orn[c] + na1[c]	Transport, Extracellular	Cytosol, Extra-organism	Reversible	SLC6A14	18599538
410	ornithine transport via diffusion (extracellular to cytosol)	orn[e] --> orn[c]	Transport, Extracellular	Cytosol, Extra-organism	Irreversible	SLC7A2	18195088
411	ornithine transport via diffusion (extracellular to cytosol)	orn[e] --> orn[c]	Transport, Extracellular	Cytosol, Extra-organism	Irreversible	SLC7A3	18195088
412	ornithine/L-tryptophan exchange (orn in)	orn[e] + trp-L[c] + na1[e] --> trp-L[e] + orn[c] + na1[c]	Transport, Extracellular	Cytosol, Extra-organism	Irreversible	SLC7A9	18195088
413	ornithine/L-tyrosine exchange (orn in)	orn[e] + tyr-L[c] + na1[e] --> tyr-L[e] + orn[c] + na1[c]	Transport, Extracellular	Cytosol, Extra-organism	Irreversible	SLC7A9	18195088
414	ornithine/L-valine exchange (orn in)	orn[e] + val-L[c] + na1[e] --> val-L[e] + orn[c] + na1[c]	Transport, Extracellular	Cytosol, Extra-organism	Irreversible	SLC7A9	18195088
415	L-phenylalanine/3,4-Dihydroxy-L-phenylalanine exchange (phe-L in)	phe-L[e] + 34dhphe[c] --> 34dhphe[e] + phe-L[c]	Transport, Extracellular	Cytosol, Extra-organism	Irreversible	SLC7A5	18195088
416	L-phenylalanine/L-alanine exchange (phe-L in)	phe-L[e] + ala-L[c] --> ala-L[e] + phe-L[c]	Transport, Extracellular	Cytosol, Extra-organism	Irreversible	SLC7A8	18195088
417	L-phenylalanine/L-asparagine exchange (phe-L in)	phe-L[e] + asn-L[c] --> asn-L[e] + phe-L[c]	Transport, Extracellular	Cytosol, Extra-organism	Irreversible	SLC7A8	18195088
418	L-phenylalanine/L-citrulline exchange (phe-L in)	phe-L[e] + citr-L[c] --> citr-L[e] + phe-L[c]	Transport, Extracellular	Cytosol, Extra-organism	Irreversible	SLC7A5	18195088
419	L-phenylalanine/L-citrulline exchange (phe-L in)	phe-L[e] + citr-L[c] --> citr-L[e] + phe-L[c]	Transport, Extracellular	Cytosol, Extra-organism	Irreversible	SLC7A8	18195088
420	L-phenylalanine/L-cysteine exchange (phe-L in)	phe-L[e] + cys-L[c] --> cys-L[e] + phe-L[c]	Transport, Extracellular	Cytosol, Extra-organism	Irreversible	SLC7A8	18195088
421	L-phenylalanine/L-glutamine exchange (phe-L in)	phe-L[e] + gln-L[c] --> gln-L[e] + phe-L[c]	Transport, Extracellular	Cytosol, Extra-organism	Irreversible	SLC7A8	18195088
422	L-phenylalanine/glycine exchange (phe-L in)	phe-L[e] + gly[c] --> gly[e] + phe-L[c]	Transport, Extracellular	Cytosol, Extra-organism	Irreversible	SLC7A8	18195088
423	L-phenylalanine/L-histidine exchange (phe-L in)	phe-L[e] + his-L[c] --> his-L[e] + phe-L[c]	Transport, Extracellular	Cytosol, Extra-organism	Irreversible	SLC7A5	18195088
424	L-phenylalanine/L-homoserine exchange (phe-L in)	phe-L[e] + hom-L[c] --> hom-L[e] + phe-L[c]	Transport, Extracellular	Cytosol, Extra-organism	Irreversible	SLC7A8	18195088
425	L-phenylalanine/L-isoleucine exchange (phe-L in)	phe-L[e] + ile-L[c] --> ile-L[e] + phe-L[c]	Transport, Extracellular	Cytosol, Extra-organism	Irreversible	SLC7A5	18195088
426	L-phenylalanine/L-isoleucine exchange (phe-L in)	phe-L[e] + ile-L[c] --> ile-L[e] + phe-L[c]	Transport, Extracellular	Cytosol, Extra-organism	Irreversible	SLC7A8	18195088
427	L-phenylalanine/L-leucine exchange (phe-L in)	phe-L[e] + leu-L[c] --> leu-L[e] + phe-L[c]	Transport, Extracellular	Cytosol, Extra-organism	Irreversible	SLC7A5	18195088
428	L-phenylalanine/L-leucine exchange (phe-L in)	phe-L[e] + leu-L[c] --> leu-L[e] + phe-L[c]	Transport, Extracellular	Cytosol, Extra-organism	Irreversible	SLC7A8	18195088
429	L-phenylalanine/L-methionine exchange (phe-L in)	phe-L[e] + met-L[c] --> met-L[e] + phe-L[c]	Transport, Extracellular	Cytosol, Extra-organism	Irreversible	SLC7A5	18195088
430	L-phenylalanine/L-methionine exchange (phe-L in)	phe-L[e] + met-L[c] --> met-L[e] + phe-L[c]	Transport, Extracellular	Cytosol, Extra-organism	Irreversible	SLC7A8	18195088
431	L-phenylalanine/L-serine exchange (phe-L in)	phe-L[e] + ser-L[c] --> ser-L[e] + phe-L[c]	Transport, Extracellular	Cytosol, Extra-organism	Irreversible	SLC7A8	18195088
432	L-phenylalanine transport	phe-L[e] <==> phe-L[c]	Transport, Extracellular	Cytosol, Extra-organism	Reversible	SLC16A10	18195088
433	L-phenylalanine transport in via sodium symport	phe-L[e] + na1[e] --> phe-L[c] + na1[c]	Transport, Extracellular	Cytosol, Extra-organism	Reversible	SLC6A14	18599538
434	L-phenylalanine transport in via sodium symport	phe-L[e] + na1[e] --> phe-L[c] + na1[c]	Transport, Extracellular	Cytosol, Extra-organism	Irreversible	SLC6A19	18599538
435	L-phenylalanine transport in via sodium and chloride symport	phe-L[e] + na1[e] + cl[e] --> phe-L[c] + na1[c] + cl[c]	Transport, Extracellular	Cytosol, Extra-organism	Irreversible	SLC6A20	18195088
436	L-phenylalanine/L-threonine exchange (phe-L in)	phe-L[e] + thr-L[c] --> thr-L[e] + phe-L[c]	Transport, Extracellular	Cytosol, Extra-organism	Irreversible	SLC7A8	18195088
437	L-phenylalanine/T4 exchange (phe-L in)	phe-L[e] + thyox-L[c] --> thyox-L[e] + phe-L[c]	Transport, Extracellular	Cytosol, Extra-organism	Irreversible	SLC7A5	18195088
438	L-phenylalanine/T3 exchange (phe-L in)	phe-L[e] + triodthy[c] --> triodthy[e] + phe-L[c]	Transport, Extracellular	Cytosol, Extra-organism	Irreversible	SLC7A5	18195088
439	L-phenylalanine/L-tryptophan exchange (phe-L in)	phe-L[e] + trp-L[c] --> trp-L[e] + phe-L[c]	Transport, Extracellular	Cytosol, Extra-organism	Irreversible	SLC7A5	18195088
440	L-phenylalanine/L-tryptophan exchange (phe-L in)	phe-L[e] + trp-L[c] --> trp-L[e] + phe-L[c]	Transport, Extracellular	Cytosol, Extra-organism	Irreversible	SLC7A8	18195088
441	L-phenylalanine/L-tyrosine exchange (phe-L in)	phe-L[e] + tyr-L[c] --> tyr-L[e] + phe-L[c]	Transport, Extracellular	Cytosol, Extra-organism	Irreversible	SLC7A5	18195088
442	L-phenylalanine/L-tyrosine exchange (phe-L in)	phe-L[e] + tyr-L[c] --> tyr-L[e] + phe-L[c]	Transport, Extracellular	Cytosol, Extra-organism	Irreversible	SLC7A8	18195088
443	L-phenylalanine/L-valine exchange (phe-L in)	phe-L[e] + val-L[c] --> val-L[e] + phe-L[c]	Transport, Extracellular	Cytosol, Extra-organism	Irreversible	SLC7A5	18195088
444	L-phenylalanine/L-valine exchange (phe-L in)	phe-L[e] + val-L[c] --> val-L[e] + phe-L[c]	Transport, Extracellular	Cytosol, Extra-organism	Irreversible	SLC7A8	18195088
445	prostaglandin E2/alpha-ketoglutarate exchange (prostge2 in)	prostge2[e] + akg[c] --> akg[e] + prostge2[c]	Transport, Extracellular	Cytosol, Extra-organism	Irreversible	SLC22A6	17245646
446	prostglandin F2a/alpha-ketoglutarate exchange (prostgf2 in)	prostgf2[e] + akg[c] --> akg[e] + prostgf2[c]	Transport, Extracellular	Cytosol, Extra-organism	Irreversible	SLC22A6	17245646
447	L-proline transport in via proton symport	pro-L[e] + h[e] --> pro-L[c] + h[c]	Transport, Extracellular	Cytosol, Extra-organism	Irreversible	SLC36A1	18195088
448	L-proline transport in via proton symport	pro-L[e] + h[e] --> pro-L[c] + h[c]	Transport, Extracellular	Cytosol, Extra-organism	Irreversible	SLC36A2	18195088
449	L-proline transport in via sodium symport	pro-L[e] + na1[e] --> pro-L[c] + na1[c]	Transport, Extracellular	Cytosol, Extra-organism	Irreversible	SLC38A2	18195088
450	L-proline transport in via sodium symport	pro-L[e] + na1[e] --> pro-L[c] + na1[c]	Transport, Extracellular	Cytosol, Extra-organism	Reversible	SLC6A15	18195088
451	L-proline transport in via sodium and chloride symport	pro-L[e] + na1[e] + cl[e] --> pro-L[c] + na1[c] + cl[c]	Transport, Extracellular	Cytosol, Extra-organism	Irreversible	SLC6A20	18195088
452	sarcosine transport in via proton symport	sarcs[e] + h[e] --> sarcs[c] + h[c]	Transport, Extracellular	Cytosol, Extra-organism	Irreversible	SLC36A1	18195088
453	sarcosine transport in via proton symport	sarcs[e] + h[e] --> sarcs[c] + h[c]	Transport, Extracellular	Cytosol, Extra-organism	Irreversible	SLC36A2	18195088
454	sarcosine transport in via sodium and chloride symport	sarcs[e] + na1[e] + cl[e] --> sarcs[c] + na1[c] + cl[c]	Transport, Extracellular	Cytosol, Extra-organism	Irreversible	SLC6A20	18195088
455	L-serine/L-alanine reversible exchange	ser-L[e] + ala-L[c] <==> ala-L[e] + ser-L[c]	Transport, Extracellular	Cytosol, Extra-organism	Reversible	SLC7A10	18195088
456	L-serine/L-alanine exchange (ser-L in)	ser-L[e] + ala-L[c] --> ala-L[e] + ser-L[c]	Transport, Extracellular	Cytosol, Extra-organism	Irreversible	SLC7A8	18195088
457	L-alanine/L-serine Na-dependent exchange (Ser-L in)	ala-L[c] + na1[e] + ser-L[e] --> ala-L[e] + na1[c] + ser-L[c]	Transport, Extracellular	Cytosol, Extra-organism	Irreversible	SLC1A5	14530974
458	L-serine/L-asparagine exchange (ser-L in)	ser-L[e] + asn-L[c] --> asn-L[e] + ser-L[c]	Transport, Extracellular	Cytosol, Extra-organism	Irreversible	SLC7A8	18195088
459	L-serine/B-alanine reversible exchange	ser-L[e] + ala-B[c] <==> ala-B[e] + ser-L[c]	Transport, Extracellular	Cytosol, Extra-organism	Reversible	SLC7A10	18195088
460	L-serine/L-citrulline exchange (ser-L in)	ser-L[e] + citr-L[c] --> citr-L[e] + ser-L[c]	Transport, Extracellular	Cytosol, Extra-organism	Irreversible	SLC7A8	18195088
461	L-serine/L-cysteine exchange (ser-L in)	ser-L[e] + cys-L[c] --> cys-L[e] + ser-L[c]	Transport, Extracellular	Cytosol, Extra-organism	Irreversible	SLC7A8	18195088
462	L-serine/L-cysteine Na-dependent exchange (Ser-L in)	cys-L[c] + na1[e] + ser-L[e] --> cys-L[e] + na1[c] + ser-L[c]	Transport, Extracellular	Cytosol, Extra-organism	Irreversible	SLC1A5	14530974
463	L-serine/L-glutamine exchange (ser-L in)	ser-L[e] + gln-L[c] --> gln-L[e] + ser-L[c]	Transport, Extracellular	Cytosol, Extra-organism	Irreversible	SLC7A8	18195088
464	L-serine/glycine exchange (ser-L in)	ser-L[e] + gly[c] --> gly[e] + ser-L[c]	Transport, Extracellular	Cytosol, Extra-organism	Irreversible	SLC7A8	18195088
465	L-serine/L-homoserine NA-dependent exchange (ser-L in)	ser-L[e] + hom-L[c] + na1[e] --> hom-L[e] + ser-L[c] + na1[c]	Transport, Extracellular	Cytosol, Extra-organism	Irreversible	SLC1A4	8419338
466	L-serine/L-homoserine NA-dependent exchange (ser-L in)	ser-L[e] + hom-L[c] + na1[e] --> hom-L[e] + ser-L[c] + na1[c]	Transport, Extracellular	Cytosol, Extra-organism	Irreversible	SLC1A5	8419338
467	L-serine/L-homoserine reversible exchange	ser-L[e] + hom-L[c] <==> hom-L[e] + ser-L[c]	Transport, Extracellular	Cytosol, Extra-organism	Reversible	SLC7A10	18195088
468	L-serine/L-homoserine exchange (ser-L in)	ser-L[e] + hom-L[c] --> hom-L[e] + ser-L[c]	Transport, Extracellular	Cytosol, Extra-organism	Irreversible	SLC7A8	18195088
469	L-serine/L-isoleucine exchange (ser-L in)	ser-L[e] + ile-L[c] --> ile-L[e] + ser-L[c]	Transport, Extracellular	Cytosol, Extra-organism	Irreversible	SLC7A8	18195088
470	L-serine/L-leucine exchange (ser-L in)	ser-L[e] + leu-L[c] --> leu-L[e] + ser-L[c]	Transport, Extracellular	Cytosol, Extra-organism	Irreversible	SLC7A8	18195088
471	L-serine/L-methionine exchange (ser-L in)	ser-L[e] + met-L[c] --> met-L[e] + ser-L[c]	Transport, Extracellular	Cytosol, Extra-organism	Irreversible	SLC7A8	18195088
472	L-serine/L-phenylalanine exchange (ser-L in)	ser-L[e] + phe-L[c] --> phe-L[e] + ser-L[c]	Transport, Extracellular	Cytosol, Extra-organism	Irreversible	SLC7A8	18195088
473	L-serine transport in via sodium symport	ser-L[e] + na1[e] --> ser-L[c] + na1[c]	Transport, Extracellular	Cytosol, Extra-organism	Irreversible	SLC38A1	18195088
474	L-serine transport in via sodium symport	ser-L[e] + na1[e] --> ser-L[c] + na1[c]	Transport, Extracellular	Cytosol, Extra-organism	Irreversible	SLC38A4	18195088
475	L-serine transport in via sodium symport and proton antiport	ser-L[e] + na1[e] + h[c] <==> ser-L[c] + na1[c] + h[e]	Transport, Extracellular	Cytosol, Extra-organism	Reversible	SLC38A5	18195088
476	L-serine transport in via sodium symport	ser-L[e] + na1[e] --> ser-L[c] + na1[c]	Transport, Extracellular	Cytosol, Extra-organism	Reversible	SLC6A14	18195088
477	L-serine transport in via sodium symport	ser-L[e] + na1[e] --> ser-L[c] + na1[c]	Transport, Extracellular	Cytosol, Extra-organism	Irreversible	SLC6A19	18195088
478	L-serine/L-threonine reversible exchange	ser-L[e] + thr-L[c] <==> thr-L[e] + ser-L[c]	Transport, Extracellular	Cytosol, Extra-organism	Reversible	SLC7A10	18195088
479	L-serine/L-threonine exchange (ser-L in)	ser-L[e] + thr-L[c] --> thr-L[e] + ser-L[c]	Transport, Extracellular	Cytosol, Extra-organism	Irreversible	SLC7A8	18195088
480	L-serine/L-threonine Na-dependent exchange (Ser-L in)	na1[e] + ser-L[e] + thr-L[c] --> na1[c] + ser-L[c] + thr-L[e]	Transport, Extracellular	Cytosol, Extra-organism	Irreversible	SLC1A5	14530974
481	L-serine/L-tryptophan exchange (ser-L in)	ser-L[e] + trp-L[c] --> trp-L[e] + ser-L[c]	Transport, Extracellular	Cytosol, Extra-organism	Irreversible	SLC7A8	18195088
482	L-serine/L-tyrosine exchange (ser-L in)	ser-L[e] + tyr-L[c] --> tyr-L[e] + ser-L[c]	Transport, Extracellular	Cytosol, Extra-organism	Irreversible	SLC7A8	18195088
483	L-serine/L-valine exchange (ser-L in)	ser-L[e] + val-L[c] --> val-L[e] + ser-L[c]	Transport, Extracellular	Cytosol, Extra-organism	Irreversible	SLC7A8	18195088
484	taurocholate/alpha-ketoglutarate exchange (tchola in)	tchola[e] + akg[c] --> akg[e] + tchola[c]	Transport, Extracellular	Cytosol, Extra-organism	Irreversible	SLC22A8	17245646
485	L-threonine/L-alanine reversible exchange	thr-L[e] + ala-L[c] <==> ala-L[e] + thr-L[c]	Transport, Extracellular	Cytosol, Extra-organism	Reversible	SLC7A10	18195088
486	L-threonine/L-alanine exchange (thr-L in)	thr-L[e] + ala-L[c] --> ala-L[e] + thr-L[c]	Transport, Extracellular	Cytosol, Extra-organism	Irreversible	SLC7A8	18195088
487	L-alanine/L-threonine Na-dependent exchange (Thr-L in)	ala-L[c] + na1[e] + thr-L[e] --> ala-L[e] + na1[c] + thr-L[c]	Transport, Extracellular	Cytosol, Extra-organism	Irreversible	SLC1A5	14530974
488	L-threonine/L-asparagine exchange (thr-L in)	thr-L[e] + asn-L[c] --> asn-L[e] + thr-L[c]	Transport, Extracellular	Cytosol, Extra-organism	Irreversible	SLC7A8	18195088
489	L-threonine/B-alanine reversible exchange	thr-L[e] + ala-B[c] <==> ala-B[e] + thr-L[c]	Transport, Extracellular	Cytosol, Extra-organism	Reversible	SLC7A10	18195088
490	L-threonine/L-citrulline exchange (thr-L in)	thr-L[e] + citr-L[c] --> citr-L[e] + thr-L[c]	Transport, Extracellular	Cytosol, Extra-organism	Irreversible	SLC7A8	18195088
491	L-threonine/L-cysteine exchange (thr-L in)	thr-L[e] + cys-L[c] --> cys-L[e] + thr-L[c]	Transport, Extracellular	Cytosol, Extra-organism	Irreversible	SLC7A8	18195088
492	L-cysteine/L-threonine Na-dependent exchange (Thr-L in)	cys-L[c] + na1[e] + thr-L[e] --> cys-L[e] + na1[c] + thr-L[c]	Transport, Extracellular	Cytosol, Extra-organism	Irreversible	SLC1A5	14530974
493	L-threonine/L-glutamine exchange (thr-L in)	thr-L[e] + gln-L[c] --> gln-L[e] + thr-L[c]	Transport, Extracellular	Cytosol, Extra-organism	Irreversible	SLC7A8	18195088
494	L-threonine/glycine exchange (thr-L in)	thr-L[e] + gly[c] --> gly[e] + thr-L[c]	Transport, Extracellular	Cytosol, Extra-organism	Irreversible	SLC7A8	18195088
495	L-threonine/L-homoserine NA-dependent exchange (thr-L in)	thr-L[e] + hom-L[c] + na1[e] --> hom-L[e] + thr-L[c] + na1[c]	Transport, Extracellular	Cytosol, Extra-organism	Irreversible	SLC1A4	8419338
496	L-threonine/L-homoserine NA-dependent exchange (thr-L in)	thr-L[e] + hom-L[c] + na1[e] --> hom-L[e] + thr-L[c] + na1[c]	Transport, Extracellular	Cytosol, Extra-organism	Irreversible	SLC1A5	8419338
497	L-threonine/L-homoserine reversible exchange	thr-L[e] + hom-L[c] <==> hom-L[e] + thr-L[c]	Transport, Extracellular	Cytosol, Extra-organism	Reversible	SLC7A10	18195088
498	L-threonine/L-homoserine exchange (thr-L in)	thr-L[e] + hom-L[c] --> hom-L[e] + thr-L[c]	Transport, Extracellular	Cytosol, Extra-organism	Irreversible	SLC7A8	18195088
499	L-threonine/L-isoleucine exchange (thr-L in)	thr-L[e] + ile-L[c] --> ile-L[e] + thr-L[c]	Transport, Extracellular	Cytosol, Extra-organism	Irreversible	SLC7A8	18195088
500	L-threonine/L-leucine exchange (thr-L in)	thr-L[e] + leu-L[c] --> leu-L[e] + thr-L[c]	Transport, Extracellular	Cytosol, Extra-organism	Irreversible	SLC7A8	18195088
501	L-threonine/L-methionine exchange (thr-L in)	thr-L[e] + met-L[c] --> met-L[e] + thr-L[c]	Transport, Extracellular	Cytosol, Extra-organism	Irreversible	SLC7A8	18195088
502	L-threonine/L-phenylalanine exchange (thr-L in)	thr-L[e] + phe-L[c] --> phe-L[e] + thr-L[c]	Transport, Extracellular	Cytosol, Extra-organism	Irreversible	SLC7A8	18195088
503	L-threonine/L-serine exchange (thr-L in)	thr-L[e] + ser-L[c] --> ser-L[e] + thr-L[c]	Transport, Extracellular	Cytosol, Extra-organism	Irreversible	SLC7A8	18195088
504	L-serine/L-threonine Na-dependent exchange (Thr-L in)	na1[e] + ser-L[c] + thr-L[e] --> na1[c] + ser-L[e] + thr-L[c]	Transport, Extracellular	Cytosol, Extra-organism	Irreversible	SLC1A5	14530974
505	L-threonine transport in via sodium symport	thr-L[e] + na1[e] --> thr-L[c] + na1[c]	Transport, Extracellular	Cytosol, Extra-organism	Irreversible	SLC38A4	18195088
506	L-threonine transport in via sodium symport	thr-L[e] + na1[e] --> thr-L[c] + na1[c]	Transport, Extracellular	Cytosol, Extra-organism	Reversible	SLC6A14	18195088
507	L-threonine transport in via sodium symport	thr-L[e] + na1[e] --> thr-L[c] + na1[c]	Transport, Extracellular	Cytosol, Extra-organism	Irreversible	SLC6A19	18195088
508	L-threonine/L-tryptophan exchange (thr-L in)	thr-L[e] + trp-L[c] --> trp-L[e] + thr-L[c]	Transport, Extracellular	Cytosol, Extra-organism	Irreversible	SLC7A8	18195088
509	L-threonine/L-tyrosine exchange (thr-L in)	thr-L[e] + tyr-L[c] --> tyr-L[e] + thr-L[c]	Transport, Extracellular	Cytosol, Extra-organism	Irreversible	SLC7A8	18195088
510	L-threonine/L-valine exchange (thr-L in)	thr-L[e] + val-L[c] --> val-L[e] + thr-L[c]	Transport, Extracellular	Cytosol, Extra-organism	Irreversible	SLC7A8	18195088
511	T4/3,4-Dihydroxy-L-phenylalanine exchange (thyox-L in)	thyox-L[e] + 34dhphe[c] --> 34dhphe[e] + thyox-L[c]	Transport, Extracellular	Cytosol, Extra-organism	Irreversible	SLC7A5	18195088
512	T4/L-citrulline exchange (thyox-L in)	thyox-L[e] + citr-L[c] --> citr-L[e] + thyox-L[c]	Transport, Extracellular	Cytosol, Extra-organism	Irreversible	SLC7A5	18195088
513	T4/L-histidine exchange (thyox-L in)	thyox-L[e] + his-L[c] --> his-L[e] + thyox-L[c]	Transport, Extracellular	Cytosol, Extra-organism	Irreversible	SLC7A5	18195088
514	T4/L-isoleucine exchange (thyox-L in)	thyox-L[e] + ile-L[c] --> ile-L[e] + thyox-L[c]	Transport, Extracellular	Cytosol, Extra-organism	Irreversible	SLC7A5	18195088
515	T4/L-leucine exchange (thyox-L in)	thyox-L[e] + leu-L[c] --> leu-L[e] + thyox-L[c]	Transport, Extracellular	Cytosol, Extra-organism	Irreversible	SLC7A5	18195088
516	T4/L-methionine exchange (thyox-L in)	thyox-L[e] + met-L[c] --> met-L[e] + thyox-L[c]	Transport, Extracellular	Cytosol, Extra-organism	Irreversible	SLC7A5	18195088
517	T4/L-phenylalanine exchange (thyox-L in)	thyox-L[e] + phe-L[c] --> phe-L[e] + thyox-L[c]	Transport, Extracellular	Cytosol, Extra-organism	Irreversible	SLC7A5	18195088
518	T4/T3 exchange (thyox-L in)	thyox-L[e] + triodthy[c] --> triodthy[e] + thyox-L[c]	Transport, Extracellular	Cytosol, Extra-organism	Irreversible	SLC7A5	18195088
519	T4/L-tryptophan exchange (thyox-L in)	thyox-L[e] + trp-L[c] --> trp-L[e] + thyox-L[c]	Transport, Extracellular	Cytosol, Extra-organism	Irreversible	SLC7A5	18195088
520	T4/L-tyrosine exchange (thyox-L in)	thyox-L[e] + tyr-L[c] --> tyr-L[e] + thyox-L[c]	Transport, Extracellular	Cytosol, Extra-organism	Irreversible	SLC7A5	18195088
521	T4/L-valine exchange (thyox-L in)	thyox-L[e] + val-L[c] --> val-L[e] + thyox-L[c]	Transport, Extracellular	Cytosol, Extra-organism	Irreversible	SLC7A5	18195088
522	T3/3,4-Dihydroxy-L-phenylalanine exchange (triodthy in)	triodthy[e] + 34dhphe[c] --> 34dhphe[e] + triodthy[c]	Transport, Extracellular	Cytosol, Extra-organism	Irreversible	SLC7A5	18195088
523	T3/L-citrulline exchange (triodthy in)	triodthy[e] + citr-L[c] --> citr-L[e] + triodthy[c]	Transport, Extracellular	Cytosol, Extra-organism	Irreversible	SLC7A5	18195088
524	T3/L-histidine exchange (triodthy in)	triodthy[e] + his-L[c] --> his-L[e] + triodthy[c]	Transport, Extracellular	Cytosol, Extra-organism	Irreversible	SLC7A5	18195088
525	T3/L-isoleucine exchange (triodthy in)	triodthy[e] + ile-L[c] --> ile-L[e] + triodthy[c]	Transport, Extracellular	Cytosol, Extra-organism	Irreversible	SLC7A5	18195088
526	T3/L-leucine exchange (triodthy in)	triodthy[e] + leu-L[c] --> leu-L[e] + triodthy[c]	Transport, Extracellular	Cytosol, Extra-organism	Irreversible	SLC7A5	18195088
527	T3/L-methionine exchange (triodthy in)	triodthy[e] + met-L[c] --> met-L[e] + triodthy[c]	Transport, Extracellular	Cytosol, Extra-organism	Irreversible	SLC7A5	18195088
528	T3/L-phenylalanine exchange (triodthy in)	triodthy[e] + phe-L[c] --> phe-L[e] + triodthy[c]	Transport, Extracellular	Cytosol, Extra-organism	Irreversible	SLC7A5	18195088
529	T3/T4 exchange (triodthy in)	triodthy[e] + thyox-L[c] --> thyox-L[e] + triodthy[c]	Transport, Extracellular	Cytosol, Extra-organism	Irreversible	SLC7A5	18195088
530	T3/L-tryptophan exchange (triodthy in)	triodthy[e] + trp-L[c] --> trp-L[e] + triodthy[c]	Transport, Extracellular	Cytosol, Extra-organism	Irreversible	SLC7A5	18195088
531	T3/L-tyrosine exchange (triodthy in)	triodthy[e] + tyr-L[c] --> tyr-L[e] + triodthy[c]	Transport, Extracellular	Cytosol, Extra-organism	Irreversible	SLC7A5	18195088
532	T3/L-valine exchange (triodthy in)	triodthy[e] + val-L[c] --> val-L[e] + triodthy[c]	Transport, Extracellular	Cytosol, Extra-organism	Irreversible	SLC7A5	18195088
533	L-tryptophan/3,4-Dihydroxy-L-phenylalanine exchange (trp-L in)	trp-L[e] + 34dhphe[c] --> 34dhphe[e] + trp-L[c]	Transport, Extracellular	Cytosol, Extra-organism	Irreversible	SLC7A5	18195088
534	L-tryptophan/L-alanine exchange (trp-L in)	trp-L[e] + ala-L[c] --> ala-L[e] + trp-L[c]	Transport, Extracellular	Cytosol, Extra-organism	Irreversible	SLC7A8	18195088
535	L-tryptophan/L-asparagine exchange (trp-L in)	trp-L[e] + asn-L[c] --> asn-L[e] + trp-L[c]	Transport, Extracellular	Cytosol, Extra-organism	Irreversible	SLC7A8	18195088
536	L-tryptophan/L-citrulline exchange (trp-L in)	trp-L[e] + citr-L[c] --> citr-L[e] + trp-L[c]	Transport, Extracellular	Cytosol, Extra-organism	Irreversible	SLC7A5	18195088
537	L-tryptophan/L-citrulline exchange (trp-L in)	trp-L[e] + citr-L[c] --> citr-L[e] + trp-L[c]	Transport, Extracellular	Cytosol, Extra-organism	Irreversible	SLC7A8	18195088
538	L-tryptophan/L-cysteine exchange (trp-L in)	trp-L[e] + cys-L[c] --> cys-L[e] + trp-L[c]	Transport, Extracellular	Cytosol, Extra-organism	Irreversible	SLC7A8	18195088
539	L-tryptophan/L-glutamine exchange (trp-L in)	trp-L[e] + gln-L[c] --> gln-L[e] + trp-L[c]	Transport, Extracellular	Cytosol, Extra-organism	Irreversible	SLC7A8	18195088
540	L-tryptophan/glycine exchange (trp-L in)	trp-L[e] + gly[c] --> gly[e] + trp-L[c]	Transport, Extracellular	Cytosol, Extra-organism	Irreversible	SLC7A8	18195088
541	L-tryptophan/L-histidine exchange (trp-L in)	trp-L[e] + his-L[c] --> his-L[e] + trp-L[c]	Transport, Extracellular	Cytosol, Extra-organism	Irreversible	SLC7A5	18195088
542	L-tryptophan/L-homoserine exchange (trp-L in)	trp-L[e] + hom-L[c] --> hom-L[e] + trp-L[c]	Transport, Extracellular	Cytosol, Extra-organism	Irreversible	SLC7A8	18195088
543	L-tryptophan/L-isoleucine exchange (trp-L in)	trp-L[e] + ile-L[c] --> ile-L[e] + trp-L[c]	Transport, Extracellular	Cytosol, Extra-organism	Irreversible	SLC7A5	18195088
544	L-tryptophan/L-isoleucine exchange (trp-L in)	trp-L[e] + ile-L[c] --> ile-L[e] + trp-L[c]	Transport, Extracellular	Cytosol, Extra-organism	Irreversible	SLC7A8	18195088
545	L-tryptophan/L-leucine exchange (trp-L in)	trp-L[e] + leu-L[c] --> leu-L[e] + trp-L[c]	Transport, Extracellular	Cytosol, Extra-organism	Irreversible	SLC7A5	18195088
546	L-tryptophan/L-leucine exchange (trp-L in)	trp-L[e] + leu-L[c] --> leu-L[e] + trp-L[c]	Transport, Extracellular	Cytosol, Extra-organism	Irreversible	SLC7A8	18195088
547	L-tryptophan/L-methionine exchange (trp-L in)	trp-L[e] + met-L[c] --> met-L[e] + trp-L[c]	Transport, Extracellular	Cytosol, Extra-organism	Irreversible	SLC7A5	18195088
548	L-tryptophan/L-methionine exchange (trp-L in)	trp-L[e] + met-L[c] --> met-L[e] + trp-L[c]	Transport, Extracellular	Cytosol, Extra-organism	Irreversible	SLC7A8	18195088
549	L-tryptophan/L-phenylalanine exchange (trp-L in)	trp-L[e] + phe-L[c] --> phe-L[e] + trp-L[c]	Transport, Extracellular	Cytosol, Extra-organism	Irreversible	SLC7A5	18195088
550	L-tryptophan/L-phenylalanine exchange (trp-L in)	trp-L[e] + phe-L[c] --> phe-L[e] + trp-L[c]	Transport, Extracellular	Cytosol, Extra-organism	Irreversible	SLC7A8	18195088
551	L-tryptophan/L-serine exchange (trp-L in)	trp-L[e] + ser-L[c] --> ser-L[e] + trp-L[c]	Transport, Extracellular	Cytosol, Extra-organism	Irreversible	SLC7A8	18195088
552	L-tryptophan transport in via sodium symport	trp-L[e] + na1[e] --> trp-L[c] + na1[c]	Transport, Extracellular	Cytosol, Extra-organism	Irreversible	SLC6A19	18195088
553	L-tryptophan/L-threonine exchange (trp-L in)	trp-L[e] + thr-L[c] --> thr-L[e] + trp-L[c]	Transport, Extracellular	Cytosol, Extra-organism	Irreversible	SLC7A8	18195088
554	L-tryptophan/T4 exchange (trp-L in)	trp-L[e] + thyox-L[c] --> thyox-L[e] + trp-L[c]	Transport, Extracellular	Cytosol, Extra-organism	Irreversible	SLC7A5	18195088
555	L-tryptophan/T3 exchange (trp-L in)	trp-L[e] + triodthy[c] --> triodthy[e] + trp-L[c]	Transport, Extracellular	Cytosol, Extra-organism	Irreversible	SLC7A5	18195088
556	L-tryptophan/L-tyrosine exchange (trp-L in)	trp-L[e] + tyr-L[c] --> tyr-L[e] + trp-L[c]	Transport, Extracellular	Cytosol, Extra-organism	Irreversible	SLC7A5	18195088
557	L-tryptophan/L-tyrosine exchange (trp-L in)	trp-L[e] + tyr-L[c] --> tyr-L[e] + trp-L[c]	Transport, Extracellular	Cytosol, Extra-organism	Irreversible	SLC7A8	18195088
558	L-tryptophan/L-valine exchange (trp-L in)	trp-L[e] + val-L[c] --> val-L[e] + trp-L[c]	Transport, Extracellular	Cytosol, Extra-organism	Irreversible	SLC7A5	18195088
559	L-tryptophan/L-valine exchange (trp-L in)	trp-L[e] + val-L[c] --> val-L[e] + trp-L[c]	Transport, Extracellular	Cytosol, Extra-organism	Irreversible	SLC7A8	18195088
560	L-tyrosine/3,4-Dihydroxy-L-phenylalanine exchange (tyr-L in)	tyr-L[e] + 34dhphe[c] --> 34dhphe[e] + tyr-L[c]	Transport, Extracellular	Cytosol, Extra-organism	Irreversible	SLC7A5	18195088
561	L-tyrosine/L-alanine exchange (tyr-L in)	tyr-L[e] + ala-L[c] --> ala-L[e] + tyr-L[c]	Transport, Extracellular	Cytosol, Extra-organism	Irreversible	SLC7A8	18195088
562	L-tyrosine/L-asparagine exchange (tyr-L in)	tyr-L[e] + asn-L[c] --> asn-L[e] + tyr-L[c]	Transport, Extracellular	Cytosol, Extra-organism	Irreversible	SLC7A8	18195088
563	L-tyrosine/L-citrulline exchange (tyr-L in)	tyr-L[e] + citr-L[c] --> citr-L[e] + tyr-L[c]	Transport, Extracellular	Cytosol, Extra-organism	Irreversible	SLC7A5	18195088
564	L-tyrosine/L-citrulline exchange (tyr-L in)	tyr-L[e] + citr-L[c] --> citr-L[e] + tyr-L[c]	Transport, Extracellular	Cytosol, Extra-organism	Irreversible	SLC7A8	18195088
565	L-tyrosine/L-cysteine exchange (tyr-L in)	tyr-L[e] + cys-L[c] --> cys-L[e] + tyr-L[c]	Transport, Extracellular	Cytosol, Extra-organism	Irreversible	SLC7A8	18195088
566	L-tyrosine/L-glutamine exchange (tyr-L in)	tyr-L[e] + gln-L[c] --> gln-L[e] + tyr-L[c]	Transport, Extracellular	Cytosol, Extra-organism	Irreversible	SLC7A8	18195088
567	L-tyrosine/glycine exchange (tyr-L in)	tyr-L[e] + gly[c] --> gly[e] + tyr-L[c]	Transport, Extracellular	Cytosol, Extra-organism	Irreversible	SLC7A8	18195088
568	L-tyrosine/L-histidine exchange (tyr-L in)	tyr-L[e] + his-L[c] --> his-L[e] + tyr-L[c]	Transport, Extracellular	Cytosol, Extra-organism	Irreversible	SLC7A5	18195088
569	L-tyrosine/L-homoserine exchange (tyr-L in)	tyr-L[e] + hom-L[c] --> hom-L[e] + tyr-L[c]	Transport, Extracellular	Cytosol, Extra-organism	Irreversible	SLC7A8	18195088
570	L-tyrosine/L-isoleucine exchange (tyr-L in)	tyr-L[e] + ile-L[c] --> ile-L[e] + tyr-L[c]	Transport, Extracellular	Cytosol, Extra-organism	Irreversible	SLC7A5	18195088
571	L-tyrosine/L-isoleucine exchange (tyr-L in)	tyr-L[e] + ile-L[c] --> ile-L[e] + tyr-L[c]	Transport, Extracellular	Cytosol, Extra-organism	Irreversible	SLC7A8	18195088
572	L-tyrosine/L-leucine exchange (tyr-L in)	tyr-L[e] + leu-L[c] --> leu-L[e] + tyr-L[c]	Transport, Extracellular	Cytosol, Extra-organism	Irreversible	SLC7A5	18195088
573	L-tyrosine/L-leucine exchange (tyr-L in)	tyr-L[e] + leu-L[c] --> leu-L[e] + tyr-L[c]	Transport, Extracellular	Cytosol, Extra-organism	Irreversible	SLC7A8	18195088
574	L-tyrosine/L-methionine exchange (tyr-L in)	tyr-L[e] + met-L[c] --> met-L[e] + tyr-L[c]	Transport, Extracellular	Cytosol, Extra-organism	Irreversible	SLC7A5	18195088
575	L-tyrosine/L-methionine exchange (tyr-L in)	tyr-L[e] + met-L[c] --> met-L[e] + tyr-L[c]	Transport, Extracellular	Cytosol, Extra-organism	Irreversible	SLC7A8	18195088
576	L-tyrosine/L-phenylalanine exchange (tyr-L in)	tyr-L[e] + phe-L[c] --> phe-L[e] + tyr-L[c]	Transport, Extracellular	Cytosol, Extra-organism	Irreversible	SLC7A5	18195088
577	L-tyrosine/L-phenylalanine exchange (tyr-L in)	tyr-L[e] + phe-L[c] --> phe-L[e] + tyr-L[c]	Transport, Extracellular	Cytosol, Extra-organism	Irreversible	SLC7A8	18195088
578	L-tyrosine/L-serine exchange (tyr-L in)	tyr-L[e] + ser-L[c] --> ser-L[e] + tyr-L[c]	Transport, Extracellular	Cytosol, Extra-organism	Irreversible	SLC7A8	18195088
579	L-tyrosine transport in via sodium symport	tyr-L[e] + na1[e] --> tyr-L[c] + na1[c]	Transport, Extracellular	Cytosol, Extra-organism	Irreversible	SLC6A19	18195088
580	L-tyrosine/L-threonine exchange (tyr-L in)	tyr-L[e] + thr-L[c] --> thr-L[e] + tyr-L[c]	Transport, Extracellular	Cytosol, Extra-organism	Irreversible	SLC7A8	18195088
581	L-tyrosine/T4 exchange (tyr-L in)	tyr-L[e] + thyox-L[c] --> thyox-L[e] + tyr-L[c]	Transport, Extracellular	Cytosol, Extra-organism	Irreversible	SLC7A5	18195088
582	L-tyrosine/T3 exchange (tyr-L in)	tyr-L[e] + triodthy[c] --> triodthy[e] + tyr-L[c]	Transport, Extracellular	Cytosol, Extra-organism	Irreversible	SLC7A5	18195088
583	L-tyrosine/L-tryptophan exchange (tyr-L in)	tyr-L[e] + trp-L[c] --> trp-L[e] + tyr-L[c]	Transport, Extracellular	Cytosol, Extra-organism	Irreversible	SLC7A5	18195088
584	L-tyrosine/L-tryptophan exchange (tyr-L in)	tyr-L[e] + trp-L[c] --> trp-L[e] + tyr-L[c]	Transport, Extracellular	Cytosol, Extra-organism	Irreversible	SLC7A8	18195088
585	L-tyrosine/L-valine exchange (tyr-L in)	tyr-L[e] + val-L[c] --> val-L[e] + tyr-L[c]	Transport, Extracellular	Cytosol, Extra-organism	Irreversible	SLC7A5	18195088
586	L-tyrosine/L-valine exchange (tyr-L in)	tyr-L[e] + val-L[c] --> val-L[e] + tyr-L[c]	Transport, Extracellular	Cytosol, Extra-organism	Irreversible	SLC7A8	18195088
587	urate/alpha-ketoglutarate exchange (urate in)	urate[e] + akg[c] --> akg[e] + urate[c]	Transport, Extracellular	Cytosol, Extra-organism	Irreversible	SLC22A6	17245646
588	L-valine/3,4-Dihydroxy-L-phenylalanine exchange (val-L in)	val-L[e] + 34dhphe[c] --> 34dhphe[e] + val-L[c]	Transport, Extracellular	Cytosol, Extra-organism	Irreversible	SLC7A5	18195088
589	L-valine/L-alanine exchange (val-L in)	val-L[e] + ala-L[c] --> ala-L[e] + val-L[c]	Transport, Extracellular	Cytosol, Extra-organism	Irreversible	SLC7A8	18195088
590	L-valine/L-asparagine exchange (val-L in)	val-L[e] + asn-L[c] --> asn-L[e] + val-L[c]	Transport, Extracellular	Cytosol, Extra-organism	Irreversible	SLC7A8	18195088
591	L-valine/L-citrulline exchange (val-L in)	val-L[e] + citr-L[c] --> citr-L[e] + val-L[c]	Transport, Extracellular	Cytosol, Extra-organism	Irreversible	SLC7A5	18195088
592	L-valine/L-citrulline exchange (val-L in)	val-L[e] + citr-L[c] --> citr-L[e] + val-L[c]	Transport, Extracellular	Cytosol, Extra-organism	Irreversible	SLC7A8	18195088
593	L-valine/L-cysteine exchange (val-L in)	val-L[e] + cys-L[c] --> cys-L[e] + val-L[c]	Transport, Extracellular	Cytosol, Extra-organism	Irreversible	SLC7A8	18195088
594	L-valine/L-glutamine exchange (val-L in)	val-L[e] + gln-L[c] --> gln-L[e] + val-L[c]	Transport, Extracellular	Cytosol, Extra-organism	Irreversible	SLC7A8	18195088
595	L-valine/glycine exchange (val-L in)	val-L[e] + gly[c] --> gly[e] + val-L[c]	Transport, Extracellular	Cytosol, Extra-organism	Irreversible	SLC7A8	18195088
596	L-valine/L-histidine exchange (val-L in)	val-L[e] + his-L[c] --> his-L[e] + val-L[c]	Transport, Extracellular	Cytosol, Extra-organism	Irreversible	SLC7A5	18195088
597	L-valine/L-homoserine exchange (val-L in)	val-L[e] + hom-L[c] --> hom-L[e] + val-L[c]	Transport, Extracellular	Cytosol, Extra-organism	Irreversible	SLC7A8	18195088
598	L-valine/L-isoleucine exchange (val-L in)	val-L[e] + ile-L[c] --> ile-L[e] + val-L[c]	Transport, Extracellular	Cytosol, Extra-organism	Irreversible	SLC7A5	18195088
599	L-valine/L-isoleucine exchange (val-L in)	val-L[e] + ile-L[c] --> ile-L[e] + val-L[c]	Transport, Extracellular	Cytosol, Extra-organism	Irreversible	SLC7A8	18195088
600	L-valine/L-leucine exchange (val-L in)	val-L[e] + leu-L[c] --> leu-L[e] + val-L[c]	Transport, Extracellular	Cytosol, Extra-organism	Irreversible	SLC7A5	18195088
601	L-valine/L-leucine exchange (val-L in)	val-L[e] + leu-L[c] --> leu-L[e] + val-L[c]	Transport, Extracellular	Cytosol, Extra-organism	Irreversible	SLC7A8	18195088
602	L-valine/L-methionine exchange (val-L in)	val-L[e] + met-L[c] --> met-L[e] + val-L[c]	Transport, Extracellular	Cytosol, Extra-organism	Irreversible	SLC7A5	18195088
603	L-valine/L-methionine exchange (val-L in)	val-L[e] + met-L[c] --> met-L[e] + val-L[c]	Transport, Extracellular	Cytosol, Extra-organism	Irreversible	SLC7A8	18195088
604	L-valine/L-phenylalanine exchange (val-L in)	val-L[e] + phe-L[c] --> phe-L[e] + val-L[c]	Transport, Extracellular	Cytosol, Extra-organism	Irreversible	SLC7A5	18195088
605	L-valine/L-phenylalanine exchange (val-L in)	val-L[e] + phe-L[c] --> phe-L[e] + val-L[c]	Transport, Extracellular	Cytosol, Extra-organism	Irreversible	SLC7A8	18195088
606	L-valine/L-serine exchange (val-L in)	val-L[e] + ser-L[c] --> ser-L[e] + val-L[c]	Transport, Extracellular	Cytosol, Extra-organism	Irreversible	SLC7A8	18195088
607	L-valine transport in via sodium symport	val-L[e] + na1[e] --> val-L[c] + na1[c]	Transport, Extracellular	Cytosol, Extra-organism	Irreversible	SLC6A19	18195088
608	L-valine/L-threonine exchange (val-L in)	val-L[e] + thr-L[c] --> thr-L[e] + val-L[c]	Transport, Extracellular	Cytosol, Extra-organism	Irreversible	SLC7A8	18195088
609	L-valine/T4 exchange (val-L in)	val-L[e] + thyox-L[c] --> thyox-L[e] + val-L[c]	Transport, Extracellular	Cytosol, Extra-organism	Irreversible	SLC7A5	18195088
610	L-valine/T3 exchange (val-L in)	val-L[e] + triodthy[c] --> triodthy[e] + val-L[c]	Transport, Extracellular	Cytosol, Extra-organism	Irreversible	SLC7A5	18195088
611	L-valine/L-tryptophan exchange (val-L in)	val-L[e] + trp-L[c] --> trp-L[e] + val-L[c]	Transport, Extracellular	Cytosol, Extra-organism	Irreversible	SLC7A5	18195088
612	L-valine/L-tryptophan exchange (val-L in)	val-L[e] + trp-L[c] --> trp-L[e] + val-L[c]	Transport, Extracellular	Cytosol, Extra-organism	Irreversible	SLC7A8	18195088
613	L-valine/L-tyrosine exchange (val-L in)	val-L[e] + tyr-L[c] --> tyr-L[e] + val-L[c]	Transport, Extracellular	Cytosol, Extra-organism	Irreversible	SLC7A5	18195088
614	L-valine/L-tyrosine exchange (val-L in)	val-L[e] + tyr-L[c] --> tyr-L[e] + val-L[c]	Transport, Extracellular	Cytosol, Extra-organism	Irreversible	SLC7A8	18195088
615	taurochenodoexycholate transport via sodium cotransport	(2) na1[e] + tdchola[e] --> (2) na1[c] + tdchola[c]	Transport, Extracellular	Cytosol, Extra-organism	Irreversible	SLC10A1	12851823
616	glycochenodeoxycholate transport via sodium cotransport	gdchola[e] + (2) na1[e] --> gdchola[c] + (2) na1[c]	Transport, Extracellular	Cytosol, Extra-organism	Irreversible	SLC10A1	12851823
617	taurocholate transport via sodium cotransport	(2) na1[e] + tchola[e] --> (2) na1[c] + tchola[c]	Transport, Extracellular	Cytosol, Extra-organism	Irreversible	SLC10A2	12851823
618	taurochenodoexycholate transport via sodium cotransport	(2) na1[e] + tdchola[e] --> (2) na1[c] + tdchola[c]	Transport, Extracellular	Cytosol, Extra-organism	Irreversible	SLC10A2	12851823
619	glycocholate transport via sodium cotransport	gchola[e] + (2) na1[e] --> gchola[c] + (2) na1[c]	Transport, Extracellular	Cytosol, Extra-organism	Irreversible	SLC10A2	12851823
620	glycochenodeoxycholate transport via sodium cotransport	gdchola[e] + (2) na1[e] --> gdchola[c] + (2) na1[c]	Transport, Extracellular	Cytosol, Extra-organism	Irreversible	SLC10A2	12851823
621	dehydroepiandrosterone sulfate transport via sodium cotransport	dheas[e] + (2) na1[e] --> dheas[c] + (2) na1[c]	Transport, Extracellular	Cytosol, Extra-organism	Irreversible	SLC10A6	16541252
622	citrate transport via sodium symport	cit[e] + (3) na1[e] <==> cit[c] + (3) na1[c]	Transport, Extracellular	Cytosol, Extra-organism	Reversible	SLC13A3	12915942
623	pyruvate transport via sodium symport	pyr[e] + (4) na1[e] <==> pyr[c] + (4) na1[c]	Transport, Extracellular	Cytosol, Extra-organism	Reversible	SLC13A5	12915942
624	succinate transport via sodium symport	succ[e] + (4) na1[e] <==> succ[c] + (4) na1[c]	Transport, Extracellular	Cytosol, Extra-organism	Reversible	SLC13A5	12915942
625	carnosine reversible transport via proton symport	h[e] + carn[e] <==> h[c] + carn[c]	Transport, Extracellular	Cytosol, Extra-organism	Reversible	SLC15A1	12905028
626	carnosine reversible transport via proton symport	h[e] + carn[e] <==> h[c] + carn[c]	Transport, Extracellular	Cytosol, Extra-organism	Reversible	SLC15A2	12905028
627	carnosine reversible transport via proton symport	h[e] + carn[e] <==> h[c] + carn[c]	Transport, Extracellular	Cytosol, Extra-organism	Reversible	SLC15A3	12905028
628	L-histidine reversible transport via proton symport	h[e] + his-L[e] <==> h[c] + his-L[c]	Transport, Extracellular	Cytosol, Extra-organism	Reversible	SLC15A3	12905028
629	carnosine reversible transport via proton symport	h[e] + carn[e] <==> h[c] + carn[c]	Transport, Extracellular	Cytosol, Extra-organism	Reversible	SLC15A4	12905028
630	L-histidine reversible transport via proton symport	h[e] + his-L[e] <==> h[c] + his-L[c]	Transport, Extracellular	Cytosol, Extra-organism	Reversible	SLC15A4	12905028
631	2-hydroxybutyrate cotransport with proton	2hb[e] + h[e] <==> 2hb[c] + h[c]	Transport, Extracellular	Cytosol, Extra-organism	Reversible	SLC16A3	12739169
632	acetoacetate transport via proton symport	acac[e] + h[e] <==> acac[c] + h[c]	Transport, Extracellular	Cytosol, Extra-organism	Reversible	SLC16A3	12739169
633	acetone transport via proton symport	acetone[e] + h[e] <==> acetone[c] + h[c]	Transport, Extracellular	Cytosol, Extra-organism	Reversible	SLC16A3	12739169
634	D-lactate transport via proton symport	h[e] + lac-D[e] <==> h[c] + lac-D[c]	Transport, Extracellular	Cytosol, Extra-organism	Reversible	SLC16A3	12739169
635	L-lactate reversible transport via proton symport	h[e] + lac-L[e] <==> h[c] + lac-L[c]	Transport, Extracellular	Cytosol, Extra-organism	Reversible	SLC16A3	12739169
636	pyruvate reversible transport via proton symport	h[e] + pyr[e] <==> h[c] + pyr[c]	Transport, Extracellular	Cytosol, Extra-organism	Reversible	SLC16A3	12739169
637	2-hydroxybutyrate cotransport with proton	2hb[e] + h[e] <==> 2hb[c] + h[c]	Transport, Extracellular	Cytosol, Extra-organism	Reversible	SLC16A7	12739169
638	acetoacetate transport via proton symport	acac[e] + h[e] <==> acac[c] + h[c]	Transport, Extracellular	Cytosol, Extra-organism	Reversible	SLC16A7	12739169
639	acetone transport via proton symport	acetone[e] + h[e] <==> acetone[c] + h[c]	Transport, Extracellular	Cytosol, Extra-organism	Reversible	SLC16A7	12739169
640	D-lactate transport via proton symport	h[e] + lac-D[e] <==> h[c] + lac-D[c]	Transport, Extracellular	Cytosol, Extra-organism	Reversible	SLC16A7	12739169
641	L-lactate reversible transport via proton symport	h[e] + lac-L[e] <==> h[c] + lac-L[c]	Transport, Extracellular	Cytosol, Extra-organism	Reversible	SLC16A7	12739169
642	pyruvate reversible transport via proton symport	h[e] + pyr[e] <==> h[c] + pyr[c]	Transport, Extracellular	Cytosol, Extra-organism	Reversible	SLC16A7	12739169
643	L-lactate reversible transport via proton symport	h[e] + lac-L[e] <==> h[c] + lac-L[c]	Transport, Extracellular	Cytosol, Extra-organism	Reversible	SLC16A8	12739169
644	Thiamine diphosphate in	oh1[c] + thmpp[e] <==> oh1[e] + thmpp[c]	Transport, Extracellular	Cytosol, Extra-organism	Irreversible	SLC19A1	14770311
645	Acetylcholine uniport	ach[e] <==> ach[c]	Transport, Extracellular	Cytosol, Extra-organism	Reversible	SLC22A1	17473959
646	dehydroepiandrosterone sulfate/glutarate exchange (dheas in)	dheas[e] + glutarate[c] --> glutarate[e] + dheas[c]	Transport, Extracellular	Cytosol, Extra-organism	Irreversible	SLC22A11	17245646
647	estrone-3-sulfate/glutarate exchange (estrones in)	estrones[e] + glutarate[c] --> glutarate[e] + estrones[c]	Transport, Extracellular	Cytosol, Extra-organism	Irreversible	SLC22A11	17245646
648	urate in	urate[e] --> urate[c]	Transport, Extracellular	Cytosol, Extra-organism	Irreversible	SLC22A12	17245646
649	Acetylcholine uniport	ach[e] <==> ach[c]	Transport, Extracellular	Cytosol, Extra-organism	Reversible	SLC22A2	17473959
650	Epinephrine uniport	adrnl[e] <==> adrnl[c]	Transport, Extracellular	Cytosol, Extra-organism	Reversible	SLC22A2	17473959
651	Creatinine uniport	crtn[e] <==> crtn[c]	Transport, Extracellular	Cytosol, Extra-organism	Reversible	SLC22A2	17473959
652	Epinephrine uniport	adrnl[e] <==> adrnl[c]	Transport, Extracellular	Cytosol, Extra-organism	Reversible	SLC22A3	17473959
653	Histamine uniport	hista[e] <==> hista[c]	Transport, Extracellular	Cytosol, Extra-organism	Reversible	SLC22A3	17473959
654	Norepinephrine uniport	nrpphr[e] <==> nrpphr[c]	Transport, Extracellular	Cytosol, Extra-organism	Reversible	SLC22A3	17473959
655	Choline inward transport by Na+ symport	chol[e] + na1[e] --> chol[c] + na1[c]	Transport, Extracellular	Cytosol, Extra-organism	Irreversible	SLC22A5	10966938
656	Betaine inward transport by Na+ symport	glyb[e] + na1[e] --> glyb[c] + na1[c]	Transport, Extracellular	Cytosol, Extra-organism	Irreversible	SLC22A5	10966938
657	L-lysine inward transport by Na+ symport	lys-L[e] + na1[e] --> lys-L[c] + na1[c]	Transport, Extracellular	Cytosol, Extra-organism	Irreversible	SLC22A5	18599538
658	L-methionine inward transport by Na+ symport	met-L[e] + na1[e] --> met-L[c] + na1[c]	Transport, Extracellular	Cytosol, Extra-organism	Irreversible	SLC22A5	18195088
659	cyclic AMP in	camp[e] --> camp[c]	Transport, Extracellular	Cytosol, Extra-organism	Irreversible	SLC22A7	17245646
660	dehydroepiandrosterone sulfate in	dheas[e] --> dheas[c]	Transport, Extracellular	Cytosol, Extra-organism	Irreversible	SLC22A7	17245646
661	estrone-3-sulfate in	estrones[e] --> estrones[c]	Transport, Extracellular	Cytosol, Extra-organism	Irreversible	SLC22A7	17245646
662	prostaglandin E2 in	prostge2[e] --> prostge2[c]	Transport, Extracellular	Cytosol, Extra-organism	Irreversible	SLC22A7	17245646
663	prostaglandin F2a in	prostgf2[e] --> prostgf2[c]	Transport, Extracellular	Cytosol, Extra-organism	Irreversible	SLC22A7	17245646
664	cyclic AMP/alpha-ketoglutarate exchange (camp in)	camp[e] + akg[c] --> akg[e] + camp[c]	Transport, Extracellular	Cytosol, Extra-organism	Irreversible	SLC22A8	17245646
665	prostaglandin E2/alpha-ketoglutarate exchange (prostge2 in)	prostge2[e] + akg[c] --> akg[e] + prostge2[c]	Transport, Extracellular	Cytosol, Extra-organism	Irreversible	SLC22A8	17245646
666	prostglandin F2a/alpha-ketoglutarate exchange (prostgf2 in)	prostgf2[e] + akg[c] --> akg[e] + prostgf2[c]	Transport, Extracellular	Cytosol, Extra-organism	Irreversible	SLC22A8	17245646
667	L-ascorbate transport via sodium symport	ascb-L[e] + na1[e] <==> ascb-L[c] + na1[c]	Transport, Extracellular	Cytosol, Extra-organism	Reversible	SLC23A2	12845532
668	xanthosine transport in via sodium symport	xtsn[e] + na1[e] --> xtsn[c] + na1[c]	Transport, Extracellular	Cytosol, Extra-organism	Irreversible	SLC28A2	12856181
669	xanthosine transport in via sodium (1:2) symport	xtsn[e] + (2) na1[e] --> xtsn[c] + (2) na1[c]	Transport, Extracellular	Cytosol, Extra-organism	Irreversible	SLC28A3	12856181
670	xanthosine facilated transport in cytosol	xtsn[e] <==> xtsn[c]	Transport, Extracellular	Cytosol, Extra-organism	Reversible	SLC29A1	12838422
671	adenosine facilated transport in cytosol	adn[e] <==> adn[c]	Transport, Extracellular	Cytosol, Extra-organism	Reversible	SLC29A2	12838422
672	cytidine facilated transport in cytosol	cytd[e] <==> cytd[c]	Transport, Extracellular	Cytosol, Extra-organism	Reversible	SLC29A2	12838422
673	guanosine facilated transport in cytosol	gsn[e] <==> gsn[c]	Transport, Extracellular	Cytosol, Extra-organism	Reversible	SLC29A2	12838422
674	Inosine transport (diffusion)	ins[e] <==> ins[c]	Transport, Extracellular	Cytosol, Extra-organism	Reversible	SLC29A2	12838422
675	uridine facilated transport in cytosol	uri[e] <==> uri[c]	Transport, Extracellular	Cytosol, Extra-organism	Reversible	SLC29A2	12838422
676	Xanthine transport	xan[e] <==> xan[c]	Transport, Extracellular	Cytosol, Extra-organism	Reversible	SLC29A2	12838422
677	D-glucose transport (uniport)	glc-D[e] <==> glc-D[c]	Transport, Extracellular	Cytosol, Extra-organism	Reversible	SLC2A1	12750891
678	galactose transport (uniport)	gal[e] <==> gal[c]	Transport, Extracellular	Cytosol, Extra-organism	Reversible	SLC2A2	12750891
679	glucosamine transport (uniport)	gam[e] <==> gam[c]	Transport, Extracellular	Cytosol, Extra-organism	Reversible	SLC2A2	12750891
680	D-glucose transport (uniport)	glc-D[e] <==> glc-D[c]	Transport, Extracellular	Cytosol, Extra-organism	Reversible	SLC2A2	12750891
681	mannose transport (uniport)	man[e] <==> man[c]	Transport, Extracellular	Cytosol, Extra-organism	Reversible	SLC2A2	12750891
682	galactose transport (uniport)	gal[e] <==> gal[c]	Transport, Extracellular	Cytosol, Extra-organism	Reversible	SLC2A3	12750891
683	D-glucose transport (uniport)	glc-D[e] <==> glc-D[c]	Transport, Extracellular	Cytosol, Extra-organism	Reversible	SLC2A3	12750891
684	mannose transport (uniport)	man[e] <==> man[c]	Transport, Extracellular	Cytosol, Extra-organism	Reversible	SLC2A3	12750891
685	glucosamine transport (uniport)	gam[e] <==> gam[c]	Transport, Extracellular	Cytosol, Extra-organism	Reversible	SLC2A4	12750891
686	D-glucose transport (uniport)	glc-D[e] <==> glc-D[c]	Transport, Extracellular	Cytosol, Extra-organism	Reversible	SLC2A4	12750891
687	glycerol-3-phosphate/phosphate antiporter	glyc3p[c] + pi[e] <==> glyc3p[e] + pi[c]	Transport, Extracellular	Cytosol, Extra-organism	Reversible	SLC37A1	12811562
688	D-glucose 6-phosphate/phosphate antiporter	g6p[c] + pi[e] <==> g6p[e] + pi[c]	Transport, Extracellular	Cytosol, Extra-organism	Reversible	SLC37A4	12811562
689	L-homoserine transport in via sodium symport	hom-L[e] + na1[e] --> hom-L[c] + na1[c]	Transport, Extracellular	Cytosol, Extra-organism	Irreversible	SLC38A1	18195088
690	L-homoserine transport in via sodium symport	hom-L[e] + na1[e] --> hom-L[c] + na1[c]	Transport, Extracellular	Cytosol, Extra-organism	Irreversible	SLC38A4	18195088
691	L-isoleucine transport via diffusion (extracellular to cytosol)	ile-L[e] <==> ile-L[c]	Transport, Extracellular	Cytosol, Extra-organism	Reversible	SLC43A2	18195088
692	L-leucine transport via diffusion (extracellular to cytosol)	leu-L[e] <==> leu-L[c]	Transport, Extracellular	Cytosol, Extra-organism	Reversible	SLC43A2	18195088
693	L-methionine transport via diffusion (extracellular to cytosol)	met-L[e] <==> met-L[c]	Transport, Extracellular	Cytosol, Extra-organism	Reversible	SLC43A2	18195088
694	L-phenylalanine transport via diffusion (extracellular to cytosol)	phe-L[e] <==> phe-L[c]	Transport, Extracellular	Cytosol, Extra-organism	Reversible	SLC43A2	18195088
695	L-valine transport via diffusion (extracellular to cytosol)	val-L[e] <==> val-L[c]	Transport, Extracellular	Cytosol, Extra-organism	Reversible	SLC43A2	18195088
696	inositol transport via sodium symport	inost[e] + (2) na1[e] <==> inost[c] + (2) na1[c]	Transport, Extracellular	Cytosol, Extra-organism	Reversible	SLC5A3	12748858
697	4-aminobutyrate reversible transport in via sodium symport (1:2)	4abut[e] + (2) na1[e] <==> 4abut[c] + (2) na1[c]	Transport, Extracellular	Cytosol, Extra-organism	Reversible	SLC6A11	12719981
698	4-aminobutyrate reversible transport in via sodium symport (1:2)	4abut[e] + (2) na1[e] <==> 4abut[c] + (2) na1[c]	Transport, Extracellular	Cytosol, Extra-organism	Reversible	SLC6A12	12719981
699	beta-alanine transport (sodium symport) (2:1)	ala-B[e] + (2) na1[e] <==> ala-B[c] + (2) na1[c]	Transport, Extracellular	Cytosol, Extra-organism	Reversible	SLC6A12	10358010
700	N,N-dimethylglycine reversible transport in via sodium symport (1:2)	dmgly[e] + (2) na1[e] <==> dmgly[c] + (2) na1[c]	Transport, Extracellular	Cytosol, Extra-organism	Reversible	SLC6A12	10358010
701	glycine transport (sodium symport) (2:1)	gly[e] + (2) na1[e] <==> gly[c] + (2) na1[c]	Transport, Extracellular	Cytosol, Extra-organism	Reversible	SLC6A12	10358010
702	4-aminobutyrate reversible transport in via sodium symport (1:2)	4abut[e] + (2) na1[e] <==> 4abut[c] + (2) na1[c]	Transport, Extracellular	Cytosol, Extra-organism	Reversible	SLC6A13	12719981
703	L-homoserine transport in via sodium symport	hom-L[e] + na1[e] --> hom-L[c] + na1[c]	Transport, Extracellular	Cytosol, Extra-organism	Reversible	SLC6A14	18195088
704	L-isoleucine transport in via sodium symport	ile-L[e] + na1[e] --> ile-L[c] + na1[c]	Transport, Extracellular	Cytosol, Extra-organism	Irreversible	SLC6A15	18599538
705	L-valine transport in via sodium symport	na1[e] + val-L[e] --> na1[c] + val-L[c]	Transport, Extracellular	Cytosol, Extra-organism	Irreversible	SLC6A15	18599538
706	glycine transport in	gly[e] --> gly[e]	Transport, Extracellular	Cytosol, Extra-organism	Irreversible	SLC6A18	18195088
707	L-homoserine transport in via sodium symport	hom-L[e] + na1[e] --> hom-L[c] + na1[c]	Transport, Extracellular	Cytosol, Extra-organism	Irreversible	SLC6A19	18195088
708	Dopamine reversible transport in via sodium symport (1:2)	dopa[e] + (2) na1[e] <==> dopa[c] + (2) na1[c]	Transport, Extracellular	Cytosol, Extra-organism	Reversible	SLC6A2	12719981
709	L-aspartate transport in	asp-L[e] --> asp-L[e]	Transport, Extracellular	Cytosol, Extra-organism	Irreversible	SLC7A13	18195088
710	L-glutamate transport in	glu-L[e] --> glu-L[e]	Transport, Extracellular	Cytosol, Extra-organism	Irreversible	SLC7A13	18195088
711	glycochenodeoxycholate transport via bicarbonate countertransport	gdchola[e] + hco3[c] <==> gchola[c] + hco3[e]	Transport, Extracellular	Cytosol, Extra-organism	Reversible	SLCO1A2	14579113
712	taurochenodeoxycholate transport via bicarbonate countertransport	tdchola[e] + hco3[c] <==> gchola[c] + hco3[e]	Transport, Extracellular	Cytosol, Extra-organism	Reversible	SLCO1A2	14579113
713	glycocholate transport via bicarbonate countertransport	gchola[e] + hco3[c] <==> gchola[c] + hco3[e]	Transport, Extracellular	Cytosol, Extra-organism	Reversible	SLCO1B1	14579113
714	glycochenodoexycholate transport via bicarbonate countertransport	gdchola[e] + hco3[c] <==> gchola[c] + hco3[e]	Transport, Extracellular	Cytosol, Extra-organism	Reversible	SLCO1B1	14579113
715	prostaglandin transport via bicarbonate countertransport	hco3[c] + prostge2[e] <==> hco3[e] + prostge2[c]	Transport, Extracellular	Cytosol, Extra-organism	Reversible	SLCO1B1	14579113
716	taurocholate transport via bicarbonate countertransport	hco3[c] + tchola[e] <==> hco3[e] + tchola[c]	Transport, Extracellular	Cytosol, Extra-organism	Reversible	SLCO1B1	14579113
717	T4 transport via bicarbonate countertransport	hco3[c] + thyox-L[e] <==> hco3[e] + thyox-L[c]	Transport, Extracellular	Cytosol, Extra-organism	Reversible	SLCO1B1	14579113
718	T3 transport via bicarbonate countertransport	hco3[c] + triodthy[e] <==> hco3[e] + triodthy[c]	Transport, Extracellular	Cytosol, Extra-organism	Reversible	SLCO1B1	14579113
719	taurochenodoexycholate transport via bicarbonate countertransport	tdchola[e] + hco3[c] <==> gchola[c] + hco3[e]	Transport, Extracellular	Cytosol, Extra-organism	Reversible	SLCO1B1	14579113
720	bilirubin monoglucuronide transport via bicarbonate countertransport	bilglcur[e] + hco3[c] <==> bilglcur[c] + hco3[e]	Transport, Extracellular	Cytosol, Extra-organism	Reversible	SLCO1B3	14579113
721	glycocholate transport via bicarbonate countertransport	gchola[e] + hco3[c] <==> gchola[c] + hco3[e]	Transport, Extracellular	Cytosol, Extra-organism	Reversible	SLCO1B3	14579113
722	glycochenodoexycholate transport via bicarbonate countertransport	gdchola[e] + hco3[c] <==> gchola[c] + hco3[e]	Transport, Extracellular	Cytosol, Extra-organism	Reversible	SLCO1B3	14579113
723	taurocholate transport via bicarbonate countertransport	hco3[c] + tchola[e] <==> hco3[e] + tchola[c]	Transport, Extracellular	Cytosol, Extra-organism	Reversible	SLCO1B3	14579113
724	T4 transport via bicarbonate countertransport	hco3[c] + thyox-L[e] <==> hco3[e] + thyox-L[c]	Transport, Extracellular	Cytosol, Extra-organism	Reversible	SLCO1B3	14579113
725	T3 transport via bicarbonate countertransport	hco3[c] + triodthy[e] <==> hco3[e] + triodthy[c]	Transport, Extracellular	Cytosol, Extra-organism	Reversible	SLCO1B3	14579113
726	taurochenodoexycholate transport via bicarbonate countertransport	tdchola[e] + hco3[c] <==> gchola[c] + hco3[e]	Transport, Extracellular	Cytosol, Extra-organism	Reversible	SLCO1B3	14579113
727	T4 transport via bicarbonate countertransport	hco3[c] + thyox-L[e] <==> hco3[e] + thyox-L[c]	Transport, Extracellular	Cytosol, Extra-organism	Reversible	SLCO1C1	14579113
728	T3 transport via bicarbonate countertransport	hco3[c] + triodthy[e] <==> hco3[e] + triodthy[c]	Transport, Extracellular	Cytosol, Extra-organism	Reversible	SLCO1C1	14579113
729	prostaglandin transport via bicarbonate countertransport	hco3[c] + prostge2[e] <==> hco3[e] + prostge2[c]	Transport, Extracellular	Cytosol, Extra-organism	Reversible	SLCO2A1	14579113
730	estrone-3-sulfate transport via bicarbonate countertransport	estrones[e] + hco3[c] <==> estrones[c] + hco3[e]	Transport, Extracellular	Cytosol, Extra-organism	Reversible	SLCO2B1	14579113
731	estrone-3-sulfate transport via bicarbonate countertransport	estrones[e] + hco3[c] <==> estrones[c] + hco3[e]	Transport, Extracellular	Cytosol, Extra-organism	Reversible	SLCO3A1	14579113
732	prostaglandin transport via bicarbonate countertransport	hco3[c] + prostge2[e] <==> hco3[e] + prostge2[c]	Transport, Extracellular	Cytosol, Extra-organism	Reversible	SLCO3A1	14579113
733	prostaglandin transport via bicarbonate countertransport	hco3[c] + prostge2[e] <==> hco3[e] + prostge2[c]	Transport, Extracellular	Cytosol, Extra-organism	Reversible	SLCO4A1	14579113
734	taurocholate transport via bicarbonate countertransport	hco3[c] + tchola[e] <==> hco3[e] + tchola[c]	Transport, Extracellular	Cytosol, Extra-organism	Reversible	SLCO4A1	14579113
735	T4 transport via bicarbonate countertransport	hco3[c] + thyox-L[e] <==> hco3[e] + thyox-L[c]	Transport, Extracellular	Cytosol, Extra-organism	Reversible	SLCO4A1	14579113
736	T3 transport via bicarbonate countertransport	hco3[c] + triodthy[e] <==> hco3[e] + triodthy[c]	Transport, Extracellular	Cytosol, Extra-organism	Reversible	SLCO4A1	14579113
737	taurocholate transport via bicarbonate countertransport	hco3[c] + tchola[e] <==> hco3[e] + tchola[c]	Transport, Extracellular	Cytosol, Extra-organism	Reversible	SLCO6B1	14579113
738	T4 transport via bicarbonate countertransport	hco3[c] + thyox-L[e] <==> hco3[e] + thyox-L[c]	Transport, Extracellular	Cytosol, Extra-organism	Reversible	SLCO6B1	14579113
