# Supplementary material for: Interpreting Metabolomic Profiles using Unbiased Pathway Models
Source: PLoS Comput Biol. 2010 Feb 26;6(2):e1000692. doi: 10.1371/journal.pcbi.1000692 (PMC2829050; doi:10.1371/journal.pcbi.1000692)
Supplement: Table S3 — Relative frequencies for metabolites in Active Module Solutions. A frequency threshold of 0.20 for appearance of metabolites was used for subsequent analysis and figure construction. (0.07 MB XLS) [file pcbi.1000692.s003.xls]

## Sheet: NGT_EMRN
Recon1_ID	Name	Frequency	Measured Status
val-L[e]	L-Valine	1	yes
lys-L[e]	L-Lysine	1	yes
phe-L[e]	L-Phenylalanine	1	yes
asp-L[e]	L-Aspartate	1	yes
ser-L[e]	L-Serine	1	yes
his-L[e]	L-Histidine	1	yes
tdchola[e]	taurochenodeoxycholate	1	yes
tyr-L[e]	L-Tyrosine	1	yes
hom-L[e]	L-Homoserine	1	yes
glyb[e]	Glycine betaine	1	yes
citr-L[e]	L-Citrulline	1	yes
met-L[e]	L-Methionine	1	yes
gchola[e]	glycocholate	1	yes
gdchola[e]	glycochenodeoxycholate	1	yes
thr-L[e]	L-Threonine	1	yes
orn[e]	Ornithine	1	yes
trp-L[e]	L-Tryptophan	1	yes
glu-L[e]	L-Glutamate	1	yes
dmgly[e]	N,N-Dimethylglycine	1	yes
pro-L[e]	L-Proline	1	yes
asn-L[e]	L-Asparagine	1	yes
akg[e]	2-Oxoglutarate	0.78	yes
lac-L[e]	L-Lactate	0.67	yes
pyr[e]	Pyruvate	0.67	yes
leu-L[e]	L-Leucine	0.59	yes
ile-L[e]	L-Isoleucine	0.45	yes
xan[e]	Xanthine	0.38	yes
Lcystin[c]	L-Cystine	0.37	no
cit[e]	Citrate	0.37	yes
glyc3p[c]	Glycerol 3-phosphate	0.32	no
glyc3p[e]	Glycerol 3-phosphate	0.32	yes
glyc[e]	Glycerol	0.32	yes
glyc[c]	Glycerol	0.32	no
crtn[e]	Creatinine	0.31	yes
glu-L[c]	L-Glutamate	0.29	no
chol[c]	Choline	0.29	no
triodthy[e]	Triiodothyronine	0.26	no
Lcystin[e]	L-Cystine	0.23	no
thyox-L[e]	L-Thyroxine	0.2	no
triodthy[c]	Triiodothyronine	0.19	no
r1p[c]	alpha-D-Ribose 1-phosphate	0.17	yes
xmp[c]	Xanthosine 5'-phosphate	0.14	no
asp-L[c]	L-Aspartate	0.14	no
prpp[c]	5-Phospho-alpha-D-ribose 1-diphosphate	0.13	no
thyox-L[c]	L-Thyroxine	0.13	no
estrones[e]	Estrone 3-sulfate	0.13	no
prostge2[e]	Prostaglandin E2	0.12	no
succ[c]	Succinate	0.11	no
akg[c]	2-Oxoglutarate	0.11	no
btn[e]	Biotin	0.1	no
prostge2[c]	Prostaglandin E2	0.1	no
r5p[c]	alpha-D-Ribose 5-phosphate	0.1	yes
ac[c]	Acetate	0.1	no
pyr[c]	Pyruvate	0.09	no
tchola[c]	taurocholic acid	0.08	no
cit[c]	Citrate	0.08	no
estradiolglc[c]	estradiol glucuronide	0.07	no
gln-L[c]	L-Glutamine	0.07	no
btn[c]	Biotin	0.07	no
estradiolglc[e]	estradiol glucuronide	0.07	no
imp[c]	IMP	0.06	no
tchola[e]	taurocholic acid	0.06	no
ade[c]	Adenine	0.05	no
phe-L[c]	L-Phenylalanine	0.05	no
hxan[c]	Hypoxanthine	0.05	no
cys-L[c]	L-Cysteine	0.05	no
adn[c]	Adenosine	0.04	no
ala-L[c]	L-Alanine	0.04	no
Rtotalcoa[c]	R total Coenzyme A	0.04	no
adn[e]	Adenosine	0.04	no
oaa[c]	Oxaloacetate	0.03	no
ncam[e]	Nicotinamide	0.03	yes
amet[c]	S-Adenosyl-L-methionine	0.03	no
leu-L[c]	L-Leucine	0.03	no
din[c]	Deoxyinosine	0.03	no
leuktrC4[c]	Leukotriene C4	0.03	no
glyb[c]	Glycine betaine	0.03	no
ncam[c]	Nicotinamide	0.03	no
duri[c]	Deoxyuridine	0.03	no
lys-L[m]	L-Lysine	0.03	no
asn-L[c]	L-Asparagine	0.03	no
tyr-L[c]	L-Tyrosine	0.03	no
atp[c]	ATP	0.03	no
crn[c]	L-Carnitine	0.03	no
srtn[c]	Serotonin	0.02	no
cytd[e]	Cytidine	0.02	no
mthgxl[c]	Methylglyoxal	0.02	no
citr-L[c]	L-Citrulline	0.02	no
dgsn[c]	Deoxyguanosine	0.02	no
4abut[c]	4-Aminobutanoate	0.02	no
acald[c]	Acetaldehyde	0.02	no
xan[c]	Xanthine	0.02	no
gua[c]	Guanine	0.02	no
gsn[c]	Guanosine	0.02	no
dcamp[c]	N6-(1,2-Dicarboxyethyl)-AMP	0.02	no
estrones[c]	Estrone 3-sulfate	0.02	no
ins[c]	Inosine	0.02	no
cytd[c]	Cytidine	0.02	no
L2aadp[c]	L-2-Aminoadipate	0.02	no
ala-B[c]	beta-Alanine	0.02	no
fol[c]	Folate	0.02	no
val-L[c]	L-Valine	0.02	no
ura[c]	Uracil	0.01	no
strdnccoa[c]	stearidonyl coenzyme A	0.01	no
cgly[e]	Cys-Gly	0.01	no
ala-B[e]	beta-Alanine	0.01	no
34dhphe[c]	3,4-Dihydroxy-L-phenylalanine	0.01	no
g3p[c]	Glyceraldehyde 3-phosphate	0.01	no
thf[c]	5,6,7,8-Tetrahydrofolate	0.01	no
met-L[c]	L-Methionine	0.01	no
gsn[e]	Guanosine	0.01	no
damp[c]	dAMP	0.01	no
lys-L[c]	L-Lysine	0.01	no
ascb-L[c]	L-Ascorbate	0.01	no
ala-B[m]	beta-Alanine	0.01	no
25aics[c]	(S)-2-[5-Amino-1-(5-phospho-D-ribosyl)imidazole-4-carboxamido]succinate	0.01	no
4aphdob[c]	4-(2-Aminophenyl)-2,4-dioxobutanoate	0.01	no
thr-L[c]	L-Threonine	0.01	no
f6p[c]	D-Fructose 6-phosphate	0.01	no
dttp[c]	dTTP	0.01	no
mal-L[m]	L-Malate	0.01	no
pmtcoa[c]	Palmitoyl-CoA (n-C16:0CoA)	0.01	no
bamppald[c]	beta-Aminopropion aldehyde	0.01	no
ru5p-D[c]	D-Ribulose 5-phosphate	0.01	yes
crn[e]	L-Carnitine	0.01	no
adrnl[c]	Adrenaline	0.01	no
arg-L[c]	L-Arginine	0.01	no
utp[c]	UTP	0.01	no
sarcs[c]	Sarcosine	0.01	no
dcyt[c]	Deoxycytidine	0.01	no
uri[c]	Uridine	0.01	no
ile-L[c]	L-Isoleucine	0.01	no
dad-2[c]	Deoxyadenosine	0.01	no
dtmp[c]	dTMP	0.01	no
3hanthrn[c]	3-Hydroxyanthranilate	0.01	no
pro-L[c]	L-Proline	0.01	no
camp[e]	cAMP	0.01	no
icit[c]	Isocitrate	0.01	yes
lac-D[c]	D-Lactate	0.01	no
cyst-L[c]	L-Cystathionine	0.01	no
stcoa[c]	Stearoyl-CoA (n-C18:0CoA)	0.01	no
prostgf2[e]	Prostaglandin F2alpha	0.01	no
ser-L[c]	L-Serine	0.01	no

## Sheet: NGT_CMRN
Recon1_ID	Name	Frequency	Measured Status
glyc3p[c]	Glycerol 3-phosphate	1	yes
pyr[c]	Pyruvate	1	yes
met-L[c]	L-Methionine	1	yes
citr-L[c]	L-Citrulline	1	yes
asp-L[c]	L-Aspartate	1	yes
lys-L[c]	L-Lysine	1	yes
glyb[c]	Glycine betaine	1	yes
phe-L[c]	L-Phenylalanine	1	yes
lac-L[c]	L-Lactate	1	yes
ncam[c]	Nicotinamide	1	yes
trp-L[c]	L-Tryptophan	1	yes
thr-L[c]	L-Threonine	1	yes
dmgly[c]	N,N-Dimethylglycine	1	yes
xan[c]	Xanthine	1	yes
glyc[c]	Glycerol	1	yes
crtn[c]	Creatinine	1	yes
his-L[c]	L-Histidine	1	yes
glu-L[c]	L-Glutamate	1	yes
asn-L[c]	L-Asparagine	1	yes
gchola[c]	glycocholate	1	yes
akg[c]	2-Oxoglutarate	1	yes
tyr-L[c]	L-Tyrosine	1	yes
hom-L[c]	L-Homoserine	1	yes
pro-L[c]	L-Proline	1	yes
val-L[c]	L-Valine	1	yes
orn[c]	Ornithine	1	yes
ser-L[c]	L-Serine	1	yes
tdchola[c]	taurochenodeoxycholate	1	yes
gdchola[c]	glycochenodeoxycholate	1	yes
chol[c]	Choline	0.99	yes
prpp[c]	5-Phospho-alpha-D-ribose 1-diphosphate	0.6	no
leu-L[c]	L-Leucine	0.57	yes
ile-L[c]	L-Isoleucine	0.45	yes
r5p[c]	alpha-D-Ribose 5-phosphate	0.38	yes
r1p[c]	alpha-D-Ribose 1-phosphate	0.35	yes
amet[c]	S-Adenosyl-L-methionine	0.21	no
triodthy[c]	Triiodothyronine	0.16	no
prostge2[e]	Prostaglandin E2	0.15	no
tchola[e]	taurocholic acid	0.13	no
leuktrC4[c]	Leukotriene C4	0.12	no
thyox-L[e]	L-Thyroxine	0.12	no
thyox-L[c]	L-Thyroxine	0.11	no
tchola[c]	taurocholic acid	0.08	no
prostge2[c]	Prostaglandin E2	0.08	no
xmp[c]	Xanthosine 5'-phosphate	0.08	no
triodthy[e]	Triiodothyronine	0.05	no
Lcyst[c]	L-Cysteate	0.04	no
srtn[c]	Serotonin	0.04	no
2obut[c]	2-Oxobutanoate	0.04	no
ahcys[c]	S-Adenosyl-L-homocysteine	0.04	yes
ile-L[e]	L-Isoleucine	0.03	no
din[c]	Deoxyinosine	0.03	no
imp[c]	IMP	0.03	yes
dheas[e]	Dehydroepiandrosterone sulfate	0.03	no
acac[c]	Acetoacetate	0.03	no
estrones[e]	Estrone 3-sulfate	0.03	no
ala-B[c]	beta-Alanine	0.03	no
cyst-L[c]	L-Cystathionine	0.03	no
2dr1p[c]	2-Deoxy-D-ribose 1-phosphate	0.03	no
nad[c]	Nicotinamide adenine dinucleotide	0.02	no
phe-L[e]	L-Phenylalanine	0.02	no
cytd[e]	Cytidine	0.02	no
adn[c]	Adenosine	0.02	no
ac[c]	Acetate	0.02	no
3sala[c]	3-Sulfino-L-alanine	0.02	no
gdp[c]	GDP	0.02	no
dnad[c]	Deamino-NAD+	0.02	no
Lcystin[e]	L-Cystine	0.02	no
2dr5p[c]	2-Deoxy-D-ribose 5-phosphate	0.02	no
gly[e]	Glycine	0.02	no
gsn[c]	Guanosine	0.02	no
pmtcoa[c]	Palmitoyl-CoA (n-C16:0CoA)	0.02	no
34dhphe[c]	3,4-Dihydroxy-L-phenylalanine	0.02	no
asn-L[e]	L-Asparagine	0.02	no
crn[e]	L-Carnitine	0.02	no
3htmelys[c]	3-Hydroxy-N6,N6,N6-trimethyl-L-lysine	0.02	no
trypta[c]	Tryptamine	0.02	no
hista[c]	Histamine	0.02	no
Rtotalcoa[c]	R total Coenzyme A	0.02	no
thr-L[e]	L-Threonine	0.02	no
selcys[c]	Selenocysteine	0.02	no
gly[c]	Glycine	0.02	no
dcyt[c]	Deoxycytidine	0.02	no
lac-D[c]	D-Lactate	0.02	no
Rtotal2[e]	R total 2 position	0.02	no
orn[m]	Ornithine	0.02	no
val-L[e]	L-Valine	0.01	no
Nacsertn[c]	N-Acetylserotonin	0.01	no
4abut[e]	4-Aminobutanoate	0.01	no
btn[e]	Biotin	0.01	no
cgly[e]	Cys-Gly	0.01	no
ade[c]	Adenine	0.01	no
lys-L[e]	L-Lysine	0.01	no
4aphdob[c]	4-(2-Aminophenyl)-2,4-dioxobutanoate	0.01	no
4abut[c]	4-Aminobutanoate	0.01	no
5hxkynam[c]	5-Hydroxykynurenamine	0.01	no
trp-L[e]	L-Tryptophan	0.01	no
glu-L[m]	L-Glutamate	0.01	no
gln-L[c]	L-Glutamine	0.01	yes
thf[c]	5,6,7,8-Tetrahydrofolate	0.01	no
lac-D[m]	D-Lactate	0.01	no
hLkynr[c]	3-Hydroxy-L-kynurenine	0.01	no
chol[e]	Choline	0.01	no
ach[e]	Acetylcholine	0.01	no
urea[c]	Urea	0.01	no
oaa[m]	Oxaloacetate	0.01	no
5hoxindact[c]	5-Hydroxyindoleacetaldehyde	0.01	no
dgsn[c]	Deoxyguanosine	0.01	no
uri[e]	Uridine	0.01	no
4fumacac[c]	4-Fumarylacetoacetate	0.01	no
lald-D[c]	D-Lactaldehyde	0.01	no
selhcys[c]	Selenohomocysteine	0.01	no
his-L[e]	L-Histidine	0.01	no
nicrns[c]	Nicotinate D-ribonucleoside	0.01	no
acald[c]	Acetaldehyde	0.01	no
cbp[c]	Carbamoyl phosphate	0.01	no
tdchola[e]	taurochenodeoxycholate	0.01	no
ptrc[c]	Putrescine	0.01	no
ac[e]	Acetate	0.01	no
thf[m]	5,6,7,8-Tetrahydrofolate	0.01	no
f6p[c]	D-Fructose 6-phosphate	0.01	no
gdchola[x]	glycochenodeoxycholate	0.01	no
10fthf[c]	10-Formyltetrahydrofolate	0.01	no
nrpphr[c]	Norepinephrine	0.01	no
3aib[c]	L-3-Amino-isobutanoate	0.01	yes
dhdascb[c]	Dehydroascorbate	0.01	no
gln-L[e]	L-Glutamine	0.01	no
gcald[c]	Glycolaldehyde	0.01	no
mal-L[m]	L-Malate	0.01	no
pydxn[c]	Pyridoxine	0.01	yes
1pyr5c[m]	1-Pyrroline-5-carboxylate	0.01	no
glyb[e]	Glycine betaine	0.01	no
lys-L[m]	L-Lysine	0.01	no
dcamp[c]	N6-(1,2-Dicarboxyethyl)-AMP	0.01	no
met-L[e]	L-Methionine	0.01	no
cytd[c]	Cytidine	0.01	no
ascb-L[e]	L-Ascorbate	0.01	no
selcyst[c]	Selenocystathionine	0.01	no
gchola[e]	glycocholate	0.01	no
sarcs[c]	Sarcosine	0.01	no
gchola[x]	glycocholate	0.01	no
gdchola[e]	glycochenodeoxycholate	0.01	no
orn[e]	Ornithine	0.01	no
pydx5p[c]	Pyridoxal 5'-phosphate	0.01	no
melatn[c]	Melatonin	0.01	no
2amac[c]	2-Aminoacrylate	0.01	no
leu-L[e]	L-Leucine	0.01	no
dad-2[c]	Deoxyadenosine	0.01	no
glc-D[l]	D-Glucose	0.01	no
pap[c]	Adenosine 3',5'-bisphosphate	0.01	no
gam6p[c]	D-Glucosamine 6-phosphate	0.01	no
Lfmkynr[c]	L-Formylkynurenine	0.01	no
camp[e]	cAMP	0.01	no
gal[e]	D-Galactose	0.01	no
adn[e]	Adenosine	0.01	no
25aics[c]	(S)-2-[5-Amino-1-(5-phospho-D-ribosyl)imidazole-4-carboxamido]succinate	0.01	no
fol[c]	Folate	0.01	no
prostgf2[e]	Prostaglandin F2alpha	0.01	no
3aib[m]	L-3-Amino-isobutanoate	0.01	no
adprib[c]	ADPribose	0.01	no
prostgf2[c]	Prostaglandin F2alpha	0.01	no
inost[c]	myo-Inositol	0.01	no
ala-L[e]	L-Alanine	0.01	no
cys-L[e]	L-Cysteine	0.01	no

## Sheet: IGT_EMRN
Recon1_ID	Name	Frequency	Measured Status
citr-L[e]	L-Citrulline	1	yes
leu-L[e]	L-Leucine	1	yes
ile-L[e]	L-Isoleucine	1	yes
met-L[e]	L-Methionine	1	yes
lys-L[e]	L-Lysine	1	yes
val-L[e]	L-Valine	1	yes
phe-L[e]	L-Phenylalanine	1	yes
his-L[e]	L-Histidine	1	yes
arg-L[e]	L-Arginine	1	yes
orn[e]	Ornithine	1	yes
asn-L[e]	L-Asparagine	1	yes
trp-L[e]	L-Tryptophan	1	yes
ser-L[e]	L-Serine	1	yes
tyr-L[e]	L-Tyrosine	1	yes
pnto-R[e]	(R)-Pantothenate	0.04	yes
btn[e]	Biotin	0.03	no
crn[c]	L-Carnitine	0.03	no
gln-L[c]	L-Glutamine	0.02	no
thr-L[c]	L-Threonine	0.02	no
pro-L[e]	L-Proline	0.01	yes
citr-L[c]	L-Citrulline	0.01	no
btn[c]	Biotin	0.01	no
tchola[c]	taurocholic acid	0.01	no
lnlncgcoa[c]	gamma-linolenoyl-CoA	0.01	no
Lcystin[c]	L-Cystine	0.01	no
mal-L[c]	L-Malate	0.01	yes
thyox-L[e]	L-Thyroxine	0.01	no
4abut[c]	4-Aminobutanoate	0.01	no
his-L[c]	L-Histidine	0.01	no
asp-L[e]	L-Aspartate	0.01	yes
glu-L[e]	L-Glutamate	0.01	yes
acac[c]	Acetoacetate	0.01	no
stcoa[c]	Stearoyl-CoA (n-C18:0CoA)	0.01	no
triodthy[c]	Triiodothyronine	0.01	no
val-L[c]	L-Valine	0.01	no
orn[c]	Ornithine	0.01	no
camp[c]	cAMP	0.01	no
lys-L[m]	L-Lysine	0.01	no
34dhphe[c]	3,4-Dihydroxy-L-phenylalanine	0.01	no
asn-L[c]	L-Asparagine	0.01	no
pyr[c]	Pyruvate	0.01	no
chol[c]	Choline	0.01	no

## Sheet: IGT_CMRN
Recon1_ID	Name	Frequency	Measured Status
met-L[c]	L-Methionine	1	yes
citr-L[c]	L-Citrulline	1	yes
arg-L[c]	L-Arginine	1	yes
asp-L[c]	L-Aspartate	1	yes
his-L[c]	L-Histidine	1	yes
lys-L[c]	L-Lysine	1	yes
phe-L[c]	L-Phenylalanine	1	yes
trp-L[c]	L-Tryptophan	1	yes
val-L[c]	L-Valine	1	yes
orn[c]	Ornithine	1	yes
asn-L[c]	L-Asparagine	1	yes
ser-L[c]	L-Serine	1	yes
tyr-L[c]	L-Tyrosine	1	yes
leu-L[c]	L-Leucine	0.66	yes
ile-L[c]	L-Isoleucine	0.34	yes
glyc[c]	Glycerol	0.15	yes
pchol_hs[c]	Phosphatidylcholine (homo sapiens)	0.13	no
Rtotal2[e]	R total 2 position	0.09	no
triodthy[c]	Triiodothyronine	0.04	no
Rtotal2[c]	R total 2 position	0.04	no
urea[c]	Urea	0.03	no
imp[c]	IMP	0.03	yes
xan[c]	Xanthine	0.03	yes
ac[c]	Acetate	0.02	no
ala-B[e]	beta-Alanine	0.02	no
trp-L[e]	L-Tryptophan	0.02	no
chol[c]	Choline	0.02	yes
glyc3p[c]	Glycerol 3-phosphate	0.02	yes
thr-L[c]	L-Threonine	0.02	yes
orn[e]	Ornithine	0.02	no
2obut[c]	2-Oxobutanoate	0.02	no
ile-L[e]	L-Isoleucine	0.02	no
pail_hs[c]	phosphatidylinositol (homo sapiens)	0.01	no
ach[e]	Acetylcholine	0.01	no
glyb[e]	Glycine betaine	0.01	no
pro-L[e]	L-Proline	0.01	no
adn[c]	Adenosine	0.01	no
trypta[c]	Tryptamine	0.01	no
crn[e]	L-Carnitine	0.01	no
2kmb[c]	2-keto-4-methylthiobutyrate	0.01	no
3htmelys[c]	3-Hydroxy-N6,N6,N6-trimethyl-L-lysine	0.01	no
gsn[e]	Guanosine	0.01	no
thyox-L[c]	L-Thyroxine	0.01	no
5hxkynam[c]	5-Hydroxykynurenamine	0.01	no
thyox-L[e]	L-Thyroxine	0.01	no
cyst-L[c]	L-Cystathionine	0.01	no
lys-L[e]	L-Lysine	0.01	no
adn[e]	Adenosine	0.01	no
paps[c]	3'-Phosphoadenylyl sulfate	0.01	no
arg-L[e]	L-Arginine	0.01	no
dcyt[c]	Deoxycytidine	0.01	no
asn-L[e]	L-Asparagine	0.01	no
dopa[c]	Dopamine	0.01	no
3aib[c]	L-3-Amino-isobutanoate	0.01	no
gudac[c]	Guanidinoacetate	0.01	no
gln-L[e]	L-Glutamine	0.01	no
gly[c]	Glycine	0.01	no
thf[c]	5,6,7,8-Tetrahydrofolate	0.01	no
orn[m]	Ornithine	0.01	no
triodthy[e]	Triiodothyronine	0.01	no
damp[c]	dAMP	0.01	no
chol[e]	Choline	0.01	no
pser-L[c]	O-Phospho-L-serine	0.01	no
